# Supplementary material for: C-Terminal 1-Aminoethyltetrazole-Containing Oligopeptides as Novel Alanine Racemase Inhibitors
Source: PubMed Central journal article supplement (PMC7145296; doi:10.3390/molecules25061315), 2020-03-13

Supporting information

# C-terminal 1-aminoethyltetrazole containing oligopeptides as novel alanine racemase inhibitors

Laszlo A. Kondacs <sup>1</sup>, Sylvain Orenge <sup>2</sup>, The late Rosaleen J. Anderson <sup>1</sup>, Emma C. L. Marrs <sup>3</sup>, John D. Perry <sup>3</sup>, Mark Gray <sup>1\*</sup>

<sup>1</sup> Sunderland Pharmacy School, University of Sunderland, Sunderland SR1 3SD, U.K.

<sup>2</sup> Research & Development Microbiology, bioMérieux, 38390 La Balme-les-Grottes, France

<sup>3</sup> Department of Microbiology, Freeman Hospital, Newcastle upon Tyne NE7 7DN, U.K.

Methyl-(2S or R)-2-[(benzyloxy)carbonyl]amino}propanoate **6a**:

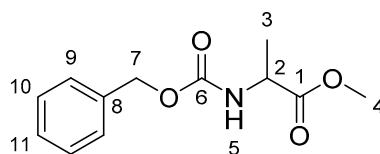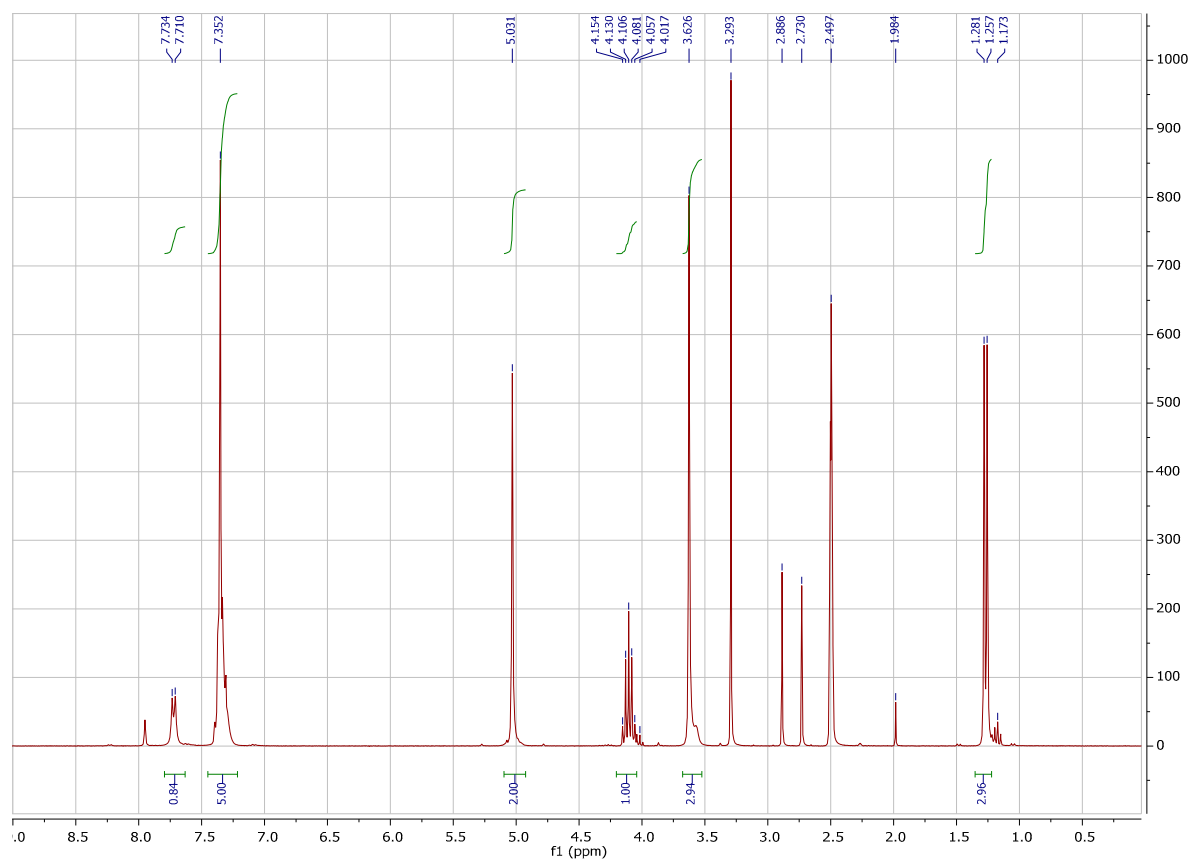

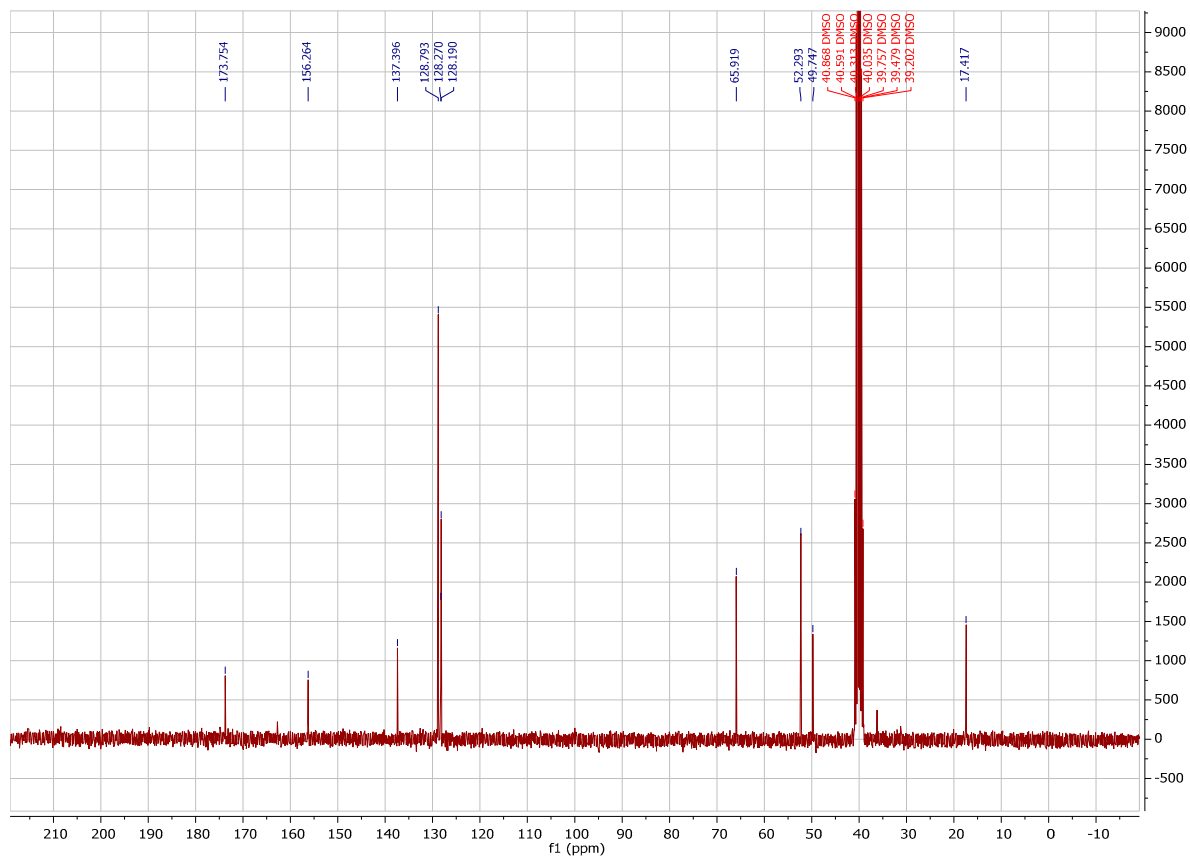

Benzyl-N-[(1S or R)-1-carbamoyl]ethyl]carbamate 7a:

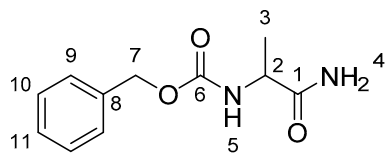

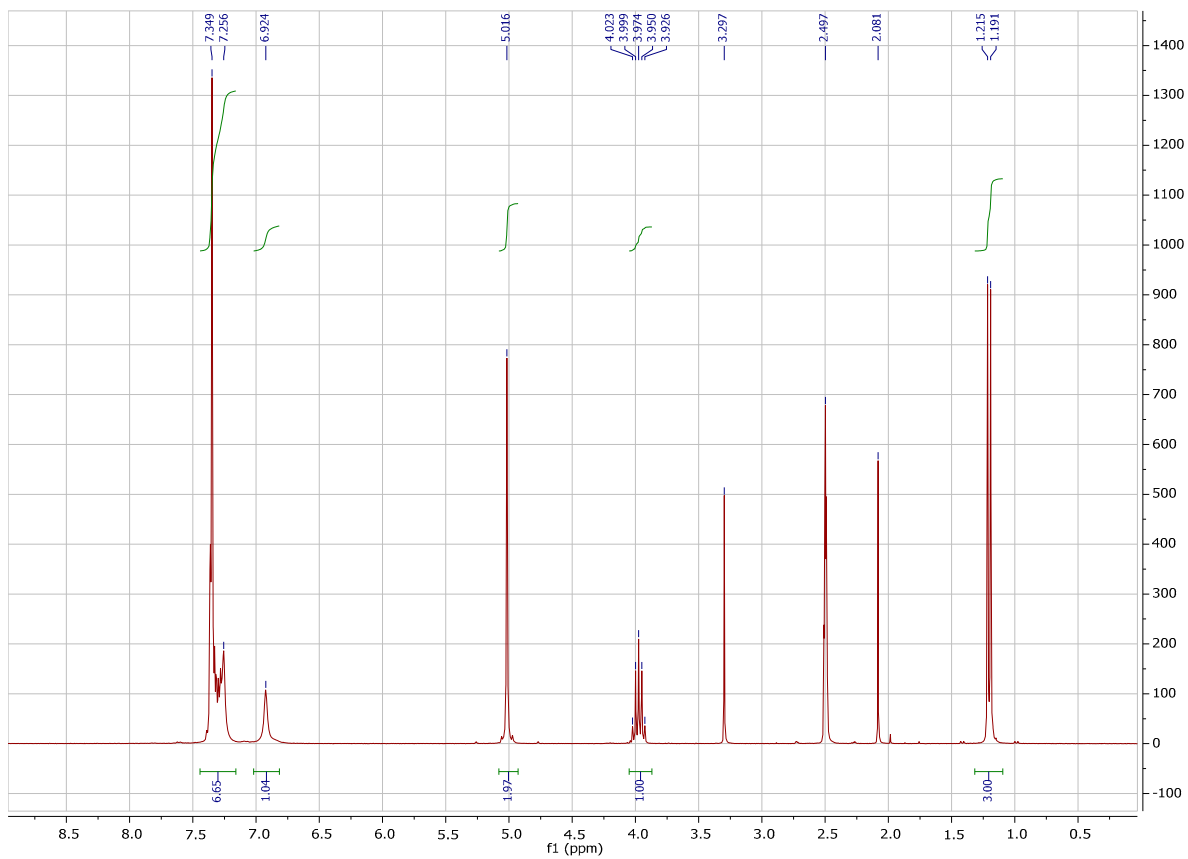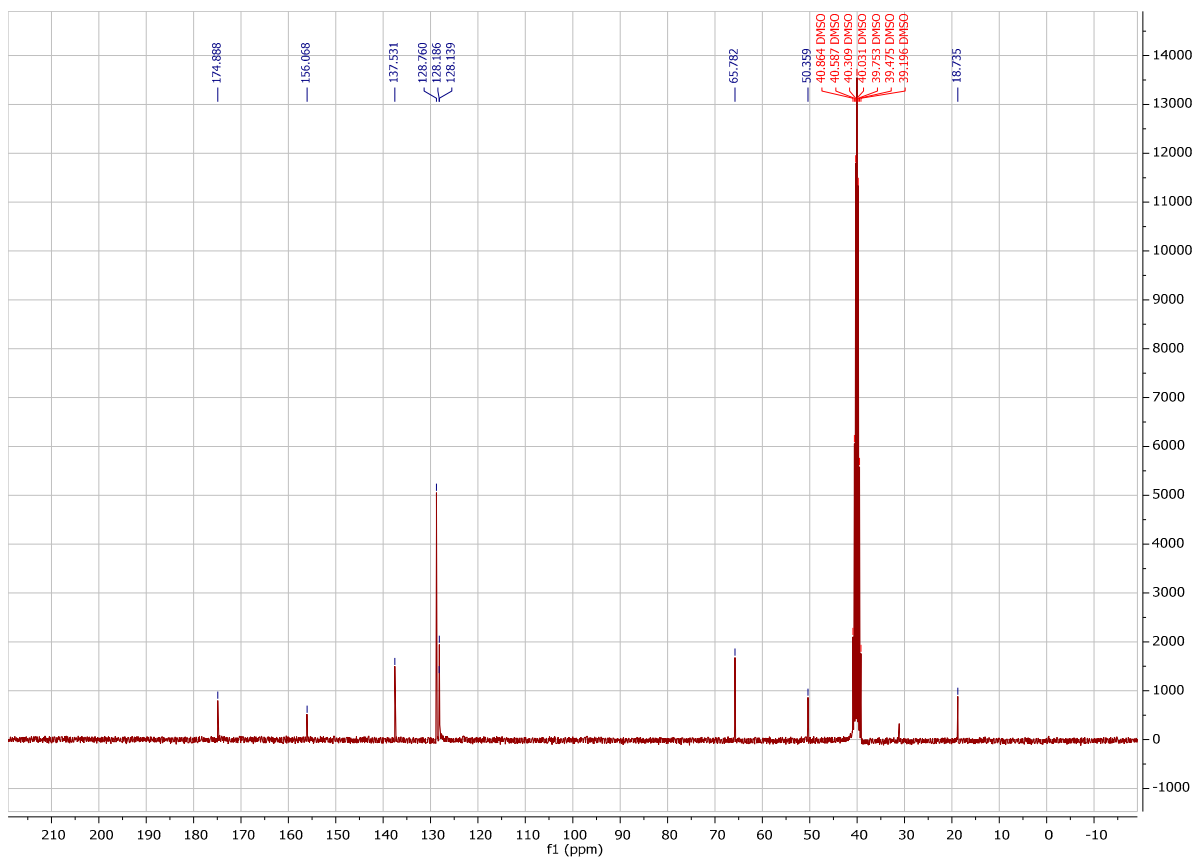

Benzyl-N-[(1S or R)-1-cyanoethyl]carbamate **8a**:

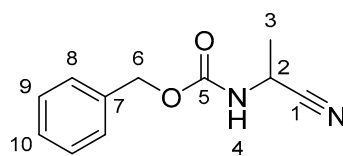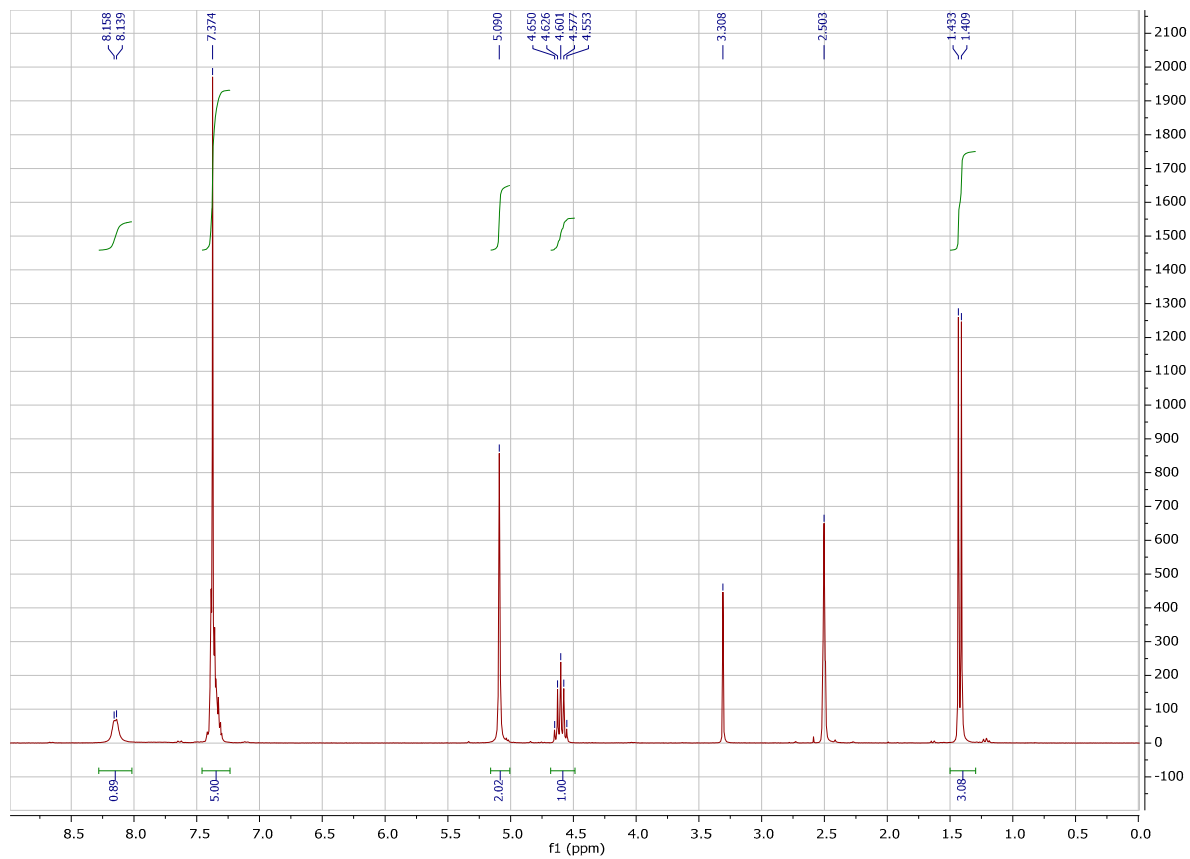

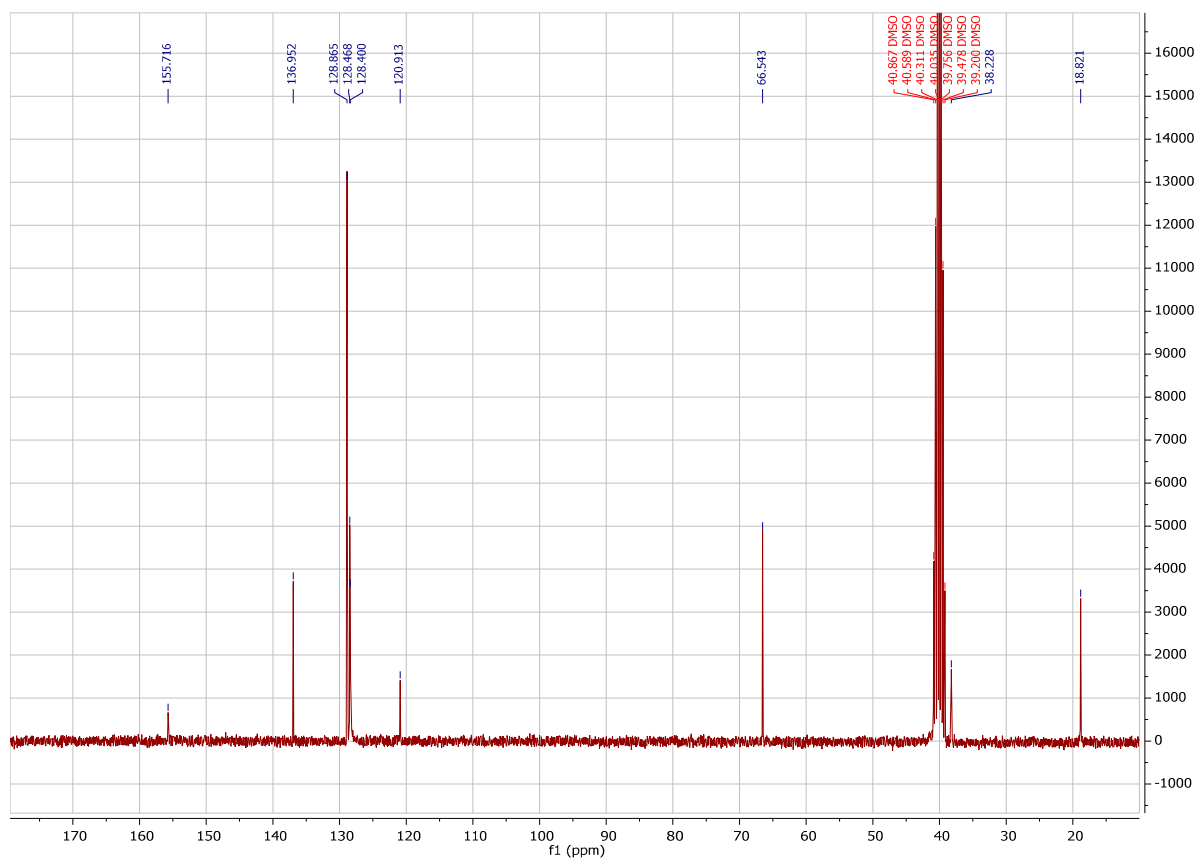

Benzyl-*N*-[(1*S* or *R*)-1-(1*H*-1,2,3,4-tetrazol-5-yl)ethyl]carbamate **9a**:

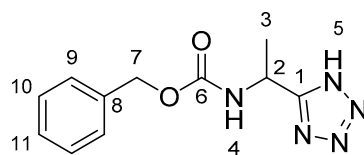

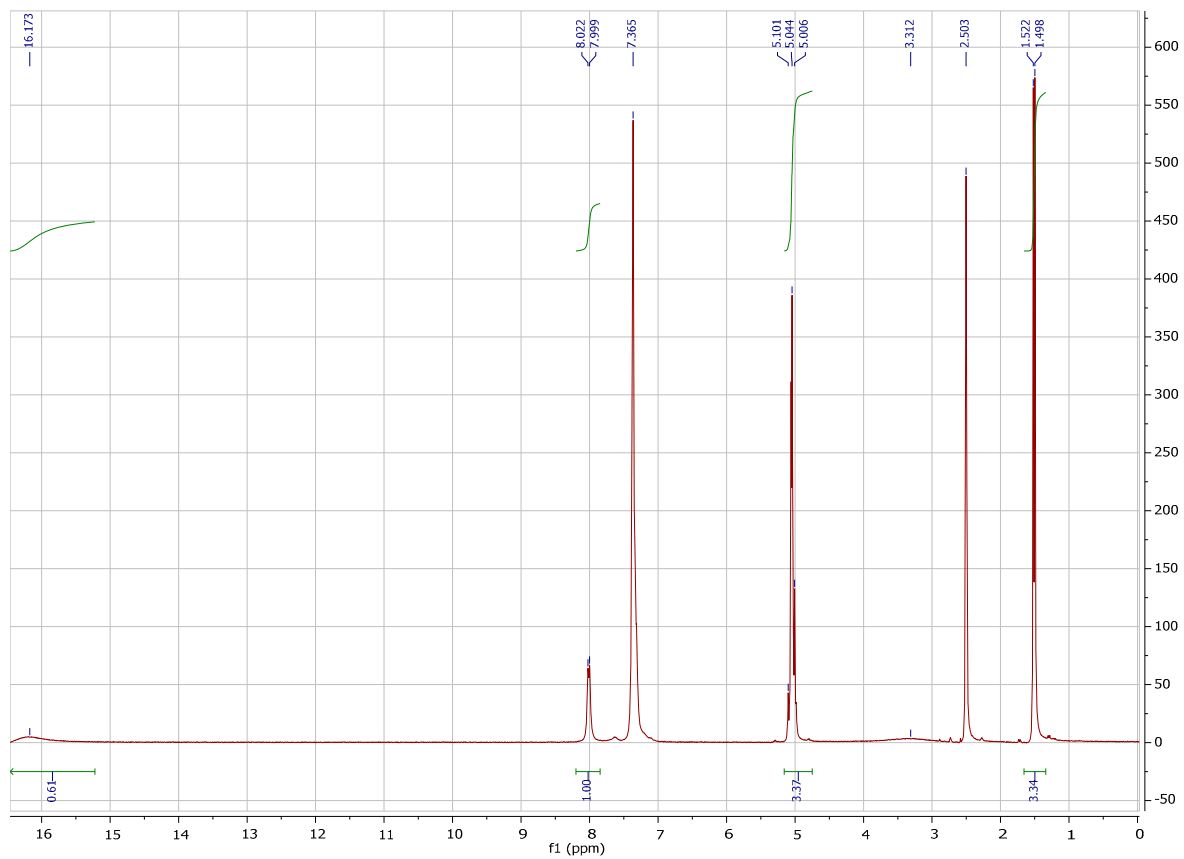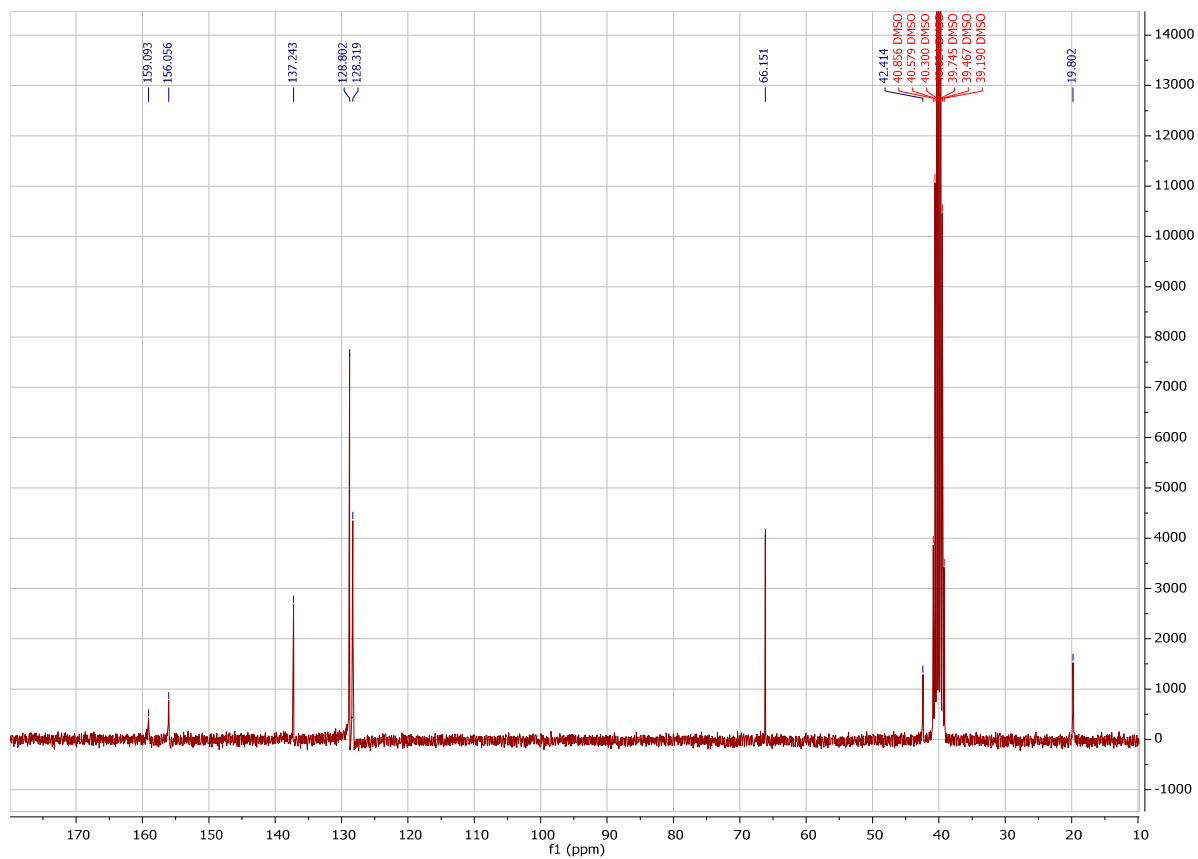

(1S or R)-1-(1H-1,2,3,4-tetrazol-5-yl)ethan-1-amine **4a**:

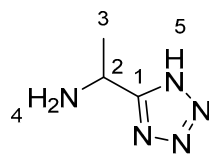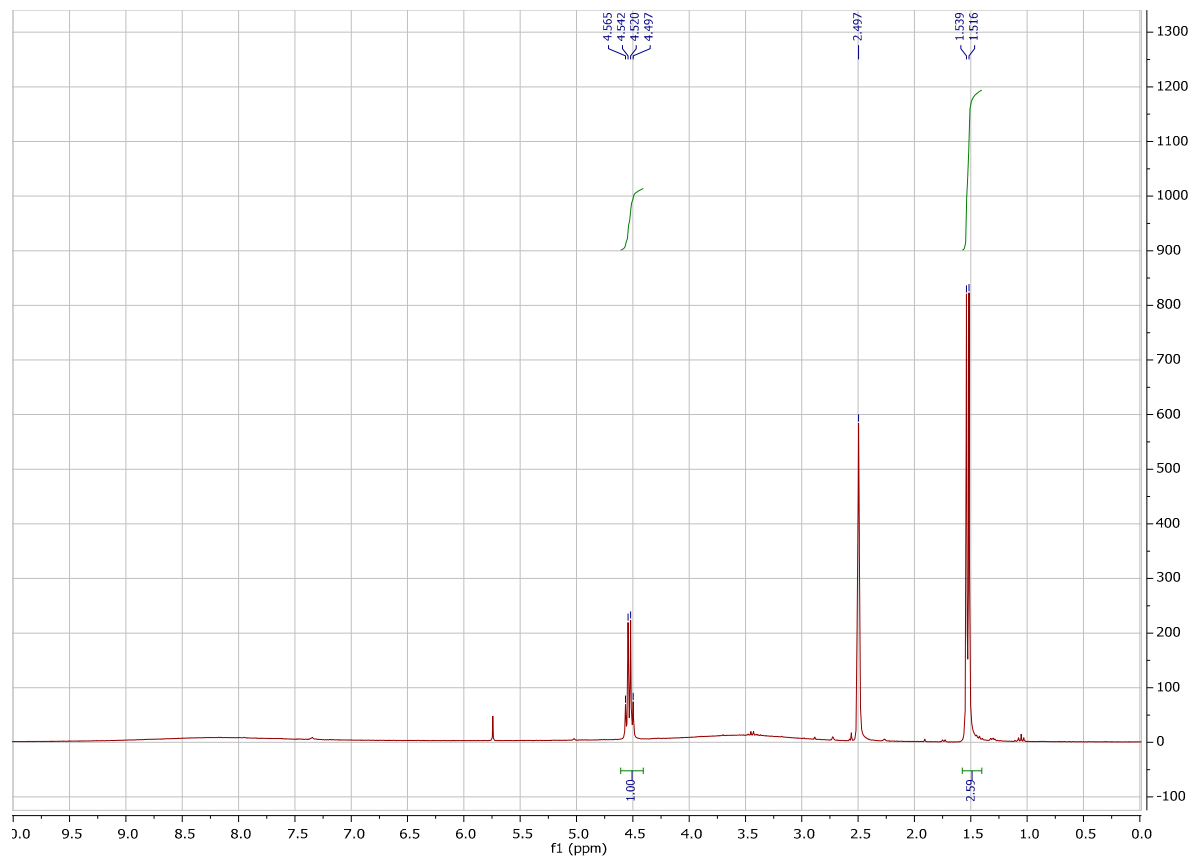

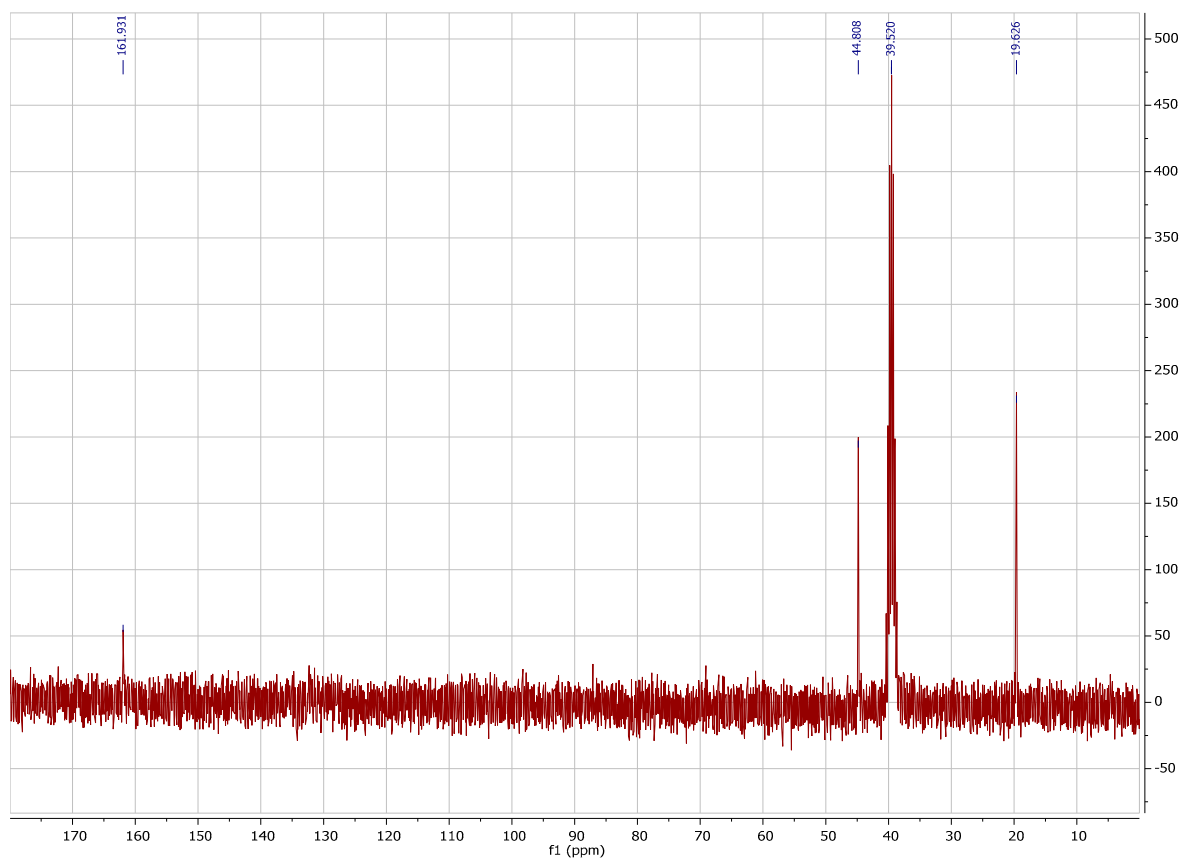

Methyl-(2S)-2-[(benzyloxy)carbonyl]butanoate **6b-L**:

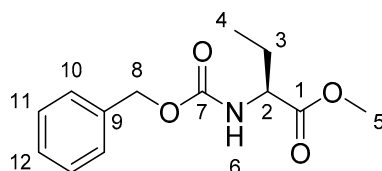



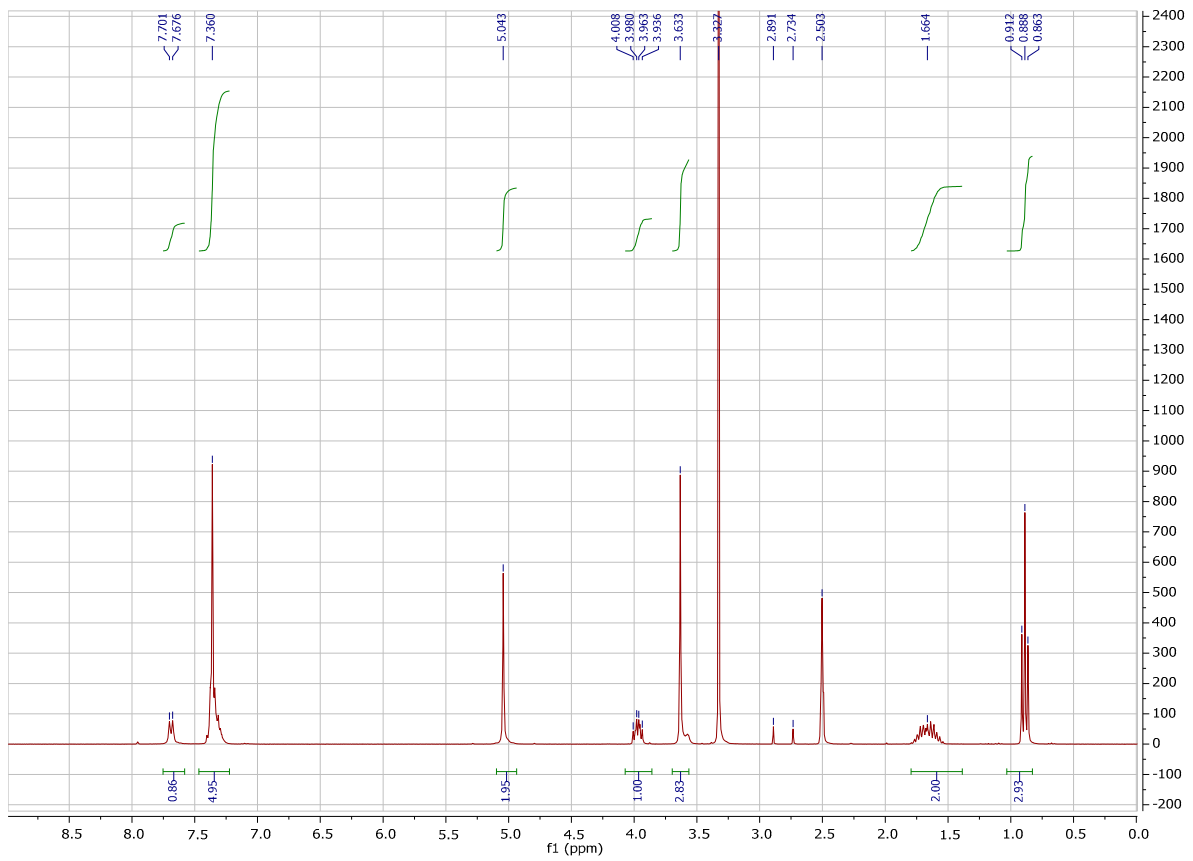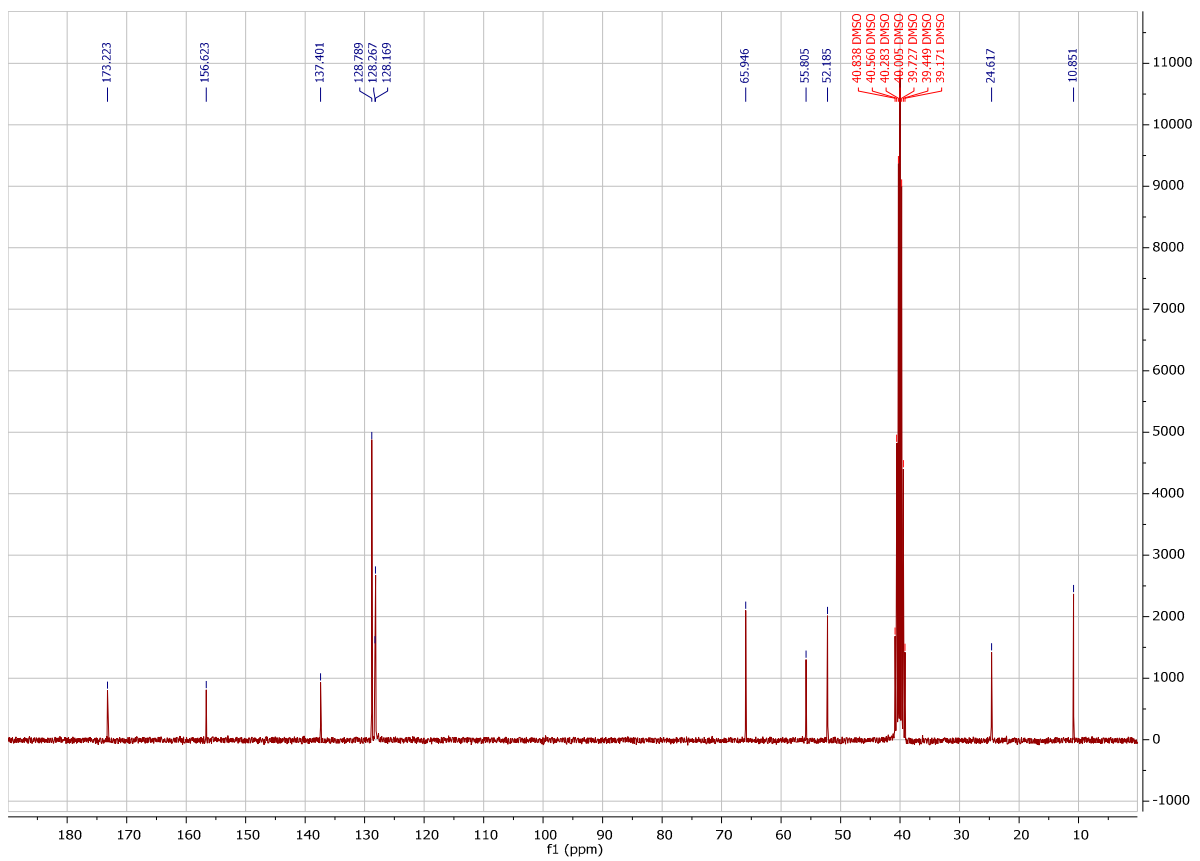

Benzyl-N-[(1S)-1-carbamoylpropyl]carbamate **7b-L**:

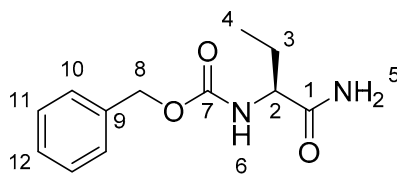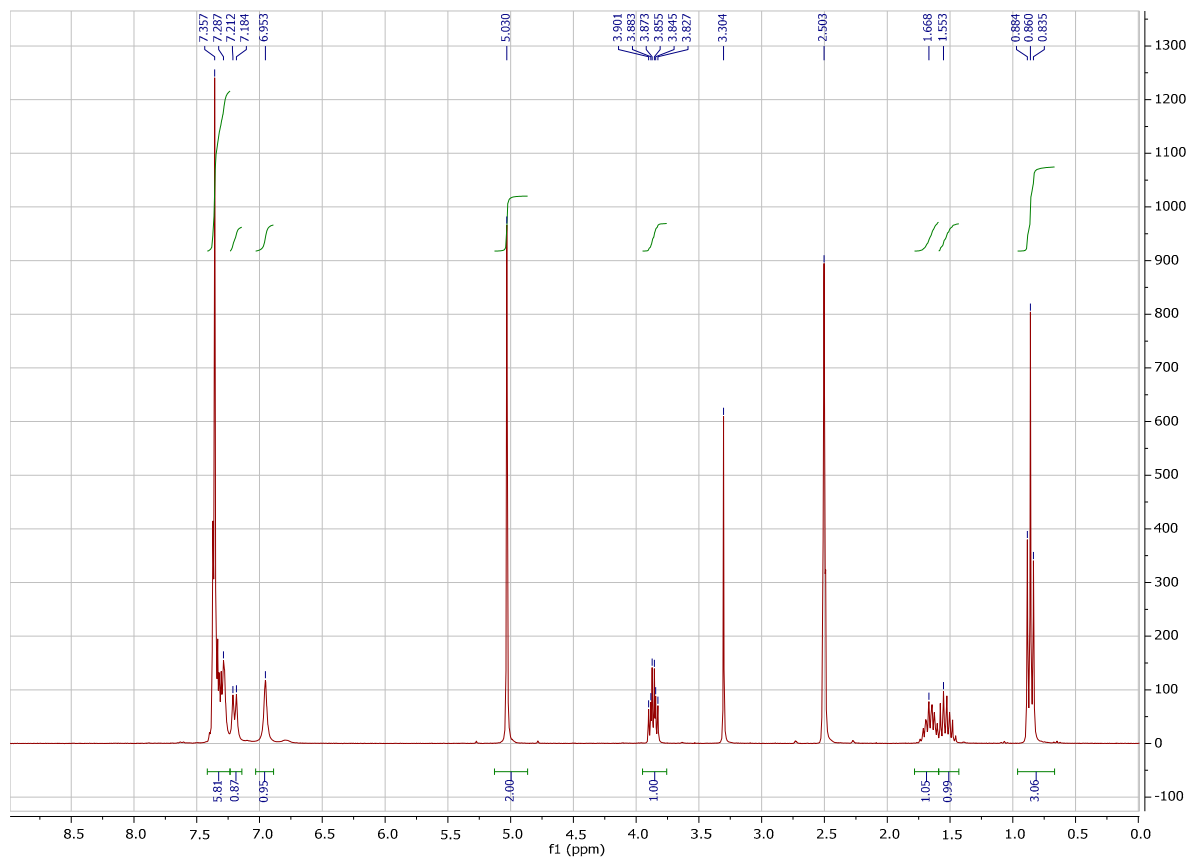

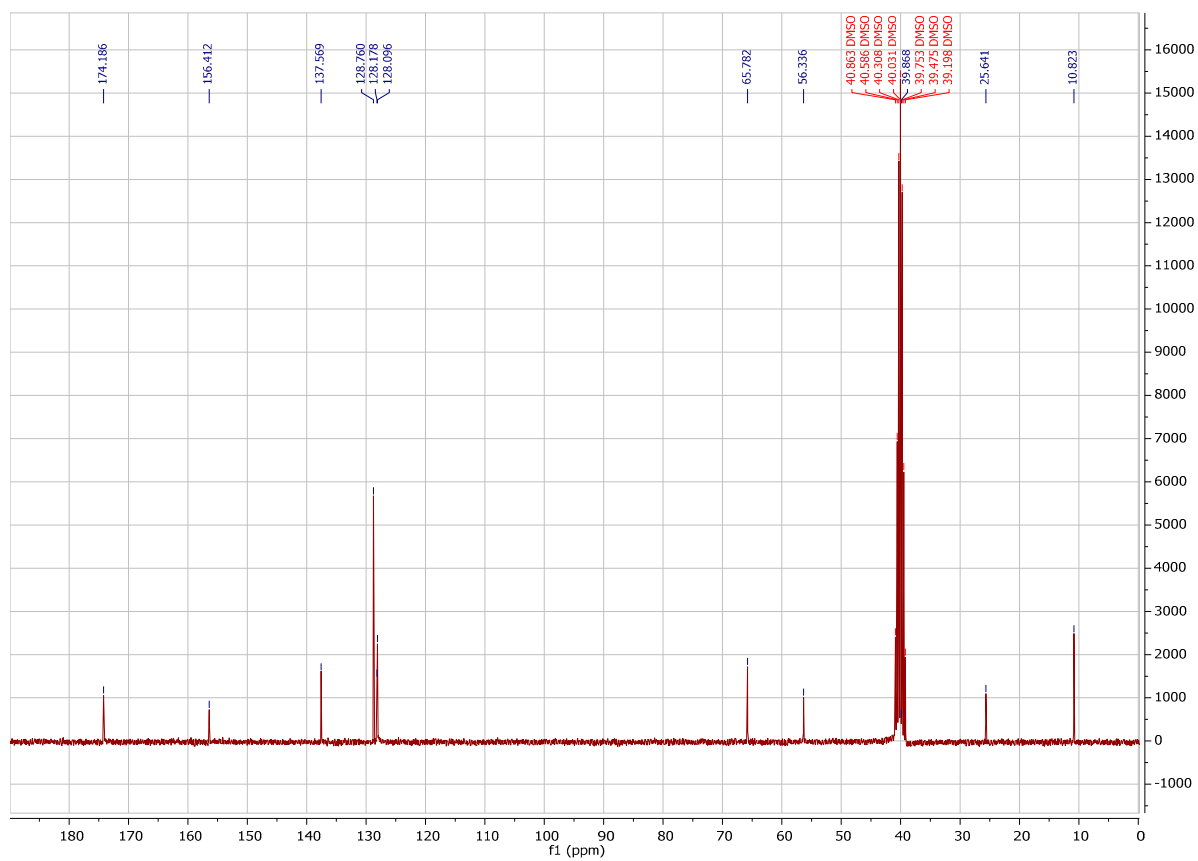

Benzyl-N-[(1S)-1-cyanopropyl]carbamate **8b-L**:

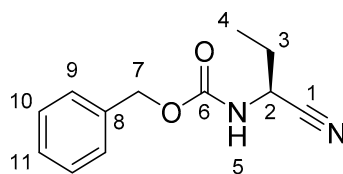

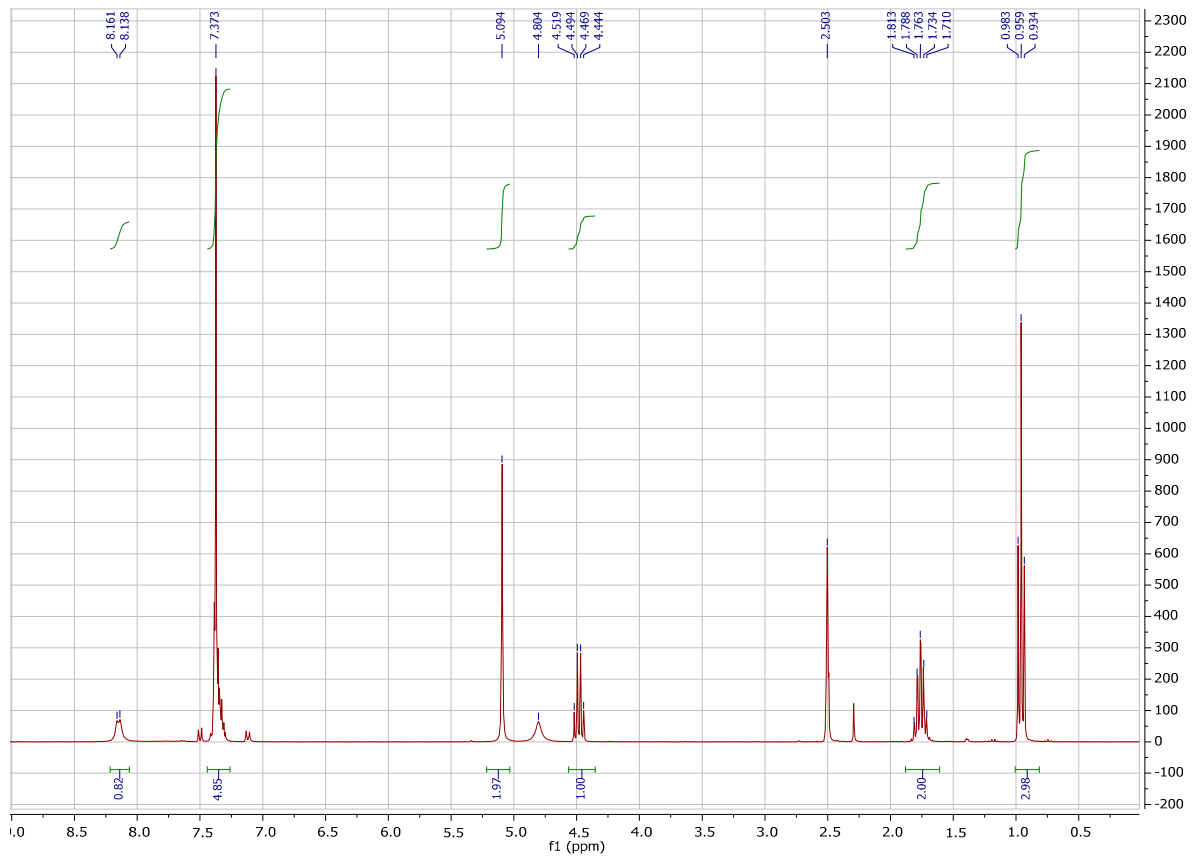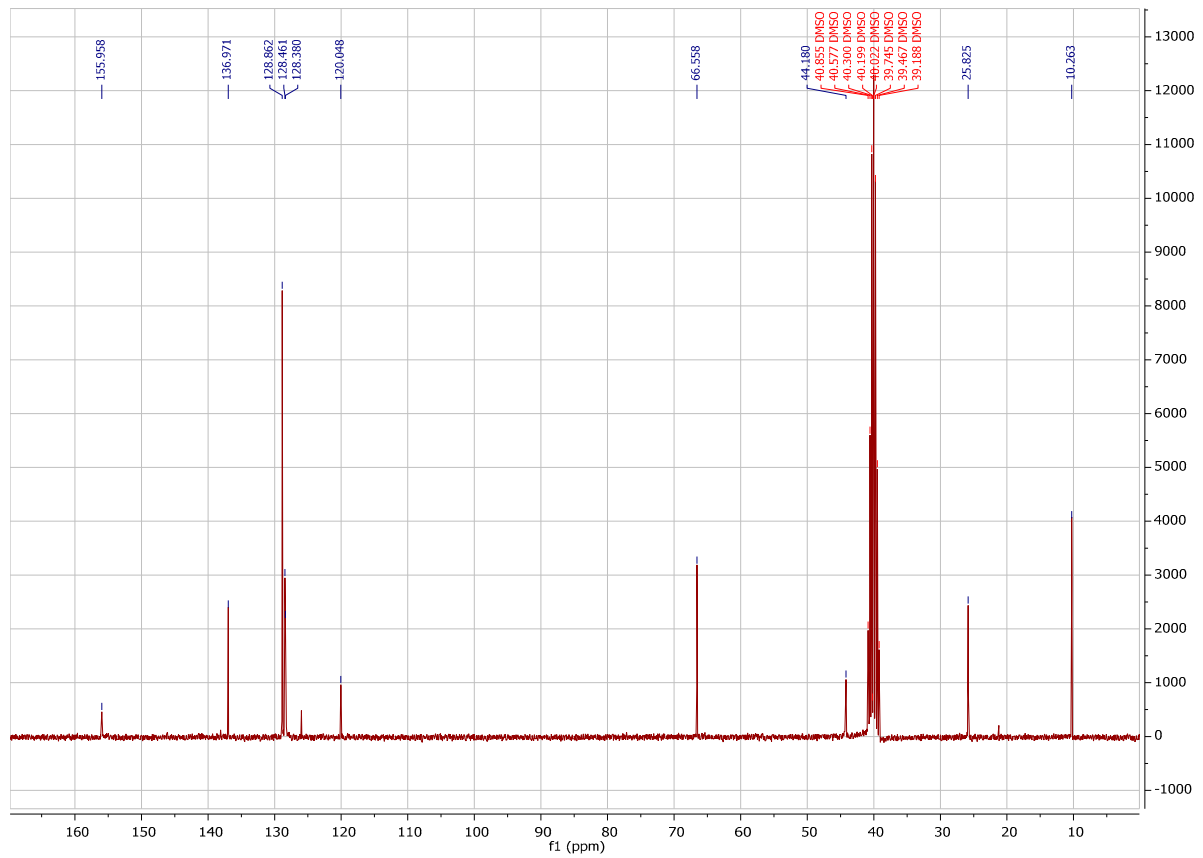

Benzyl-N-[(1S)-1-(1H-1,2,3,4-tetrazol-5-yl)propyl]carbamate **9b-L**:

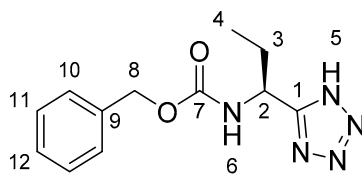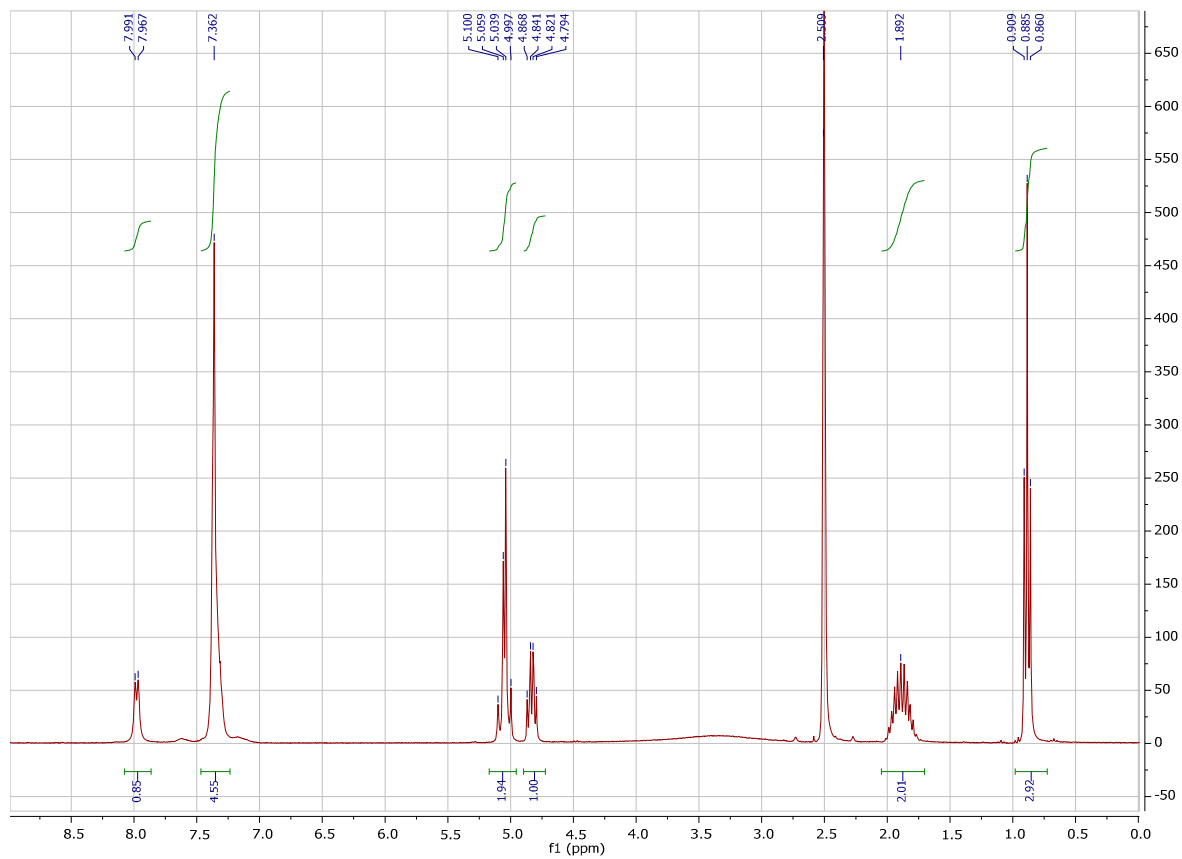

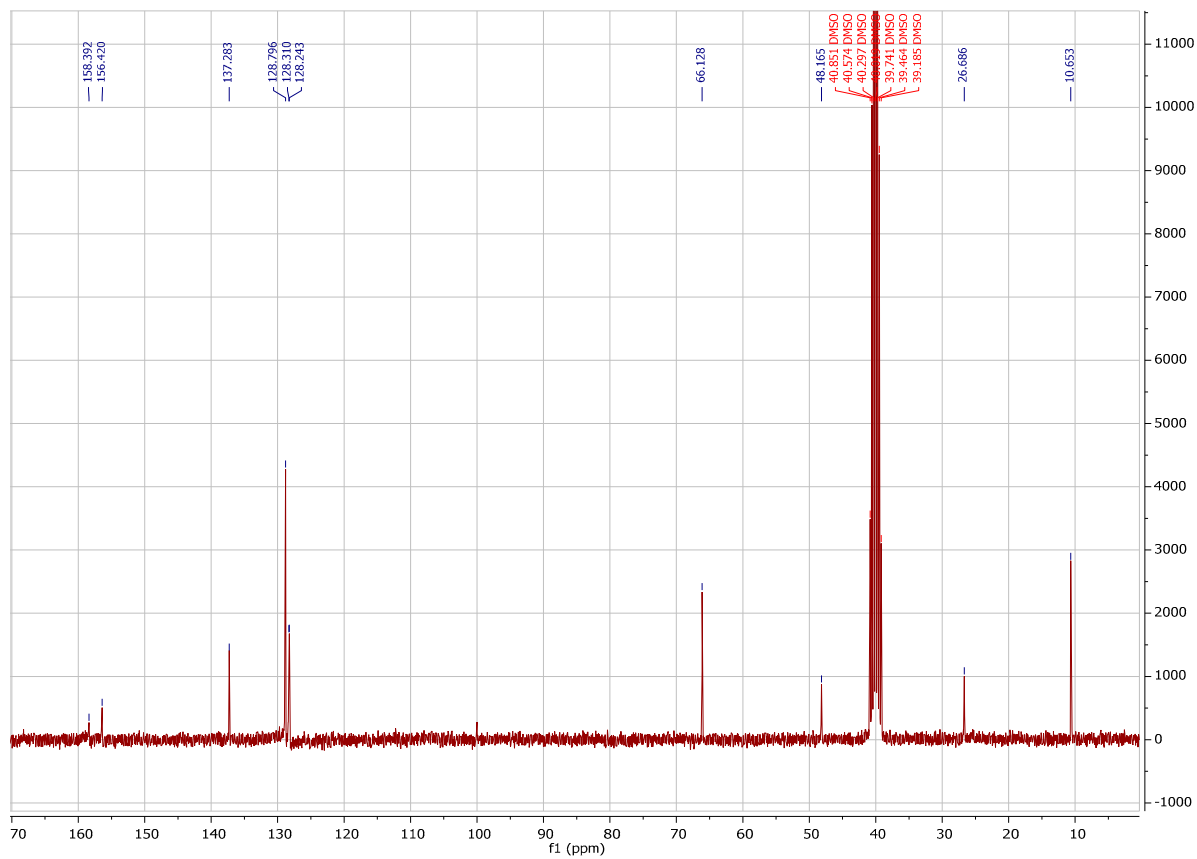

(1S)-1-(1H-1,2,3,4-tetrazol-5-yl)propane-1-amine **4b-L**:

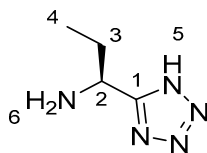

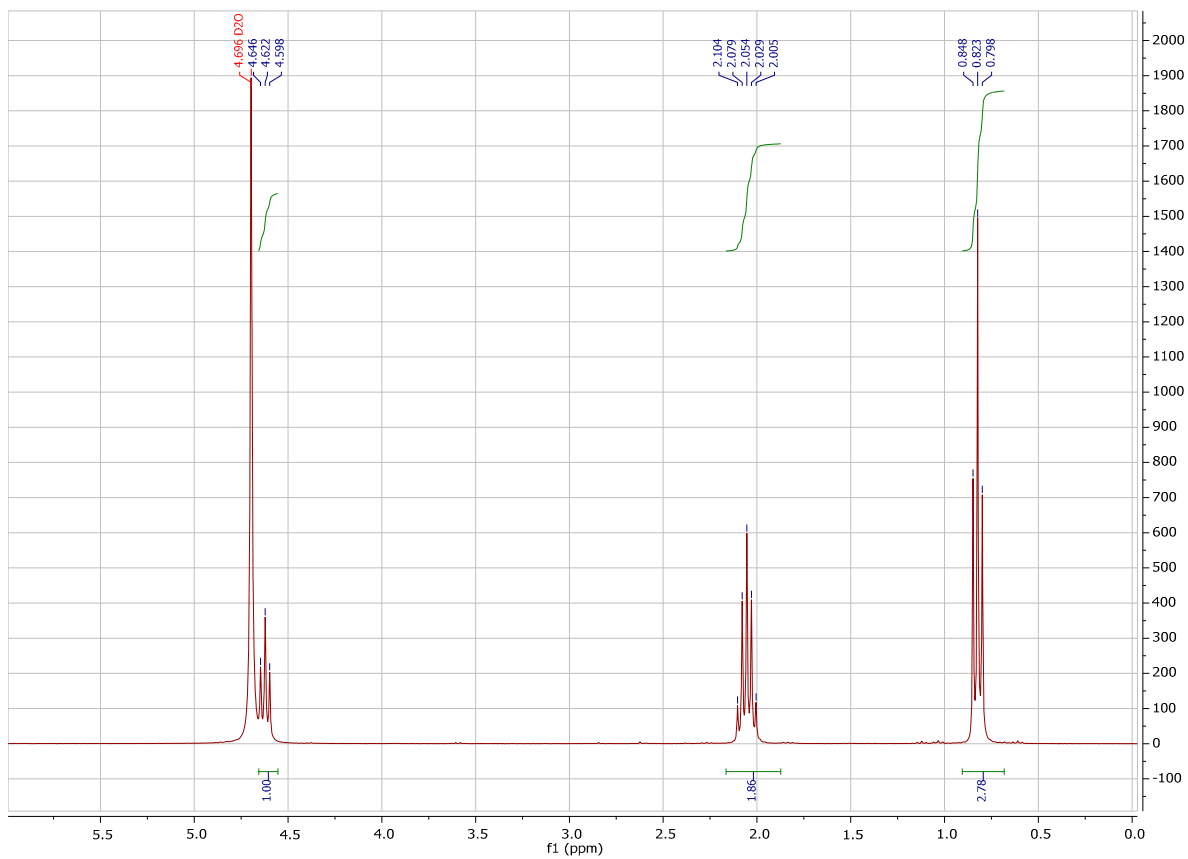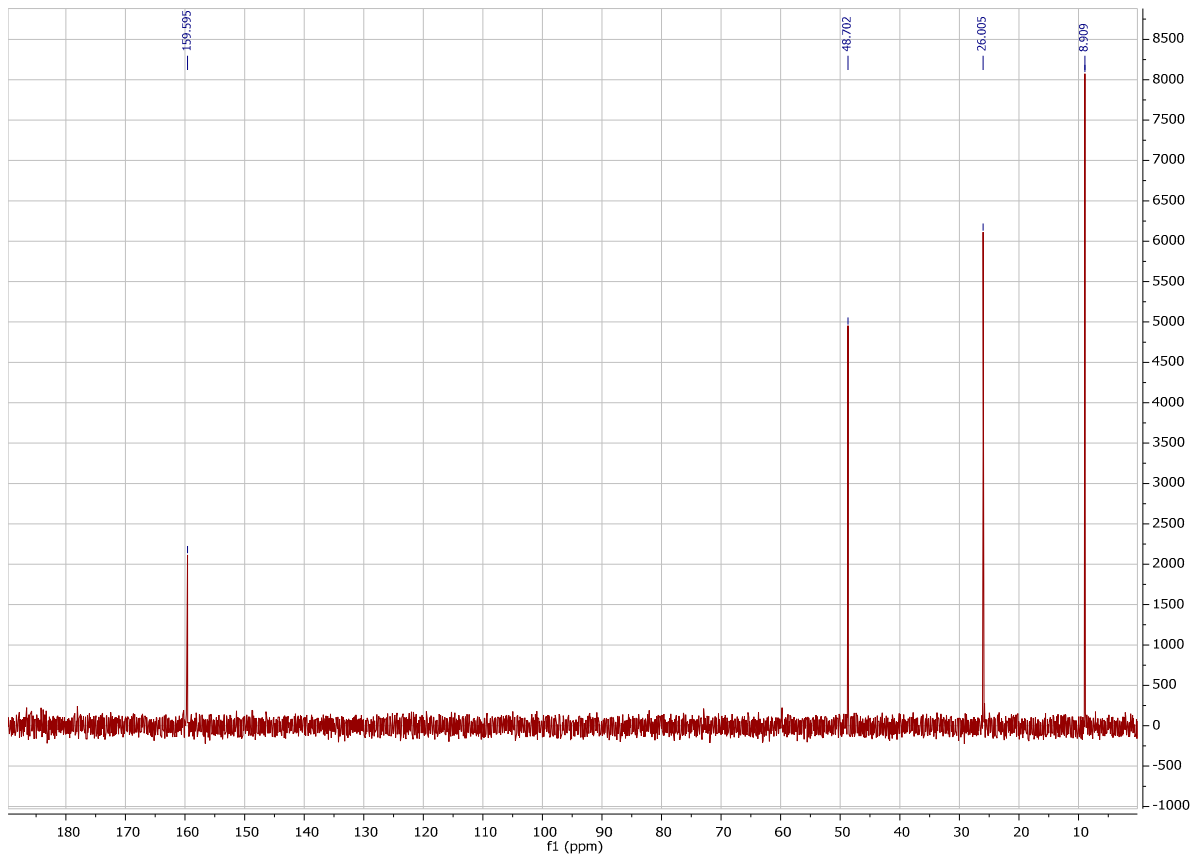

9H-Fluoren-9-ylmethyl-N-[(1S or R)-1-(1H-1,2,3,4-tetrazol-5-yl)ethyl]carbamate **10a**:

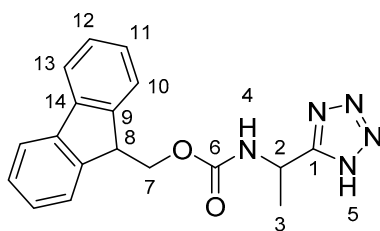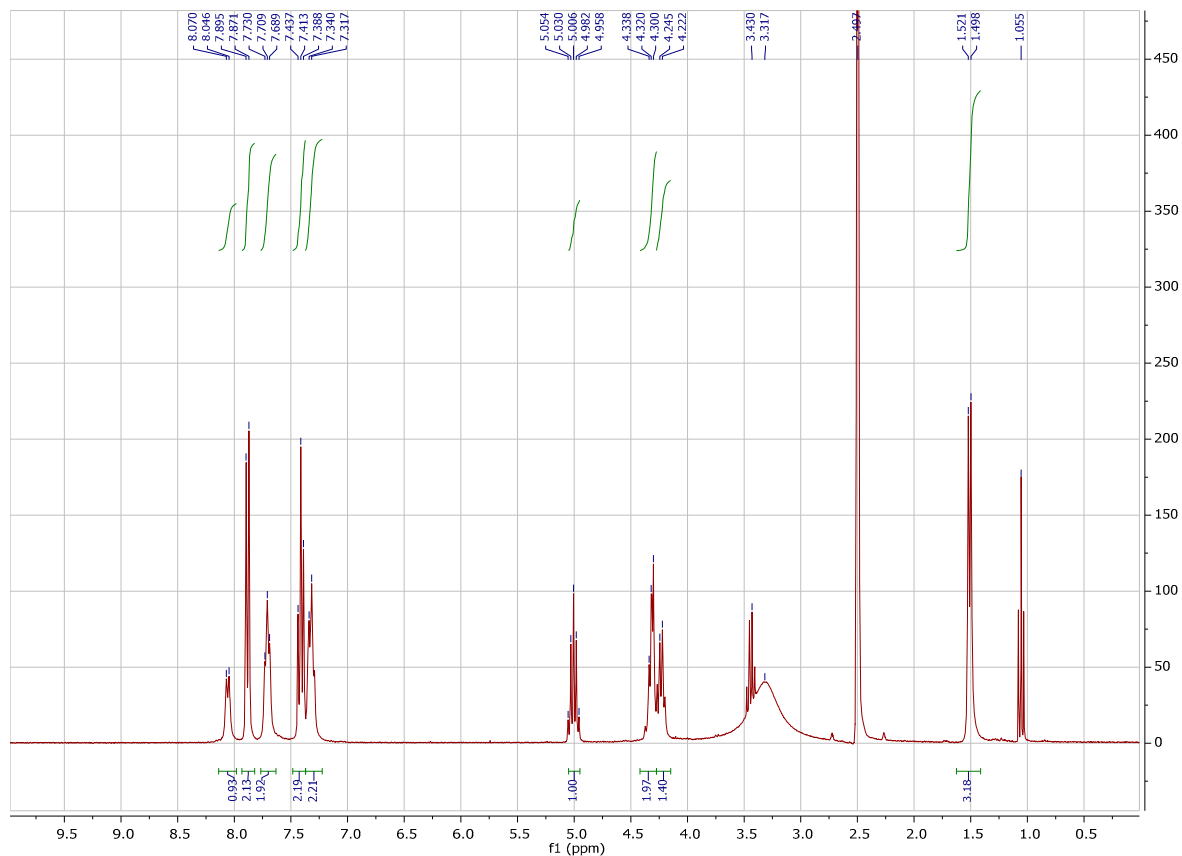



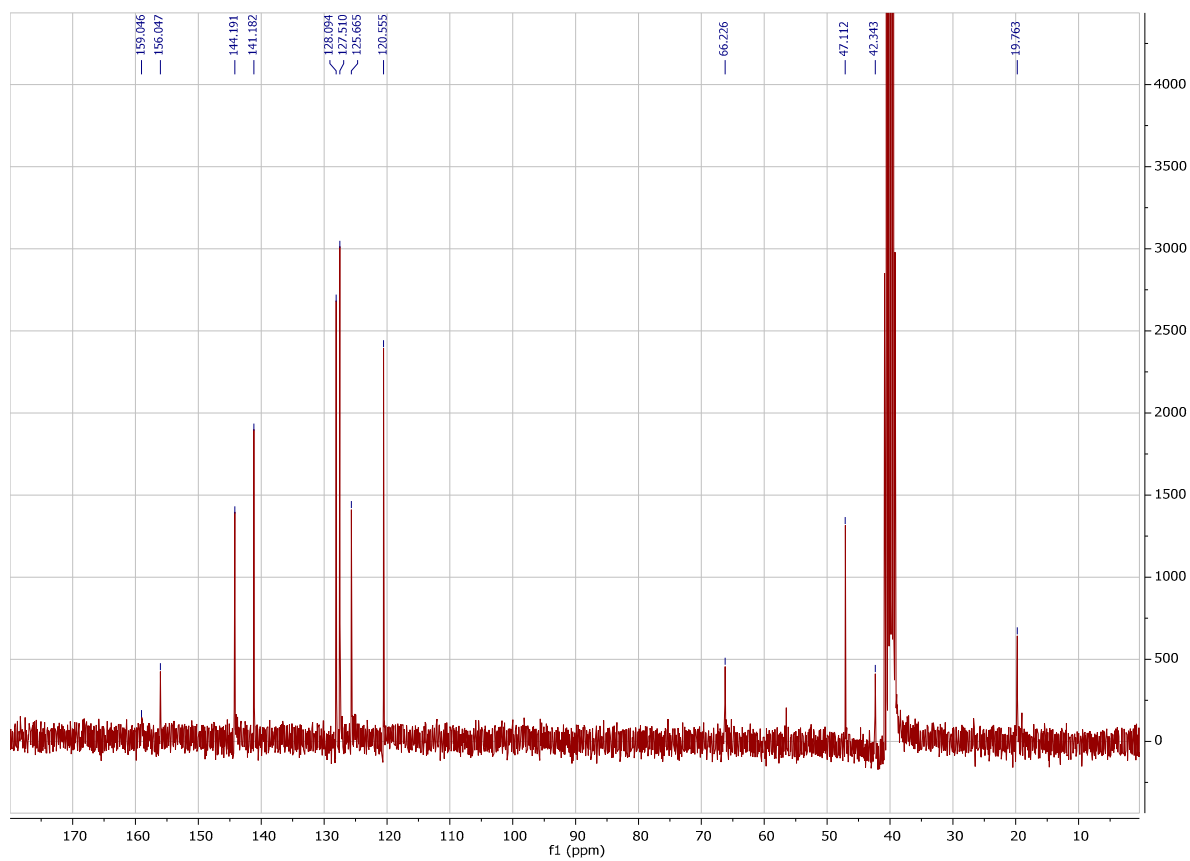

9H-Fluoren-9-ylmethyl-N-[(1S)-1-(1H-1,2,3,4-tetrazol-5-yl)propyl]carbamate **10b-L**

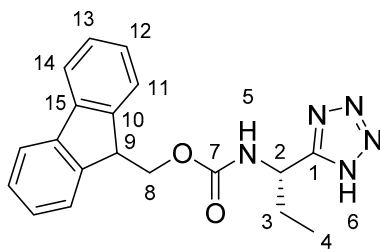

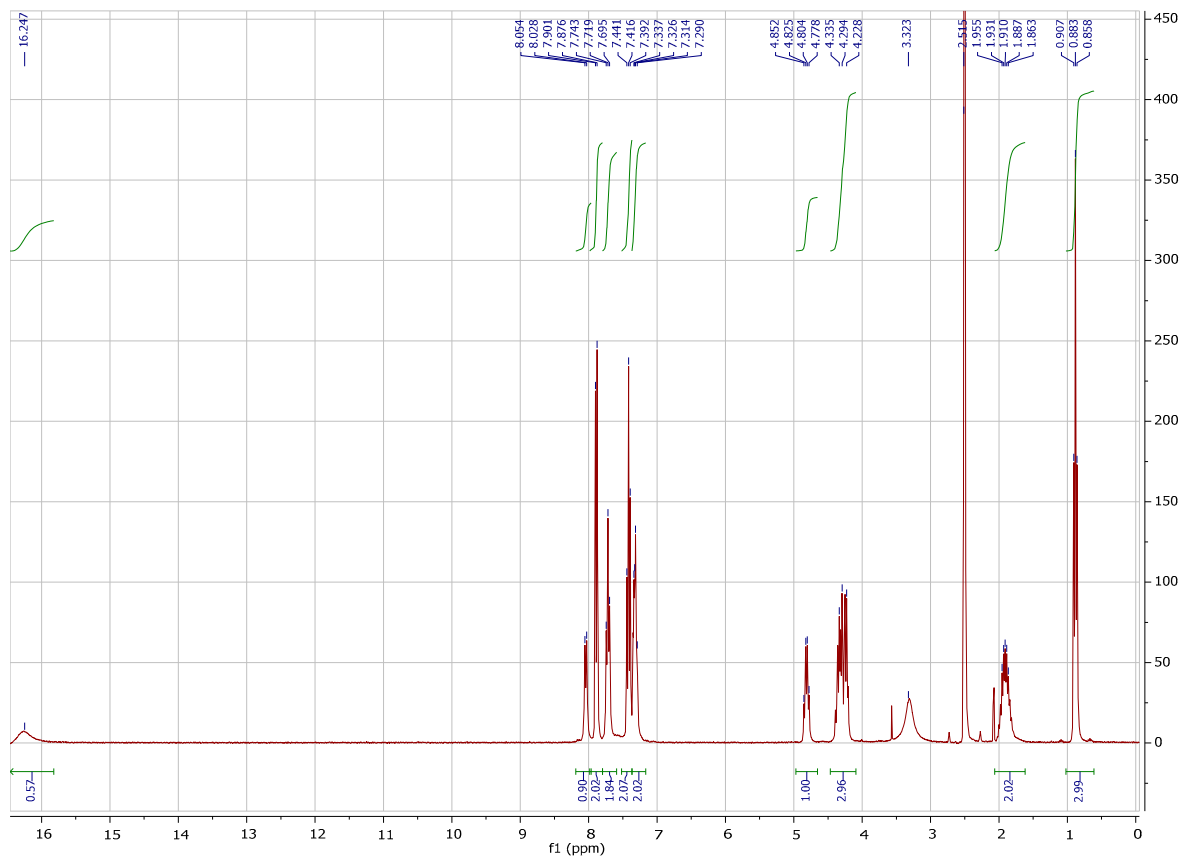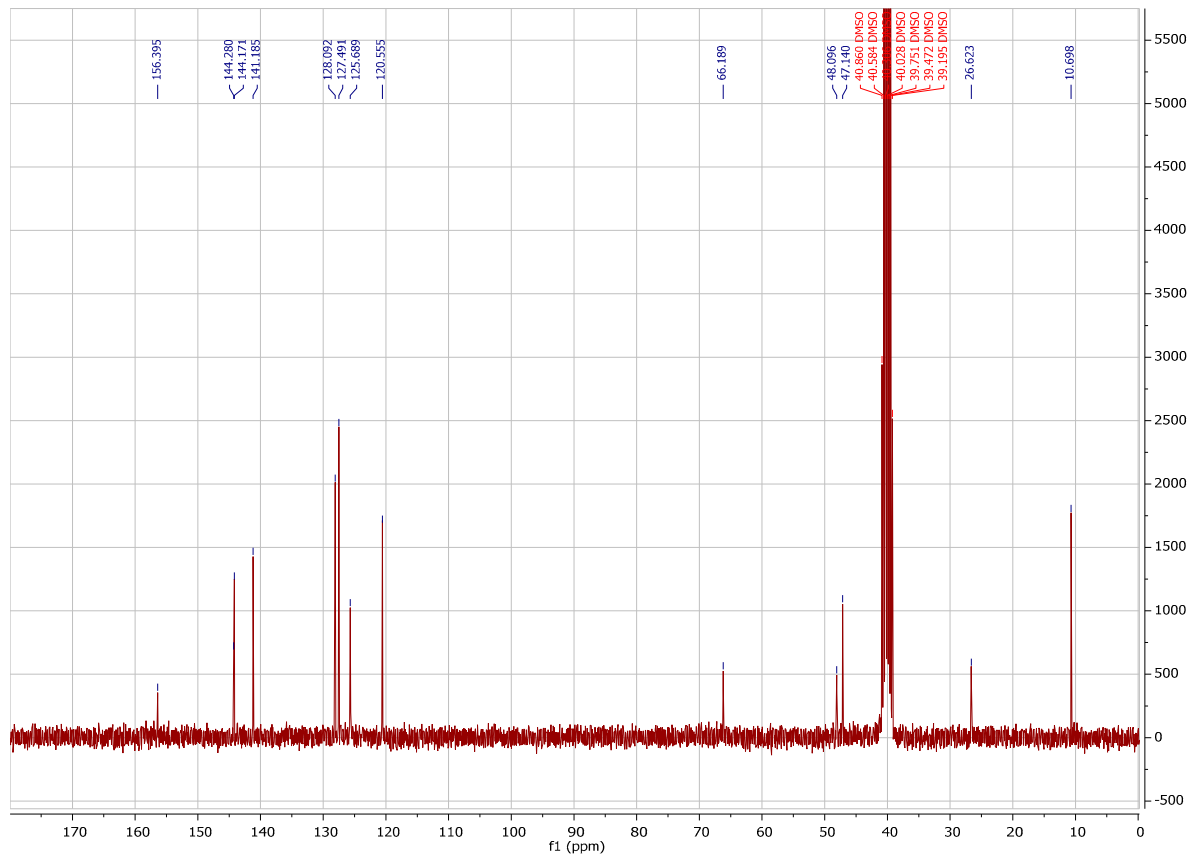

Benzyl-N-(((1S)-1-(1H-1,2,3,4-tetrazol-5-yl)ethyl)carbamoyl)methyl)carbamate **13g-L**:

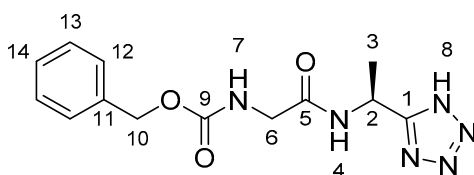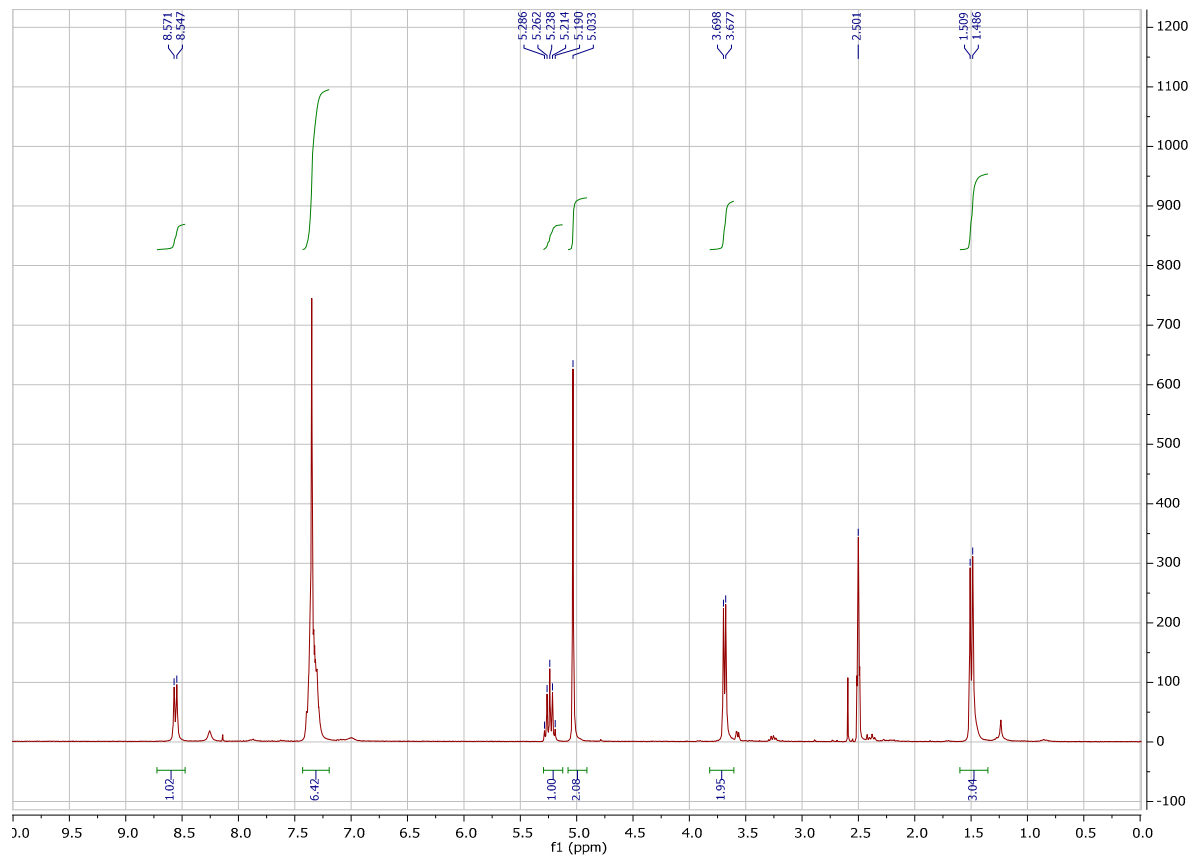

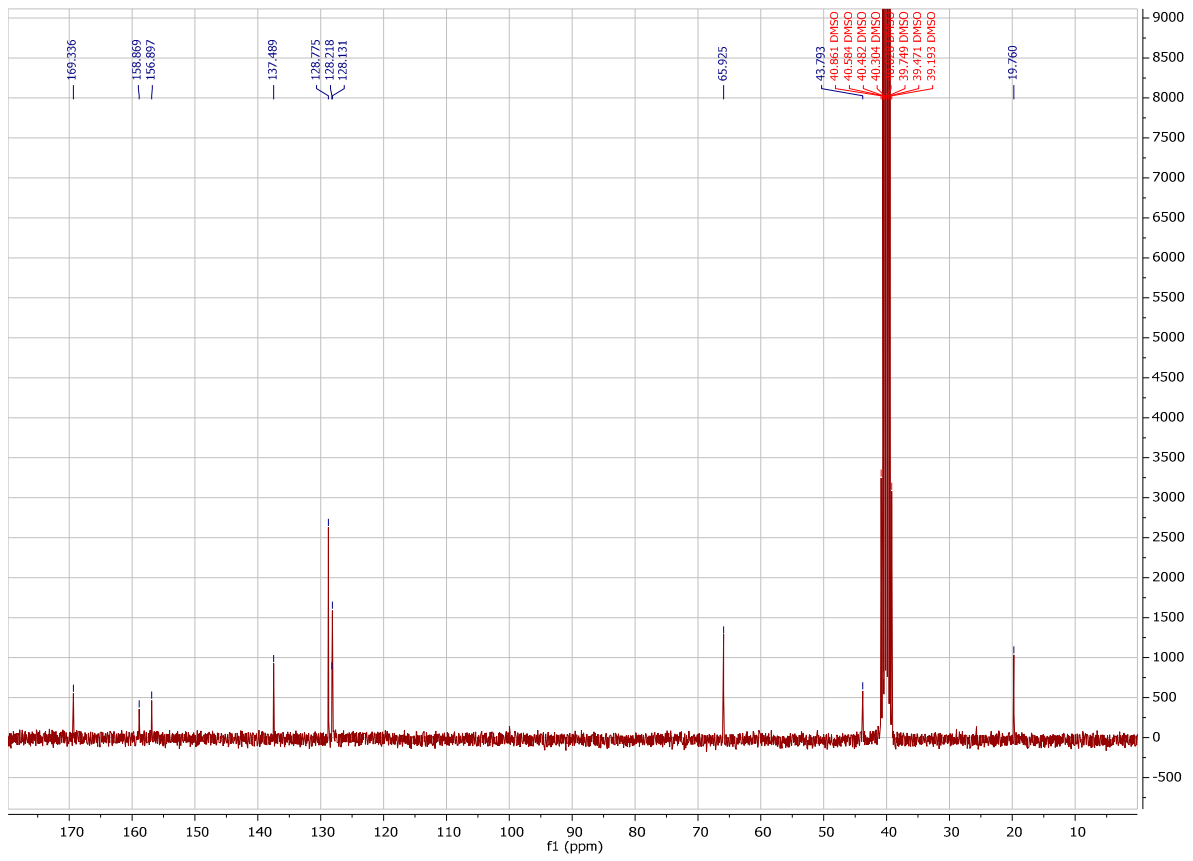

SM: 7G

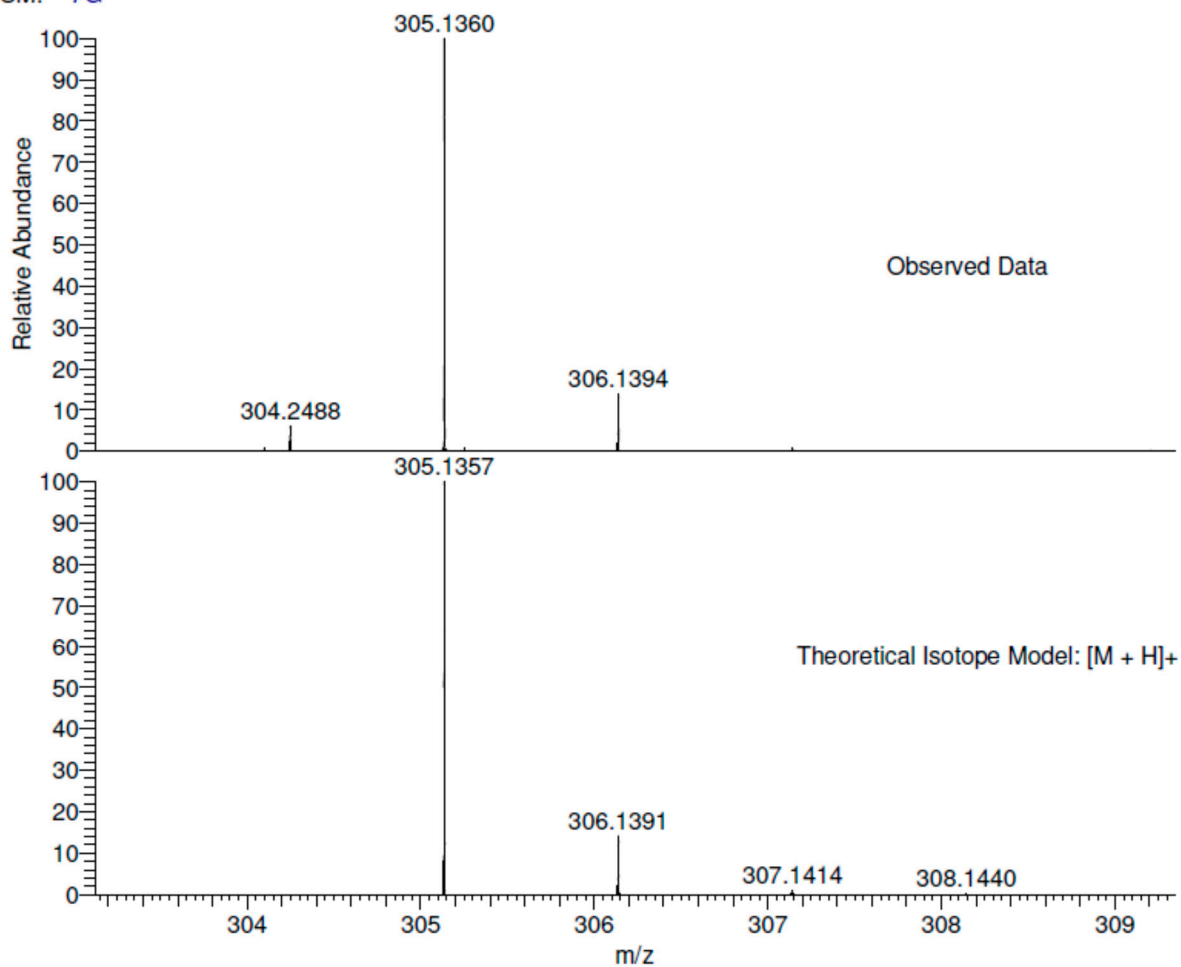

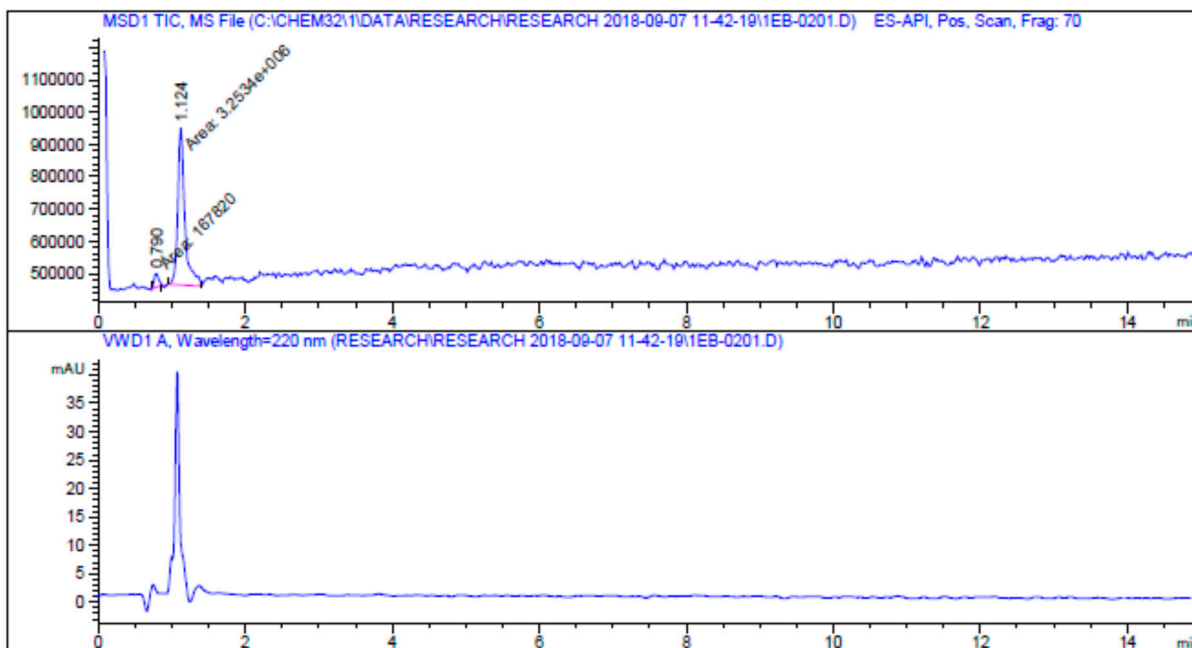

=====  
 Area Percent Report  
 =====

Sorted By : Signal  
 Multiplier: : 1.0000  
 Dilution: : 1.0000  
 Use Multiplier & Dilution Factor with ISTDs

Signal 1: MSD1 TIC, MS File

| Peak # | RetTime [min] | Type | Width [min] | Area      | Height    | Area %  |
|--------|---------------|------|-------------|-----------|-----------|---------|
| 1      | 0.790         | MM   | 0.0623      | 1.67820e5 | 4.49148e4 | 4.9053  |
| 2      | 1.124         | MM   | 0.1104      | 3.25340e6 | 4.91366e5 | 95.0947 |

Totals : 3.42122e6 5.36281e5

2-Amino-N-[(1S)-1-(1H-1,2,3,4-tetrazol-5-yl)ethyl]acetamide **14g-L**:

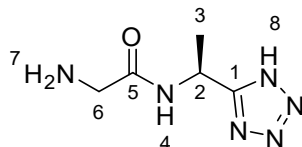

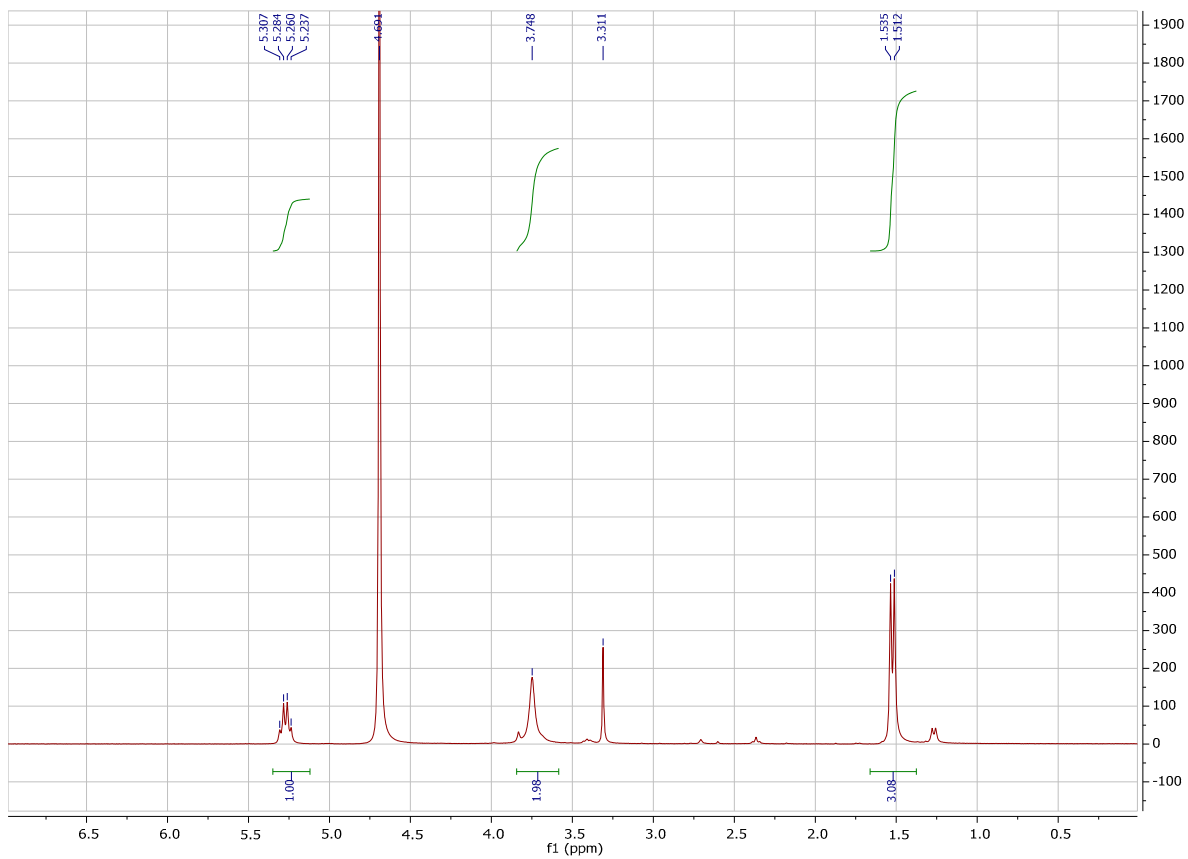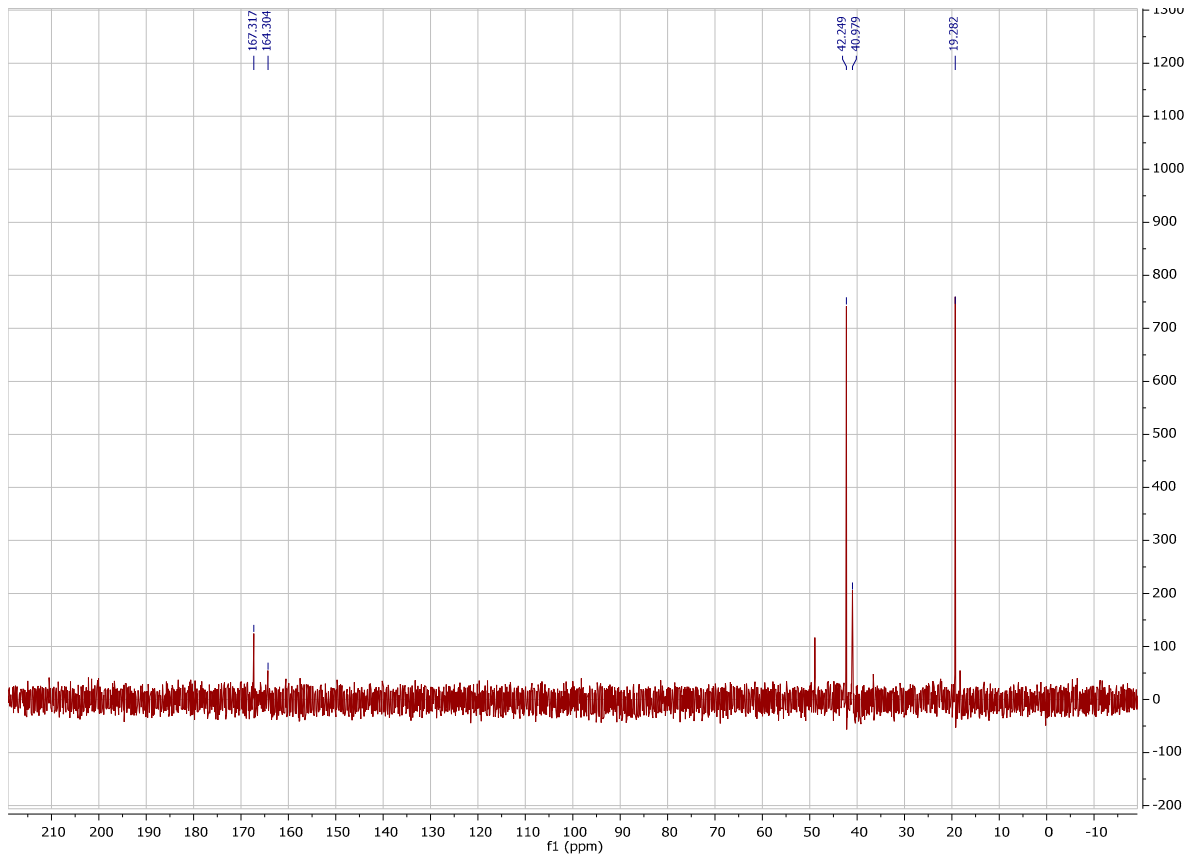

SM: 7G

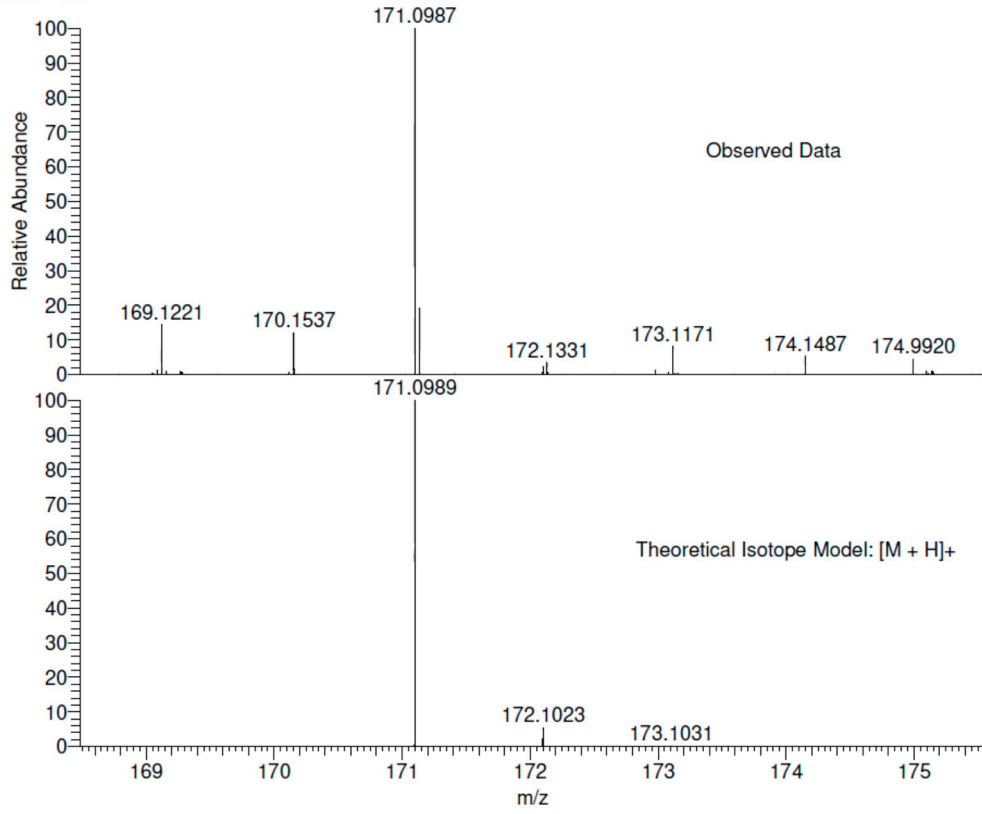



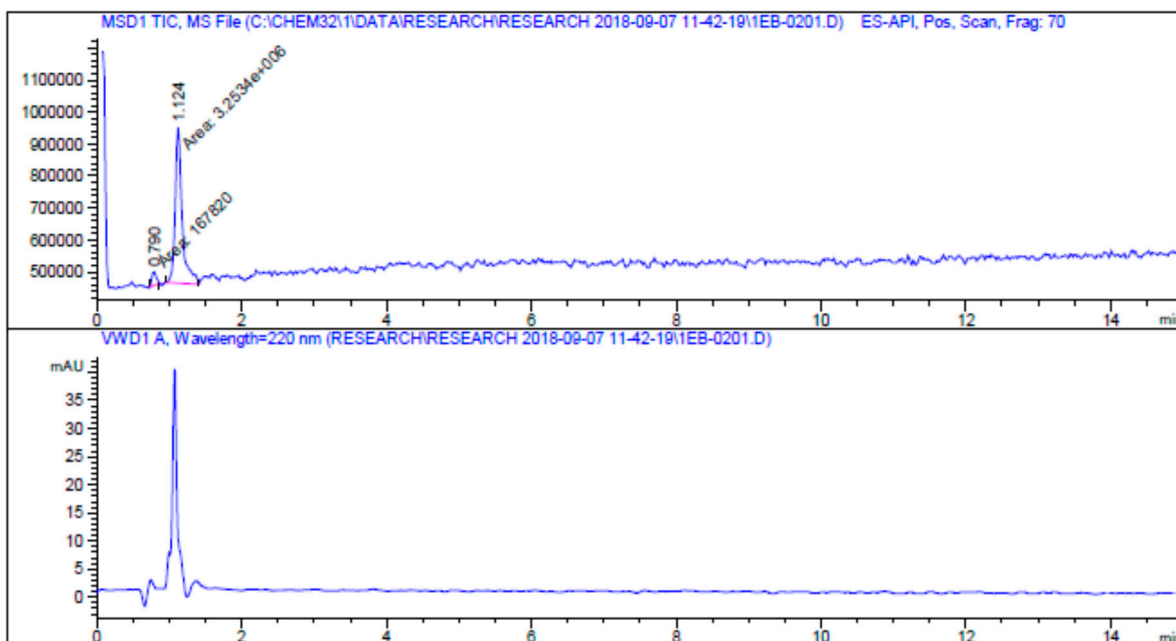

=====  
 Area Percent Report  
 =====

Sorted By : Signal  
 Multiplier: : 1.0000  
 Dilution: : 1.0000  
 Use Multiplier & Dilution Factor with ISTDs

Signal 1: MSD1 TIC, MS File

| Peak # | RetTime [min] | Type | Width [min] | Area      | Height    | Area %  |
|--------|---------------|------|-------------|-----------|-----------|---------|
| 1      | 0.790         | MM   | 0.0623      | 1.67820e5 | 4.49148e4 | 4.9053  |
| 2      | 1.124         | MM   | 0.1104      | 3.25340e6 | 4.91366e5 | 95.0947 |

Totals : 3.42122e6 5.36281e5

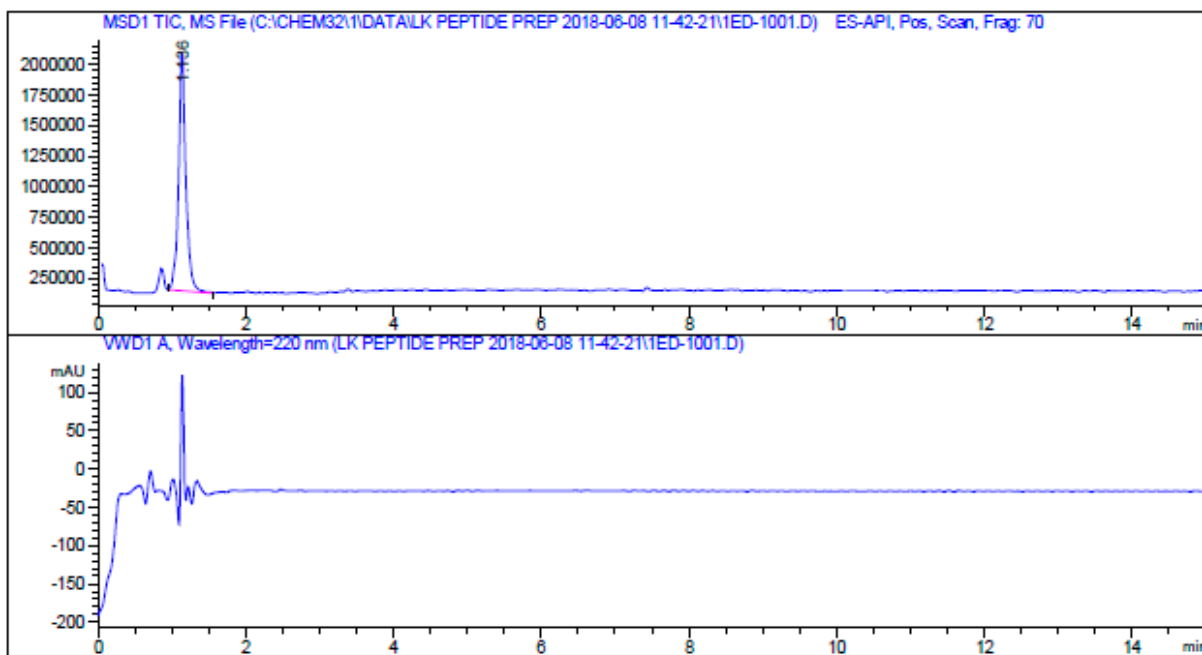

=====  
 Area Percent Report  
 =====

Sorted By : Signal  
 Multiplier: : 1.0000  
 Dilution: : 1.0000  
 Use Multiplier & Dilution Factor with ISTDs

Signal 1: MSD1 TIC, MS File

| Peak # | RetTime [min] | Type | Width [min] | Area      | Height    | Area %   |
|--------|---------------|------|-------------|-----------|-----------|----------|
| 1      | 1.136         | BB   | 0.1009      | 1.34913e7 | 1.99147e6 | 100.0000 |

Totals : 1.34913e7 1.99147e6

Benzyl-N-[(1S)-1-[(1S)-1-(1H-1,2,3,4-tetrazol-5-yl)ethyl]carbamoyl]ethyl]carbamate **13a-LL**:

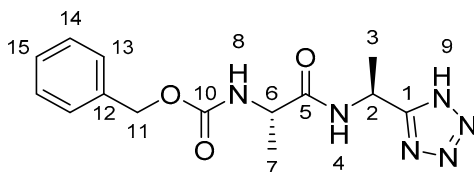

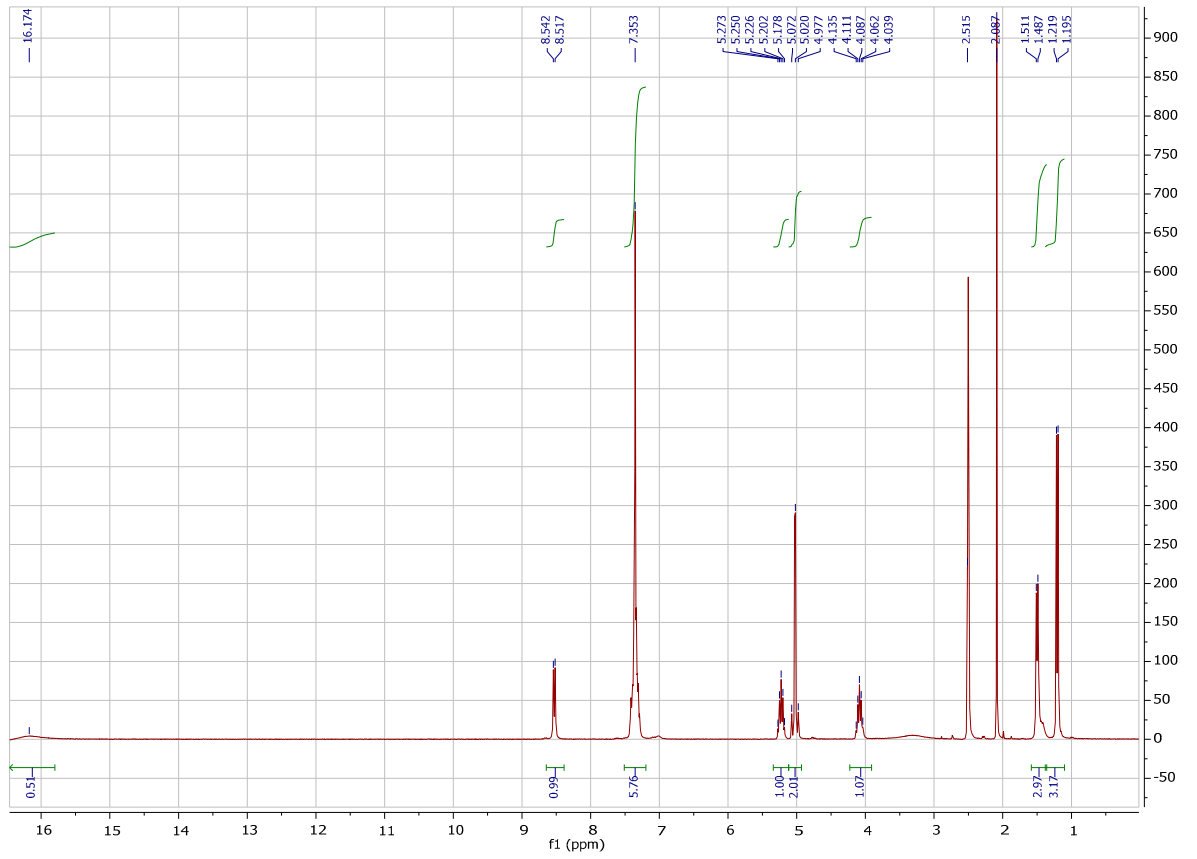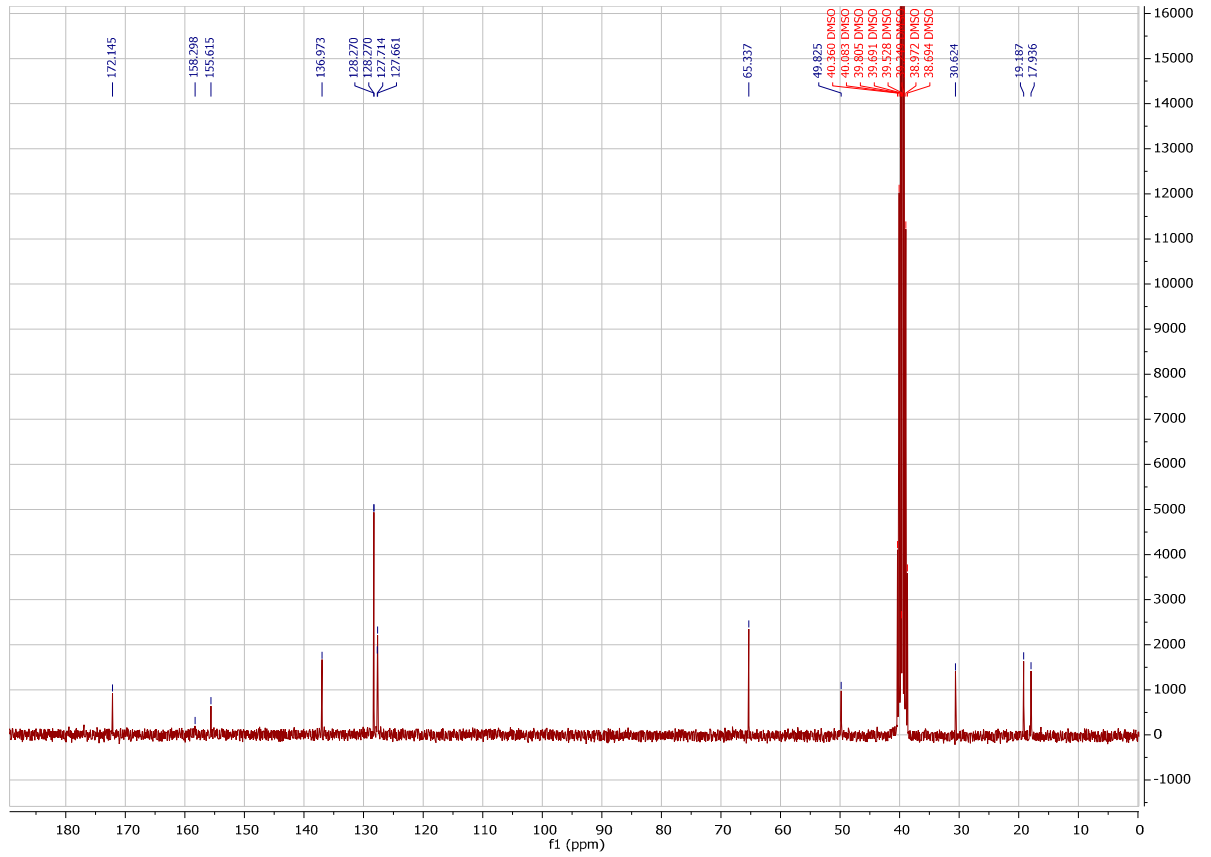

(2*S*)-2-amino-*N*-[(1*S*)-1-(1*H*-1,2,3,4-tetrazol-5-yl)ethyl]propanamide **14a-LL**:

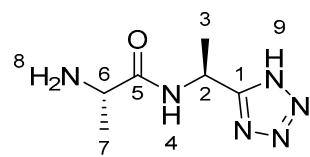

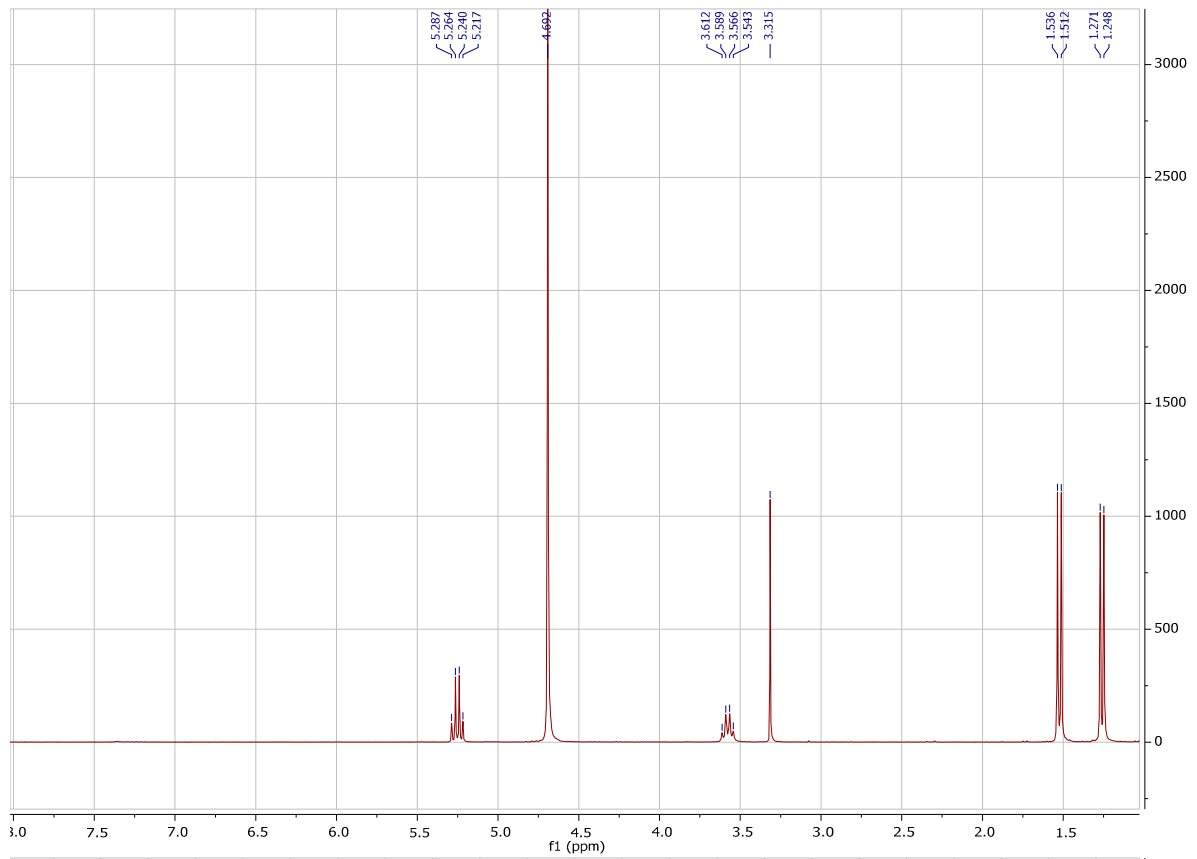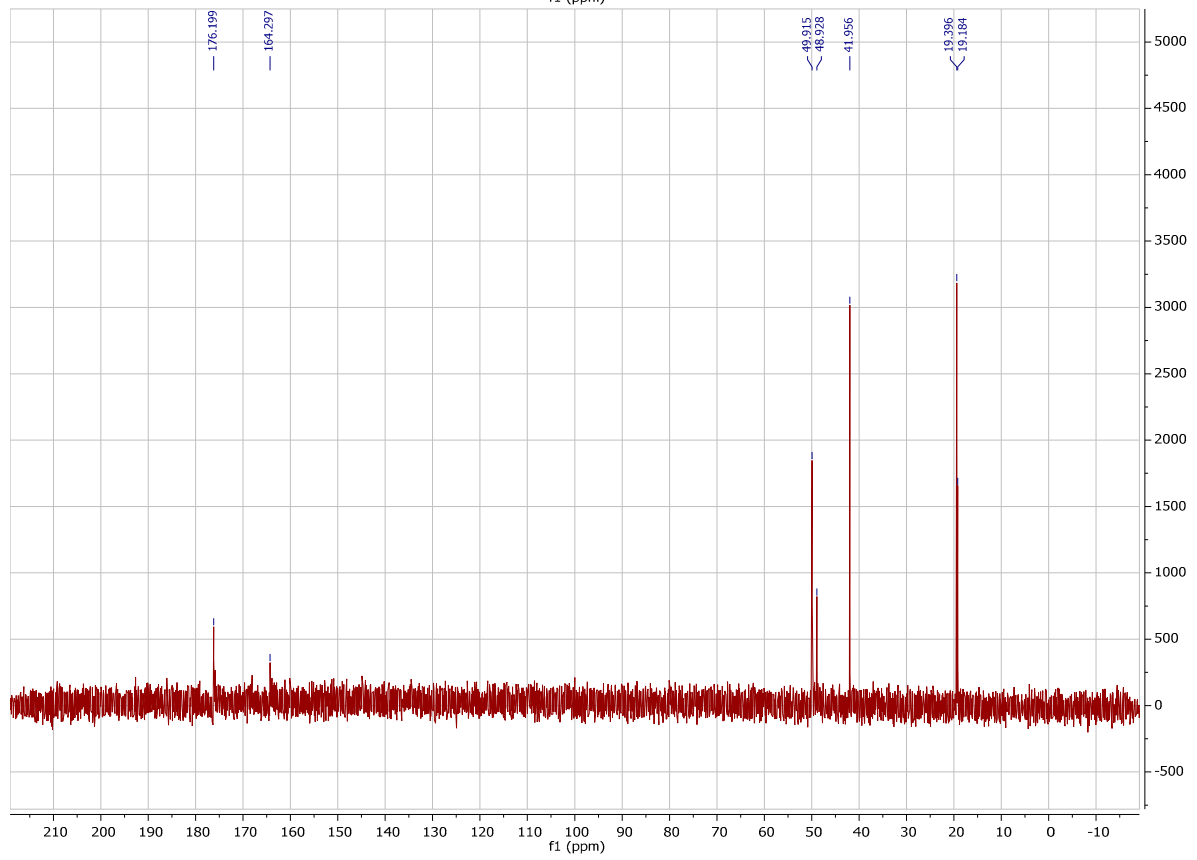

SM: 7G

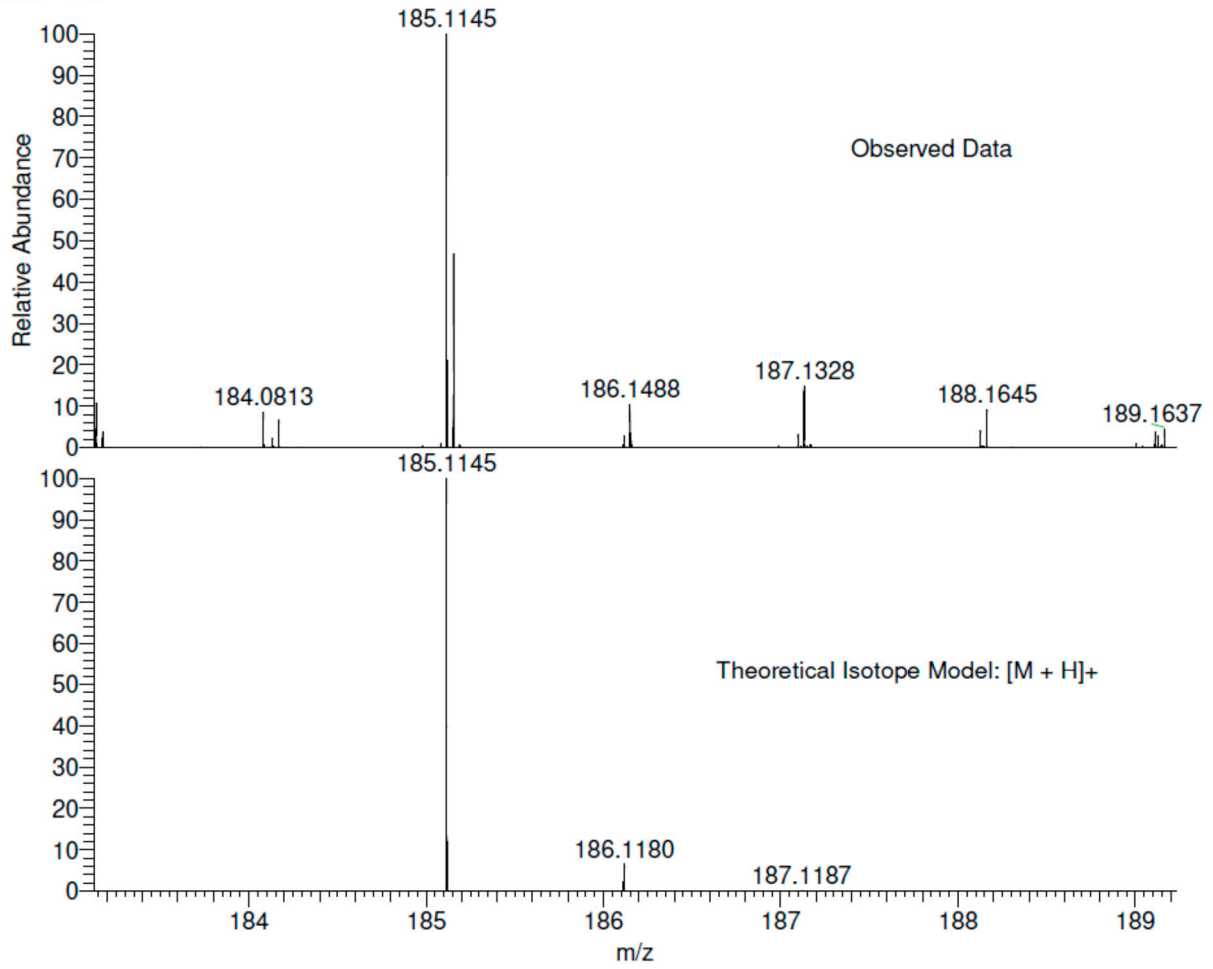

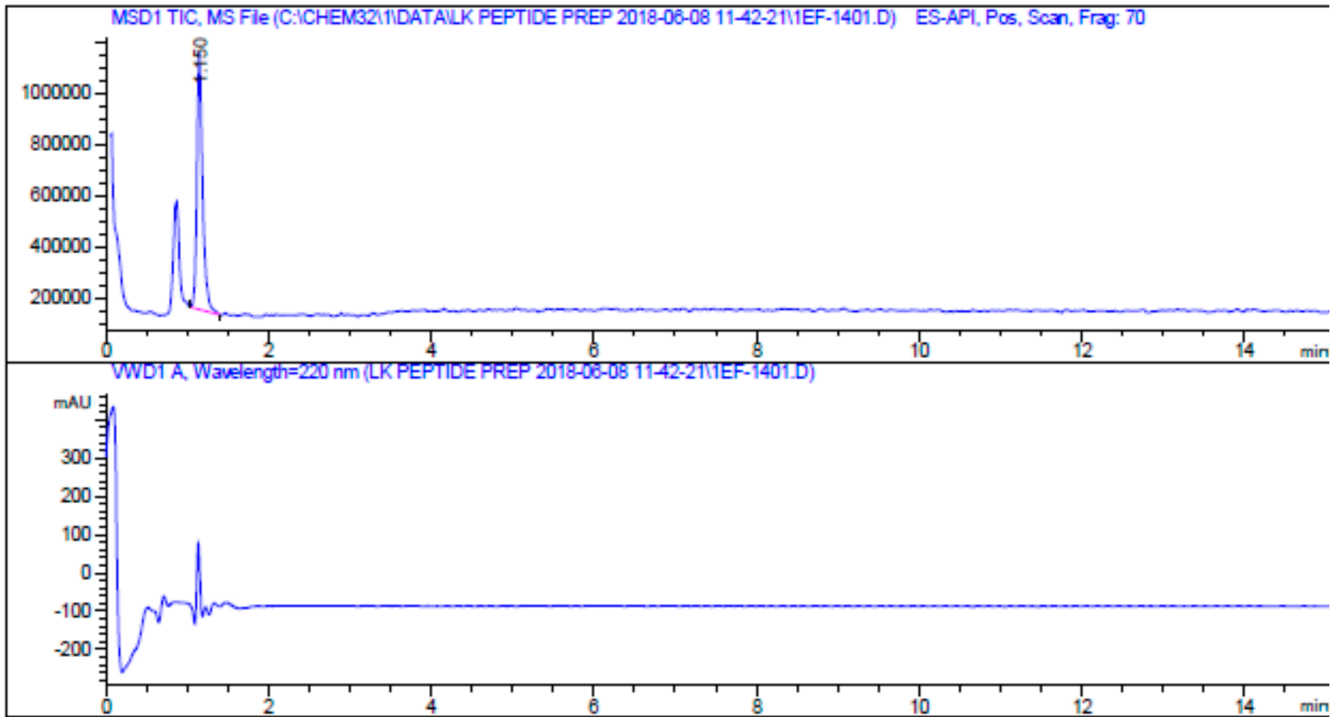

=====  
 Area Percent Report  
 =====

Sorted By : Signal  
 Multiplier: : 1.0000  
 Dilution: : 1.0000  
 Use Multiplier & Dilution Factor with ISTDs

Signal 1: MSD1 TIC, MS File

| Peak # | RetTime [min] | Type | Width [min] | Area      | Height    | Area %   |
|--------|---------------|------|-------------|-----------|-----------|----------|
| 1      | 1.150         | BB   | 0.0730      | 4.93549e6 | 1.01672e6 | 100.0000 |

Totals : 4.93549e6 1.01672e6

Benzyl-*N*-[(1*S*)-1-[(1*R*)-1-(1*H*-1,2,3,4-tetrazol-5-yl)ethyl]carbamoyl]ethyl]carbamate **13a-LD**:

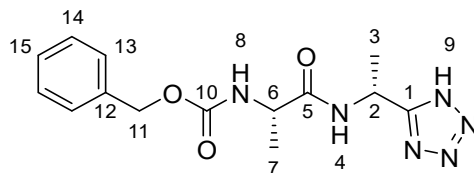

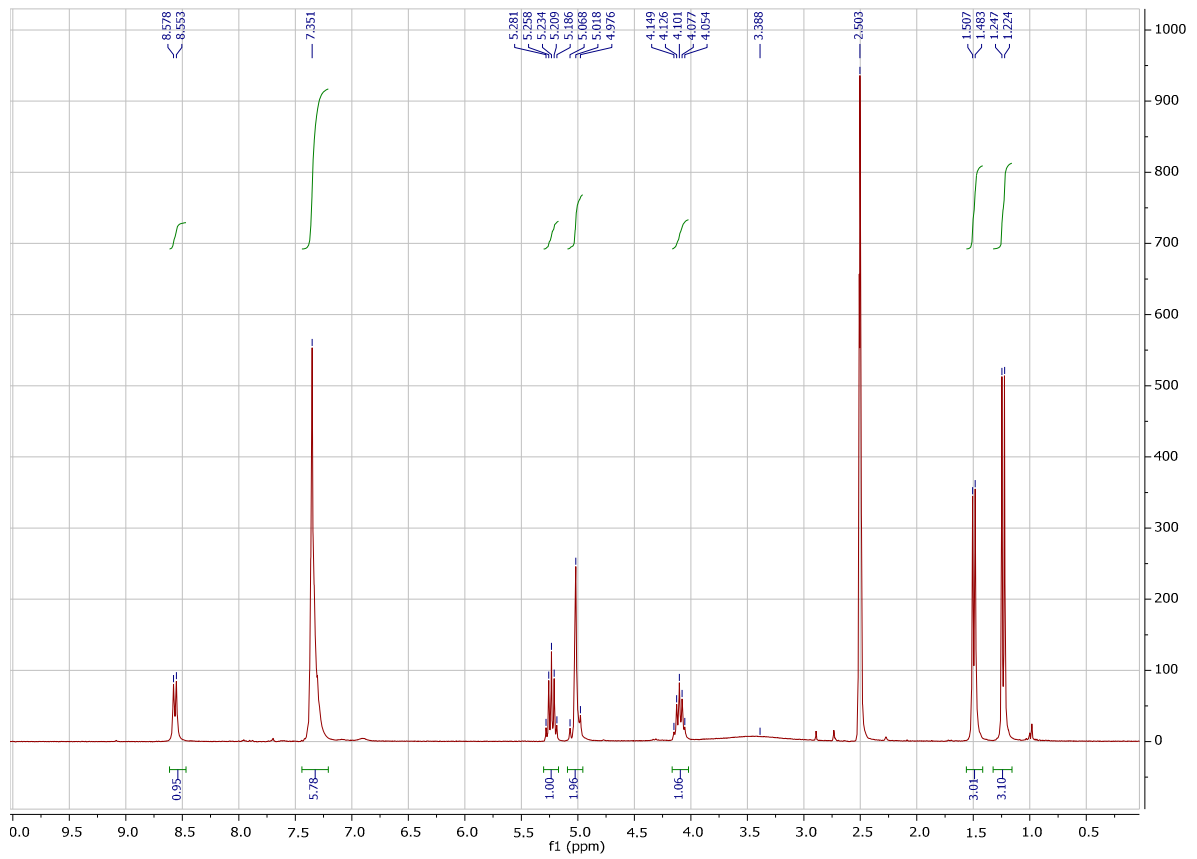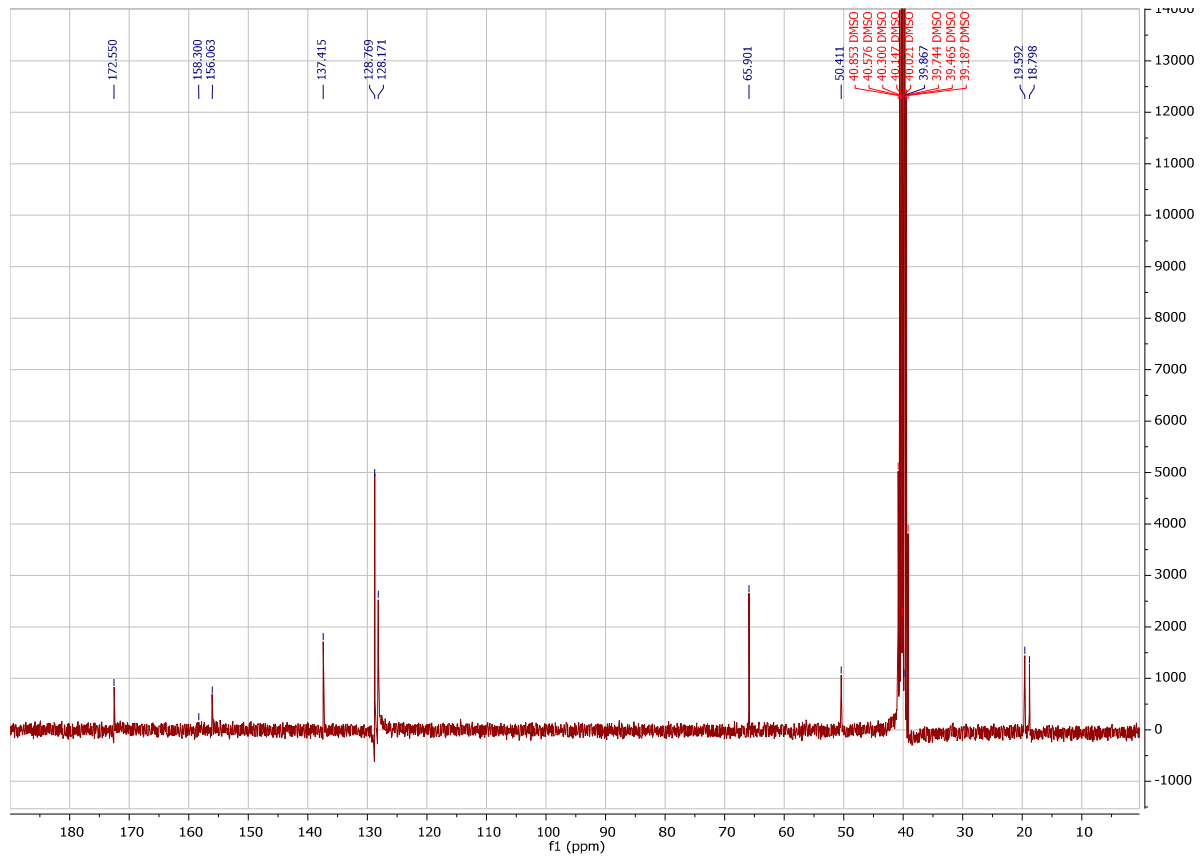



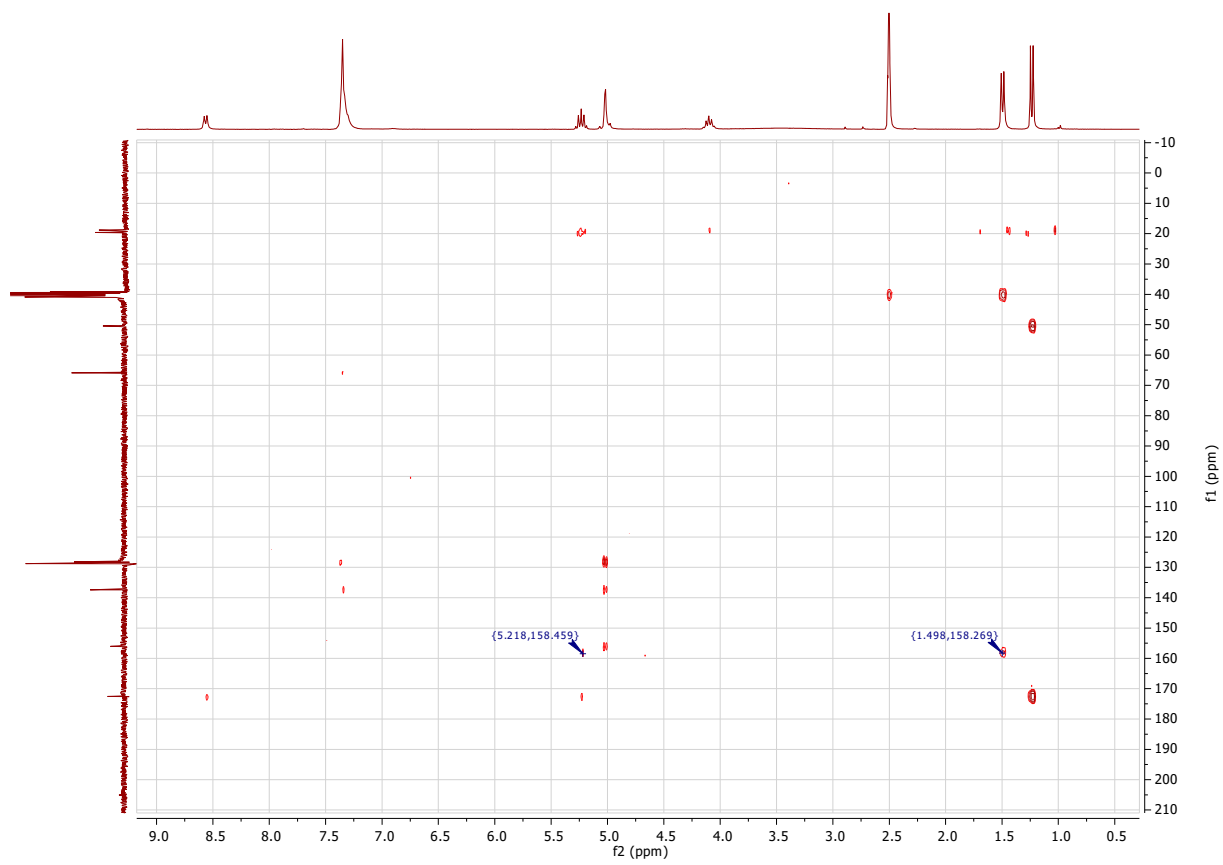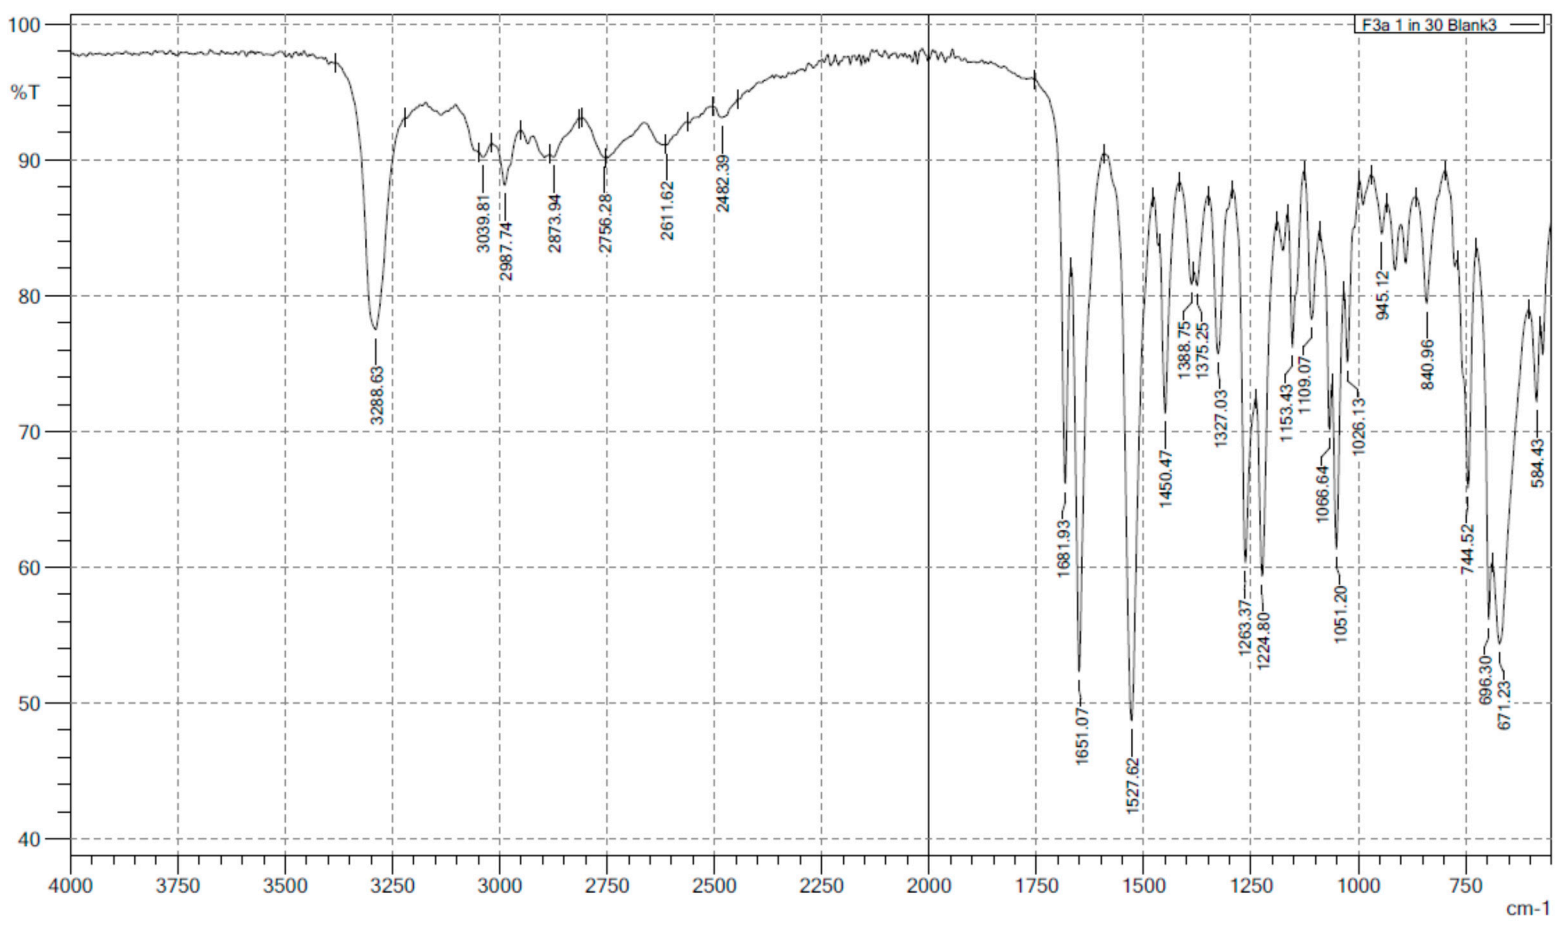

(2S)-2-amino-N-[(1R)-1-(1H-1,2,3,4-tetrazol-5-yl)ethyl]propanamide **14a-LD**:

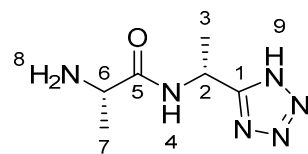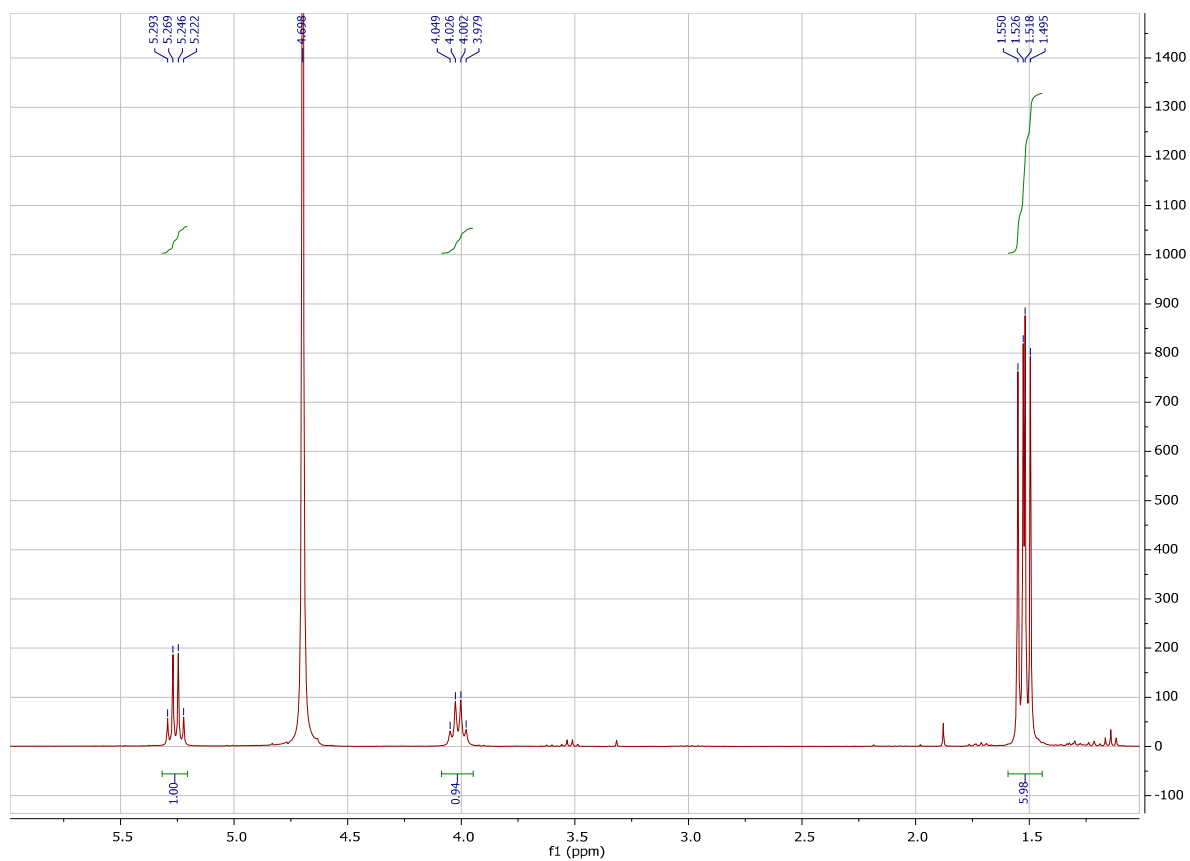

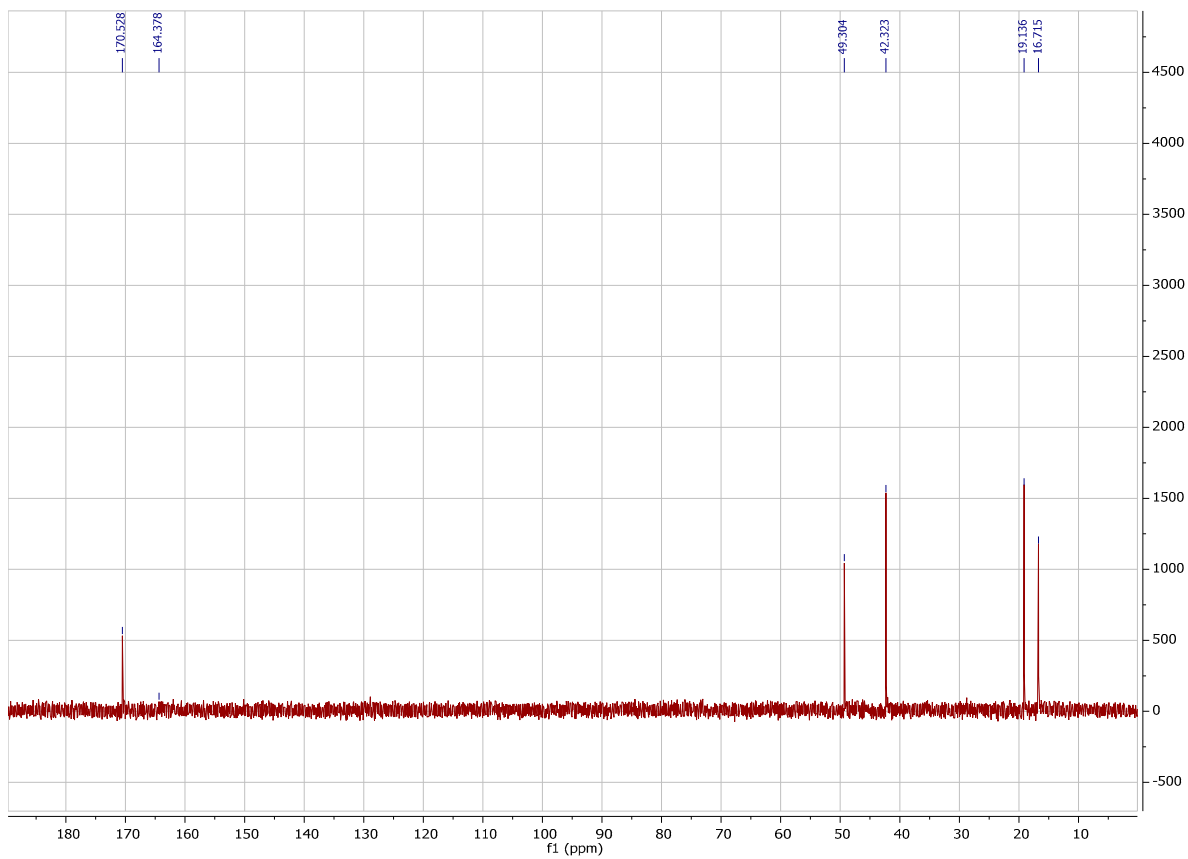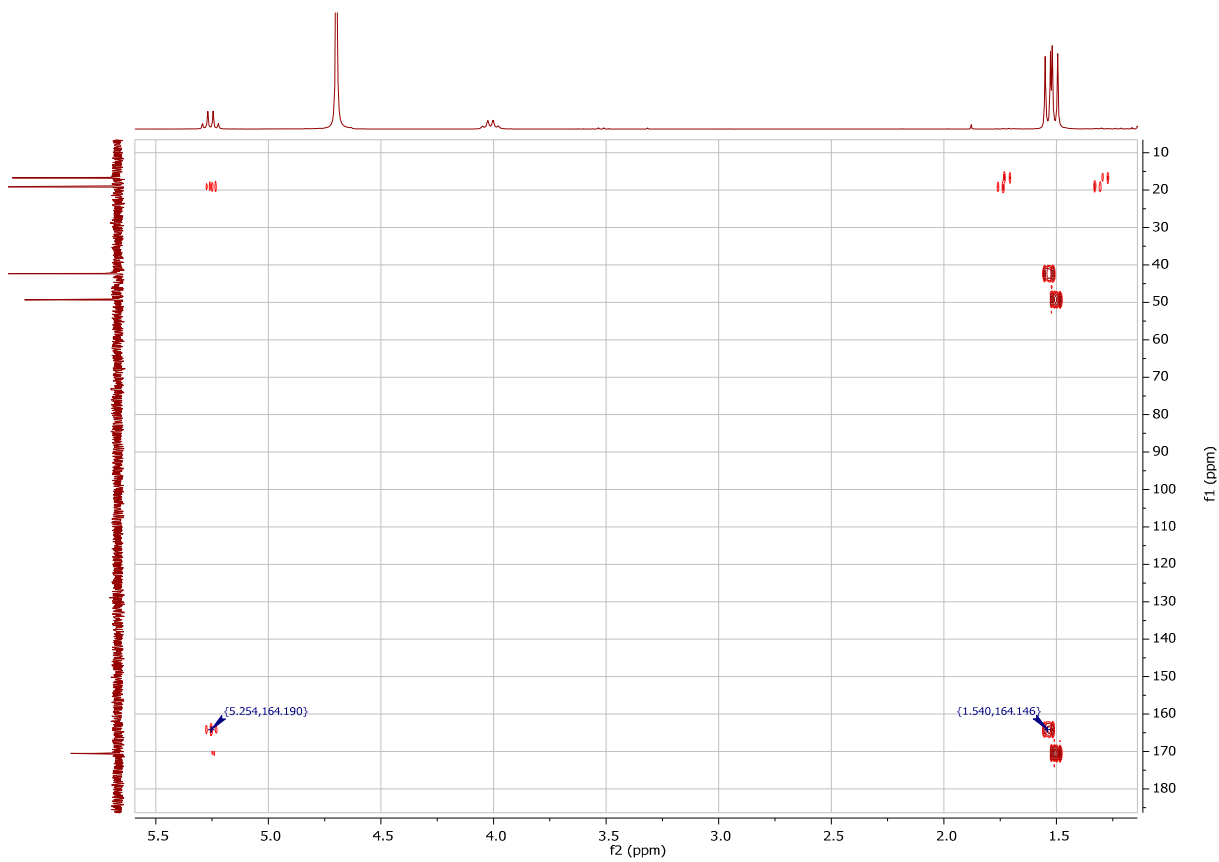

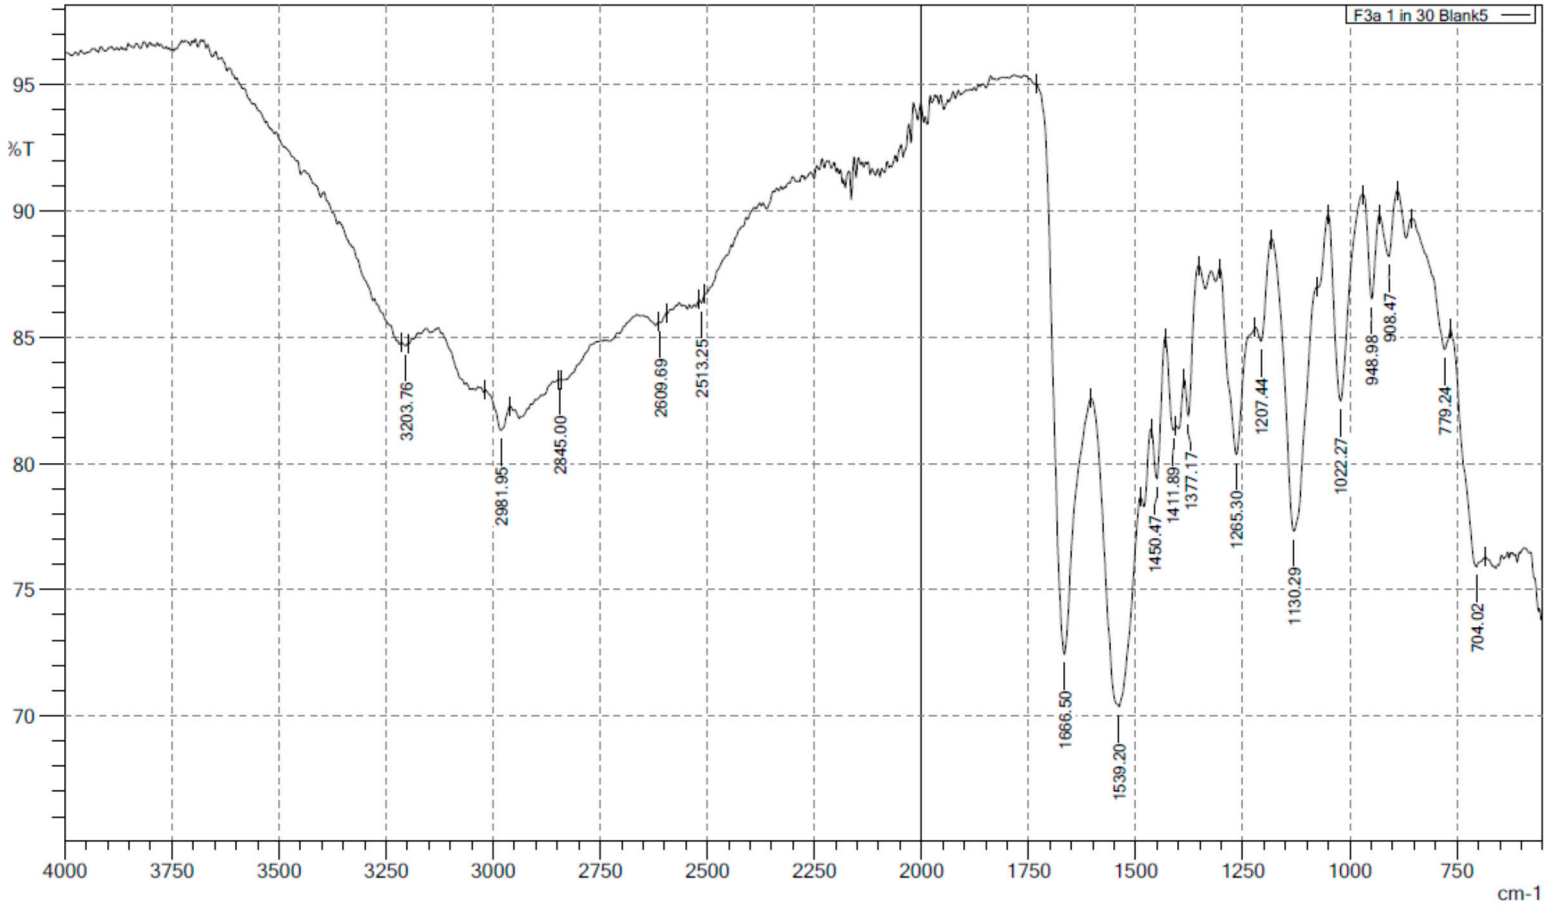

SM: 7G

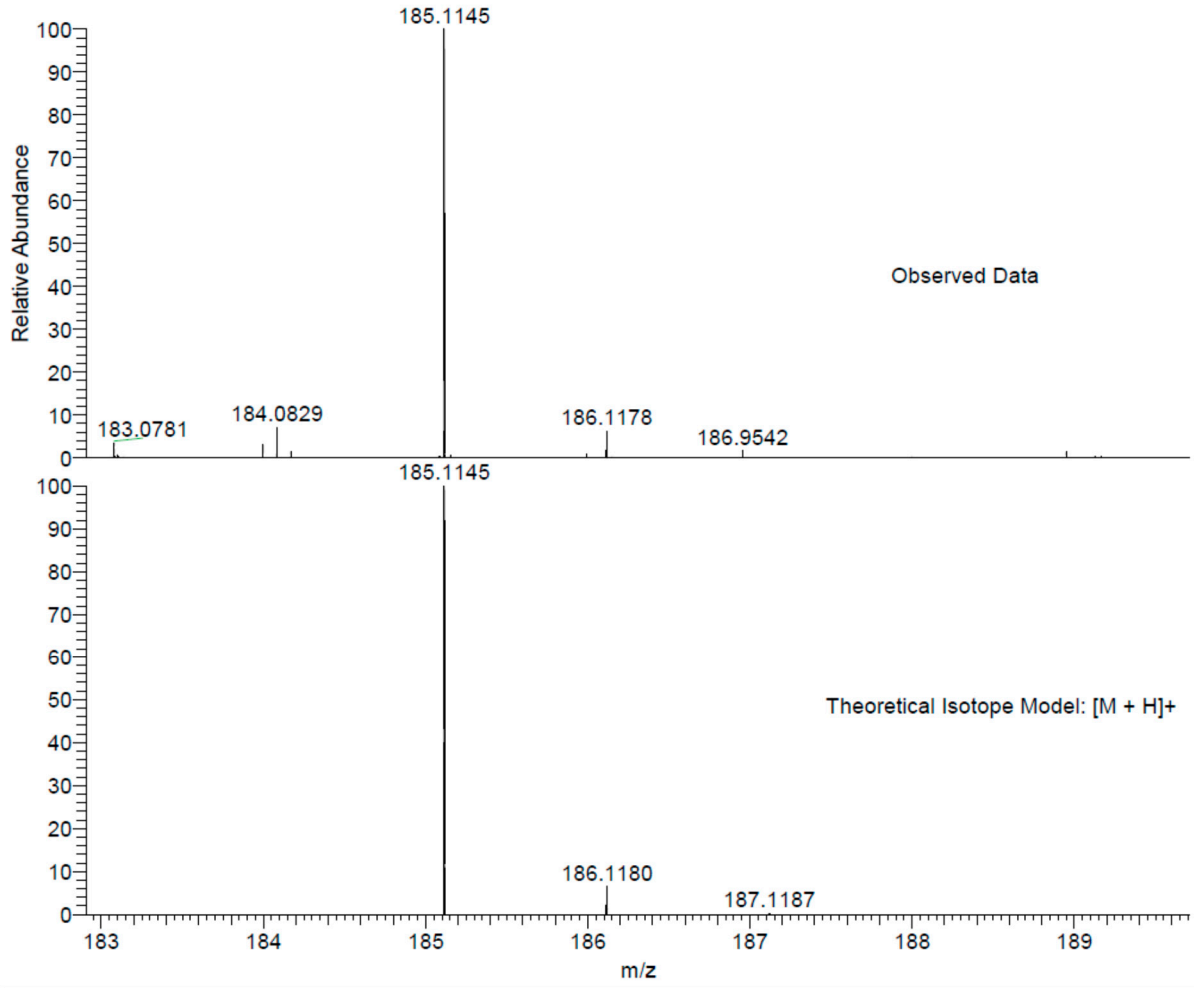

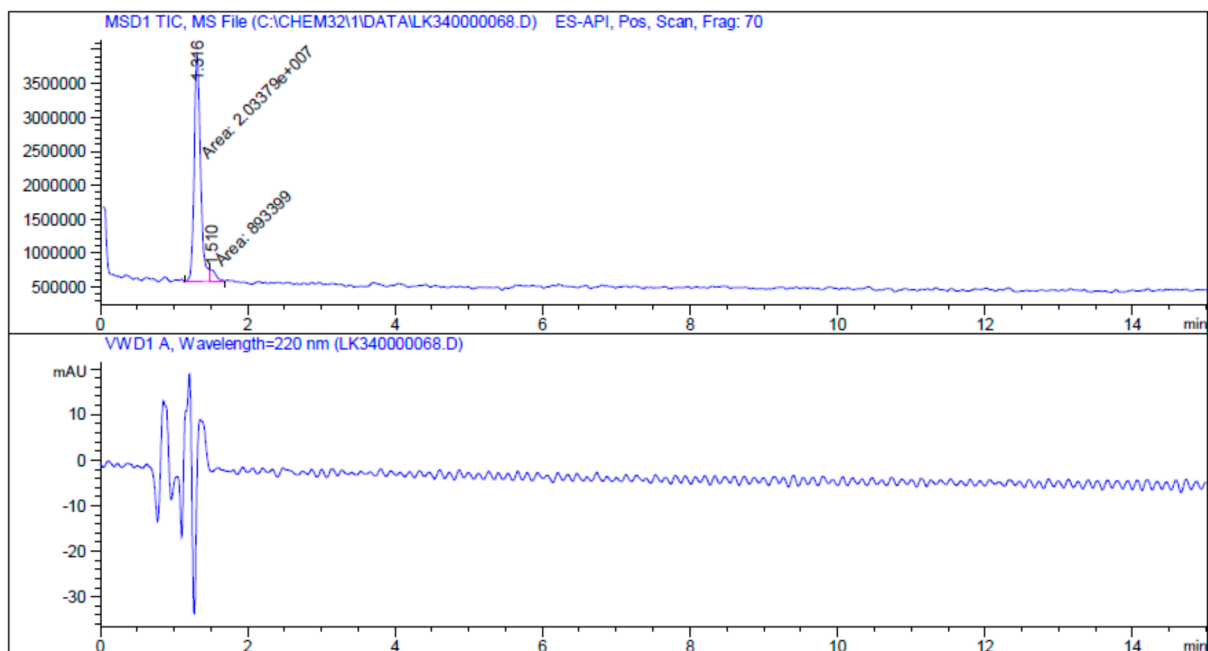

=====  
 Area Percent Report  
 =====

Sorted By : Signal  
 Multiplier: : 1.0000  
 Dilution: : 1.0000  
 Use Multiplier & Dilution Factor with ISTDs

Signal 1: MSD1 TIC, MS File

| Peak # | RetTime [min] | Type | Width [min] | Area      | Height    | Area %  |
|--------|---------------|------|-------------|-----------|-----------|---------|
| 1      | 1.316         | MF   | 0.0976      | 2.03379e7 | 3.47199e6 | 95.7921 |
| 2      | 1.510         | FM   | 0.0882      | 8.93399e5 | 1.68763e5 | 4.2079  |

Totals : 2.12313e7 3.64076e6

(S)-Benzyl-(3-((1-(1H-tetrazol-5-yl)ethyl)amino)-3-oxopropyl)carbamate **13d-L**:

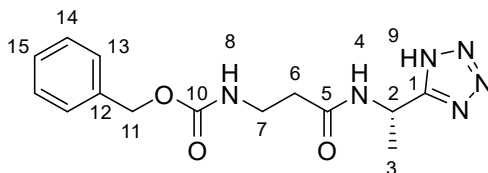

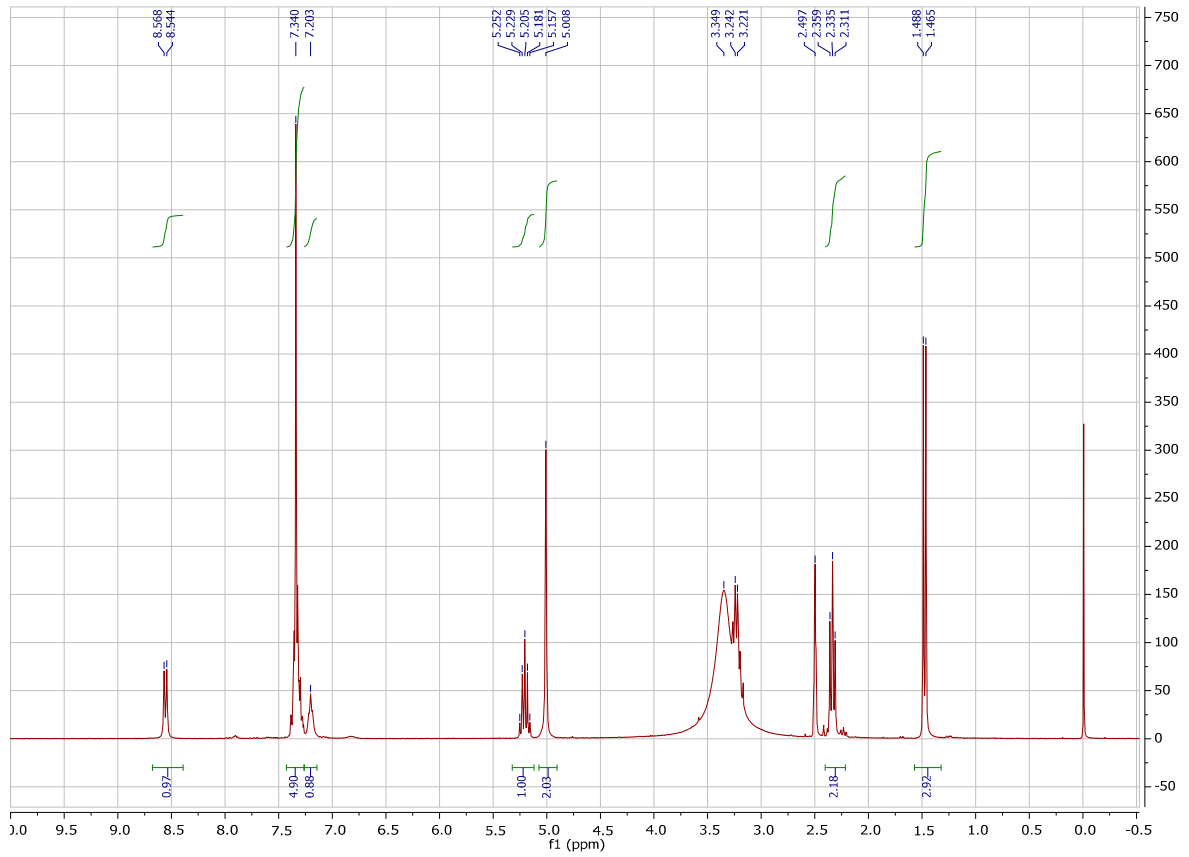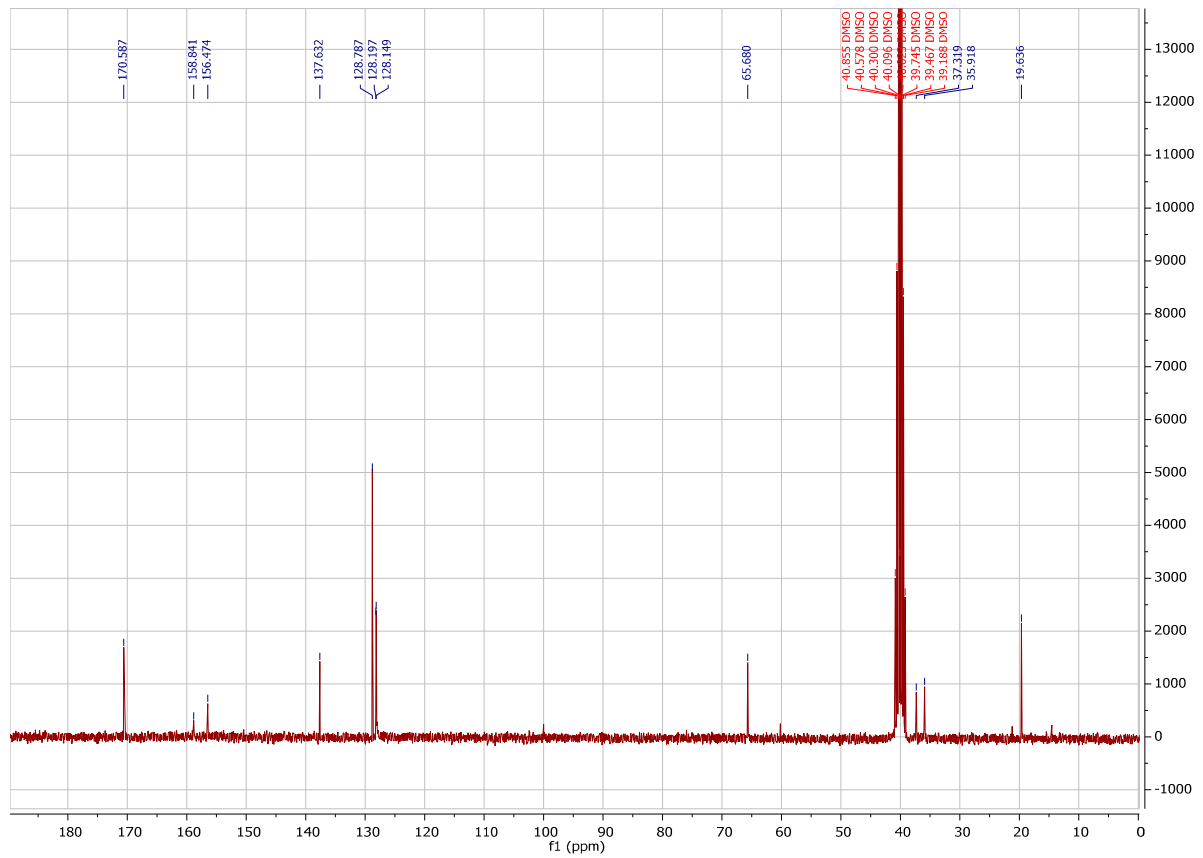

SM: 7G

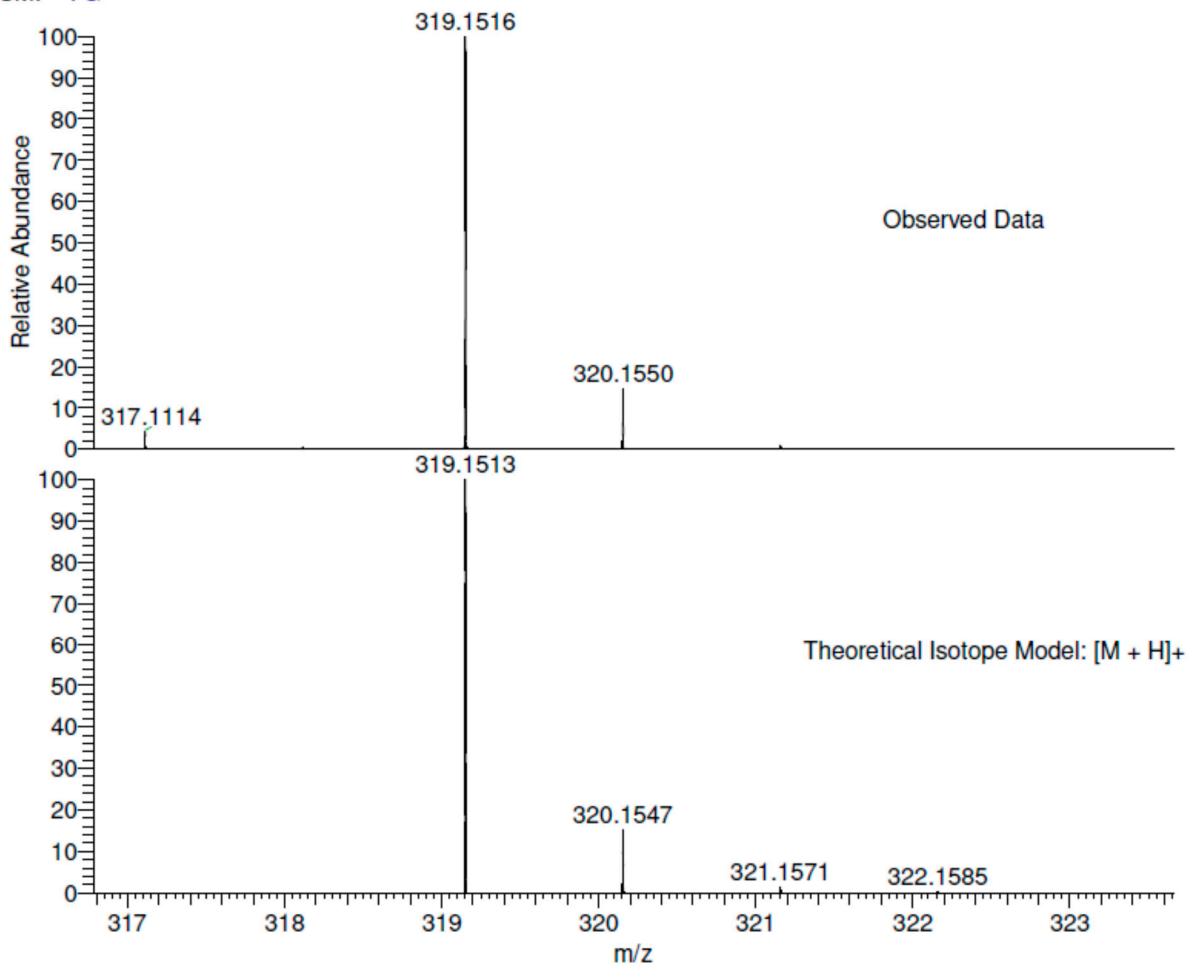



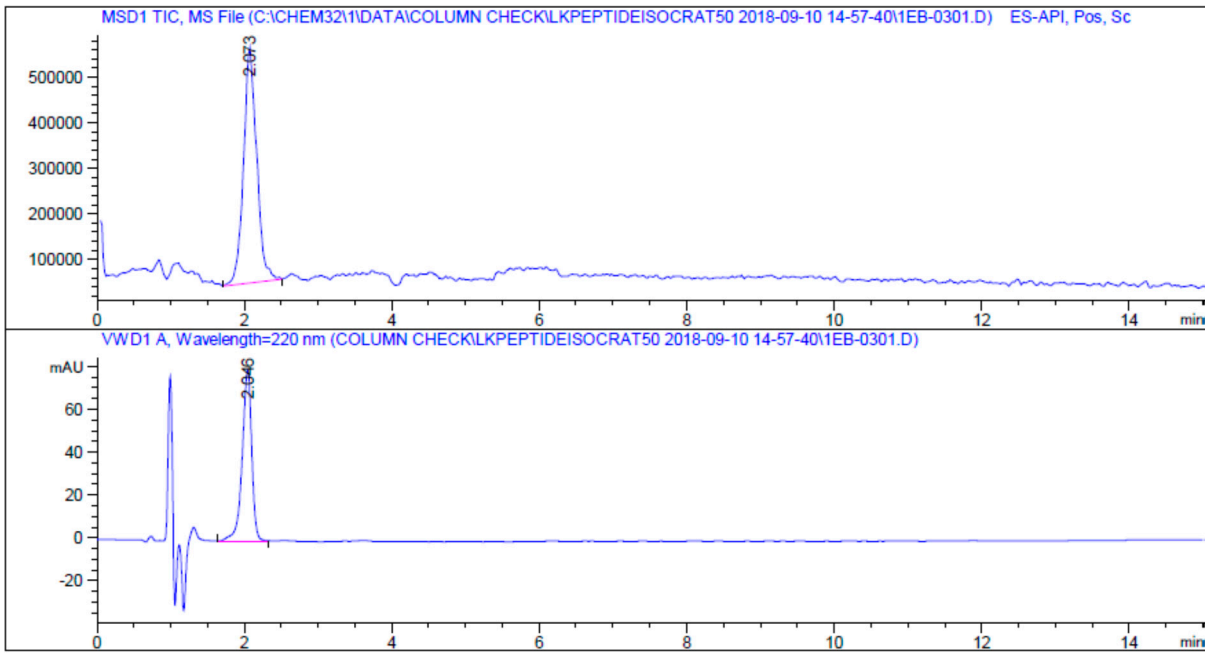

=====  
 Area Percent Report  
 =====

Sorted By : Signal  
 Multiplier: : 1.0000  
 Dilution: : 1.0000  
 Use Multiplier & Dilution Factor with ISTDs

Signal 1: MSD1 TIC, MS File

| Peak # | RetTime [min] | Type | Width [min] | Area      | Height    | Area %   |
|--------|---------------|------|-------------|-----------|-----------|----------|
| 1      | 2.073         | BB   | 0.1717      | 6.38522e6 | 5.16189e5 | 100.0000 |

Totals :                    6.38522e6  5.16189e5

3-Amino-N-[(1S)-1-(1H-1,2,3,4-tetrazol-5-yl)ethyl]propanamide **14d-L**:

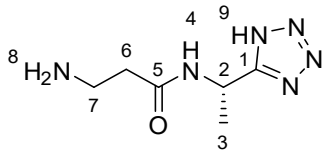

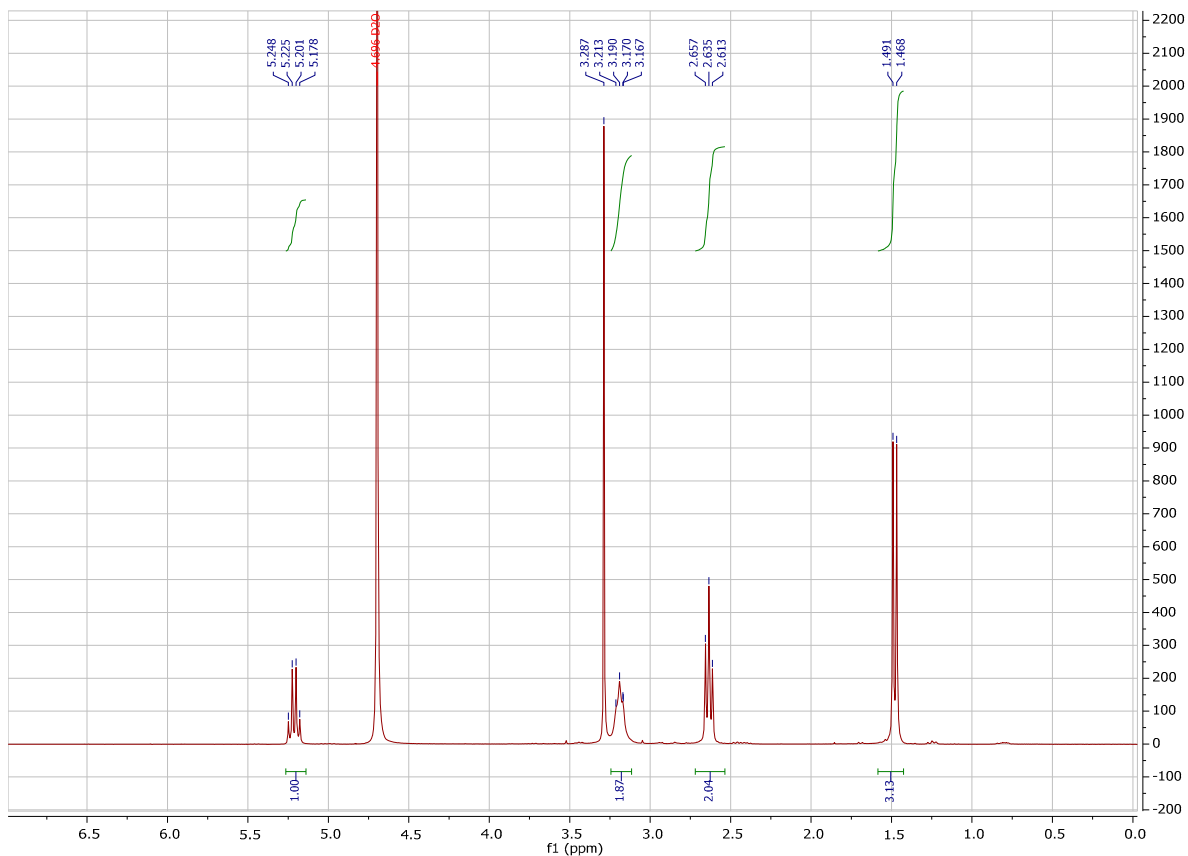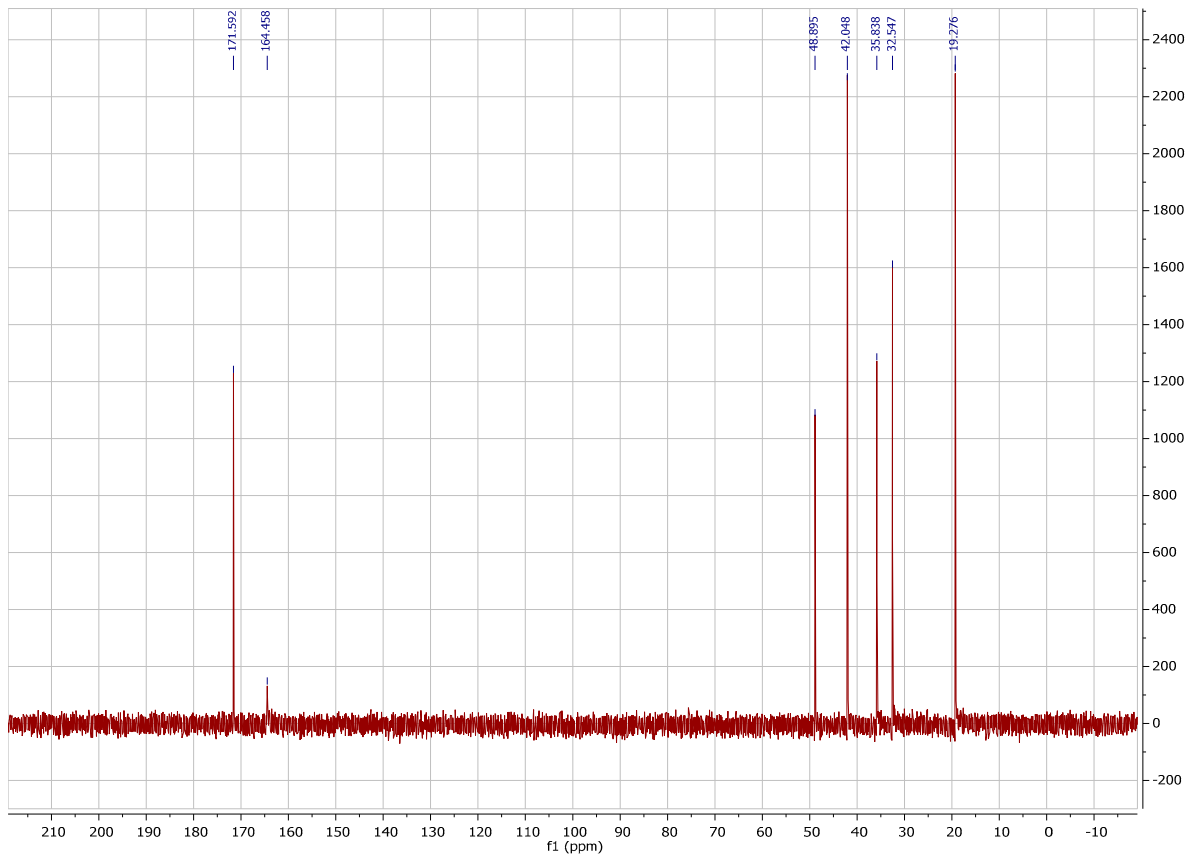

SM: 7G

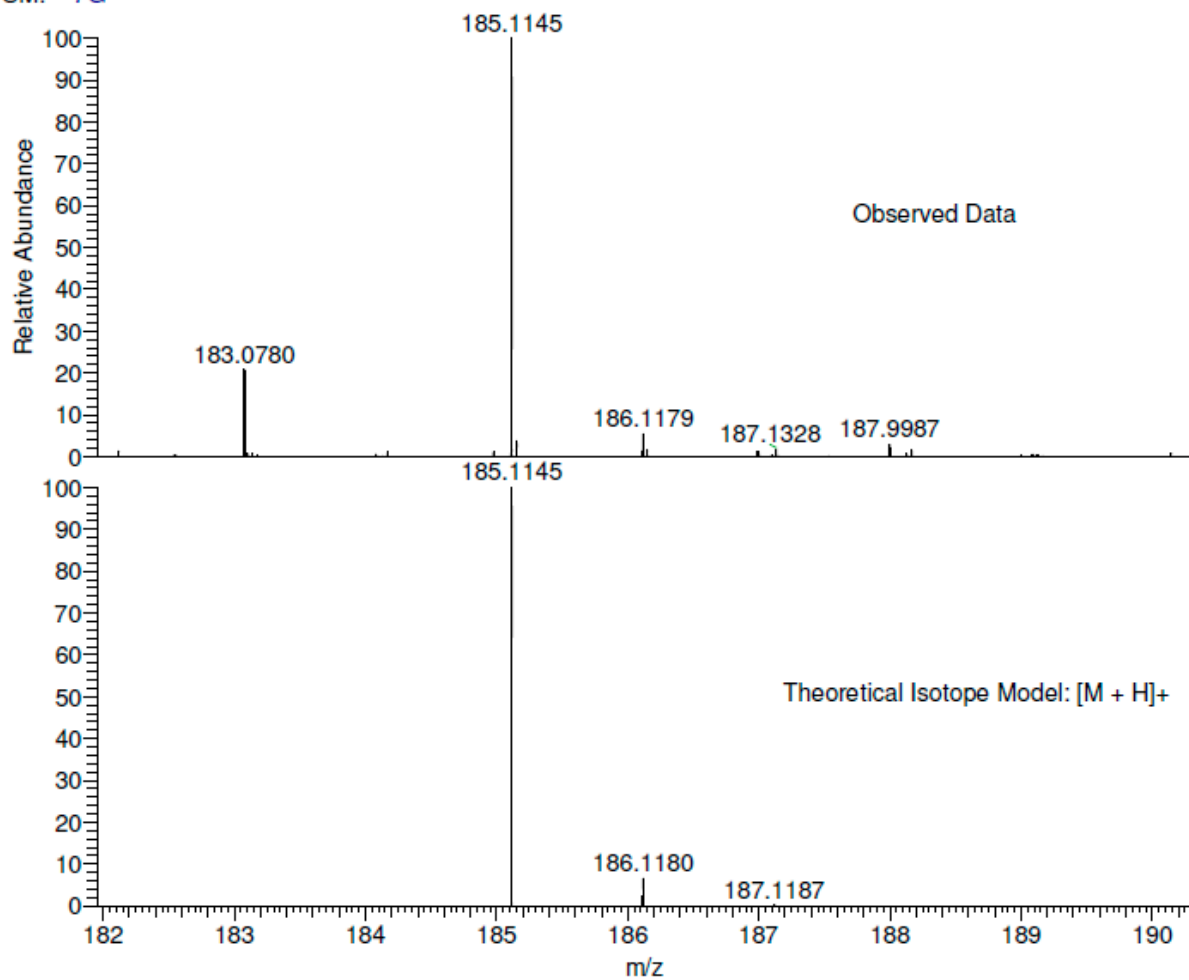

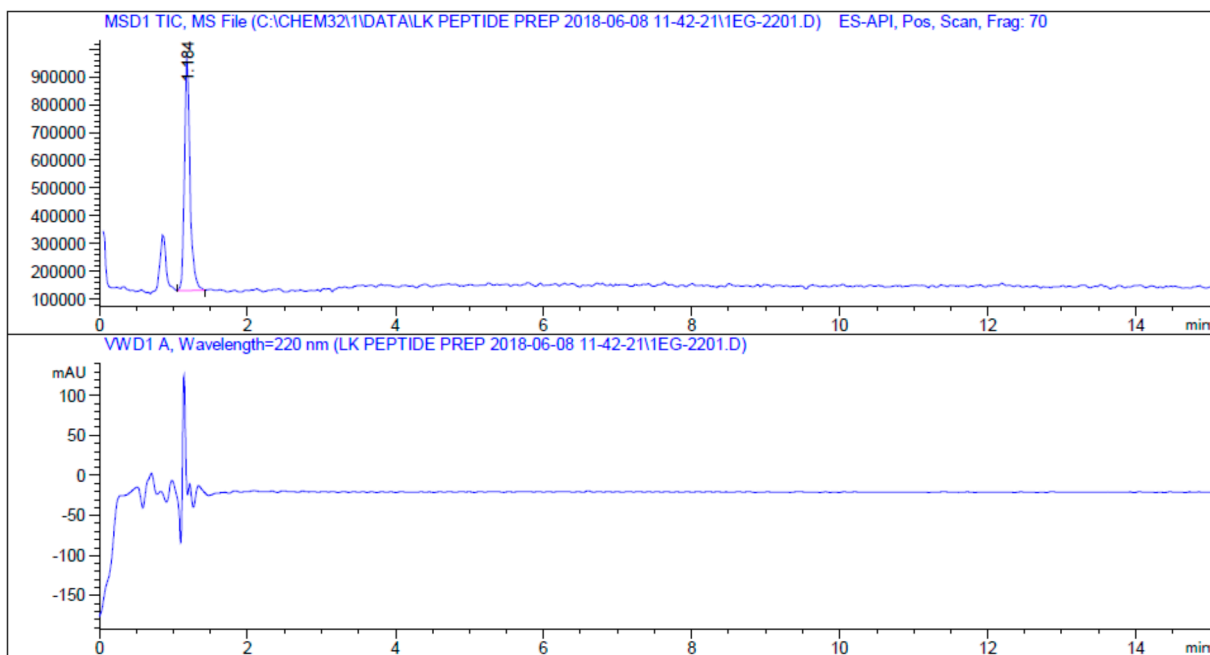

=====  
 Area Percent Report  
 =====

Sorted By : Signal  
 Multiplier: : 1.0000  
 Dilution: : 1.0000  
 Use Multiplier & Dilution Factor with ISTDs

Signal 1: MSD1 TIC, MS File

| Peak # | RetTime [min] | Type | Width [min] | Area      | Height    | Area %   |
|--------|---------------|------|-------------|-----------|-----------|----------|
| 1      | 1.184         | BB   | 0.0759      | 4.37722e6 | 8.57835e5 | 100.0000 |

Totals :                                    4.37722e6  8.57835e5

Benzyl-*N*-[(1*S*)-1-[(1*S*)-1-(1*H*-1,2,3,4-tetrazol-5-yl)ethyl]carbamoyl]butyl]carbamate **13e-LL**:

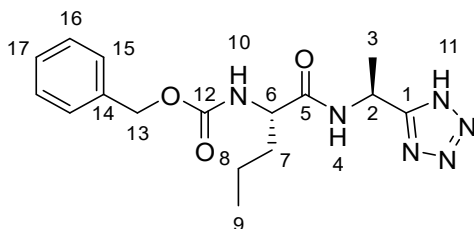

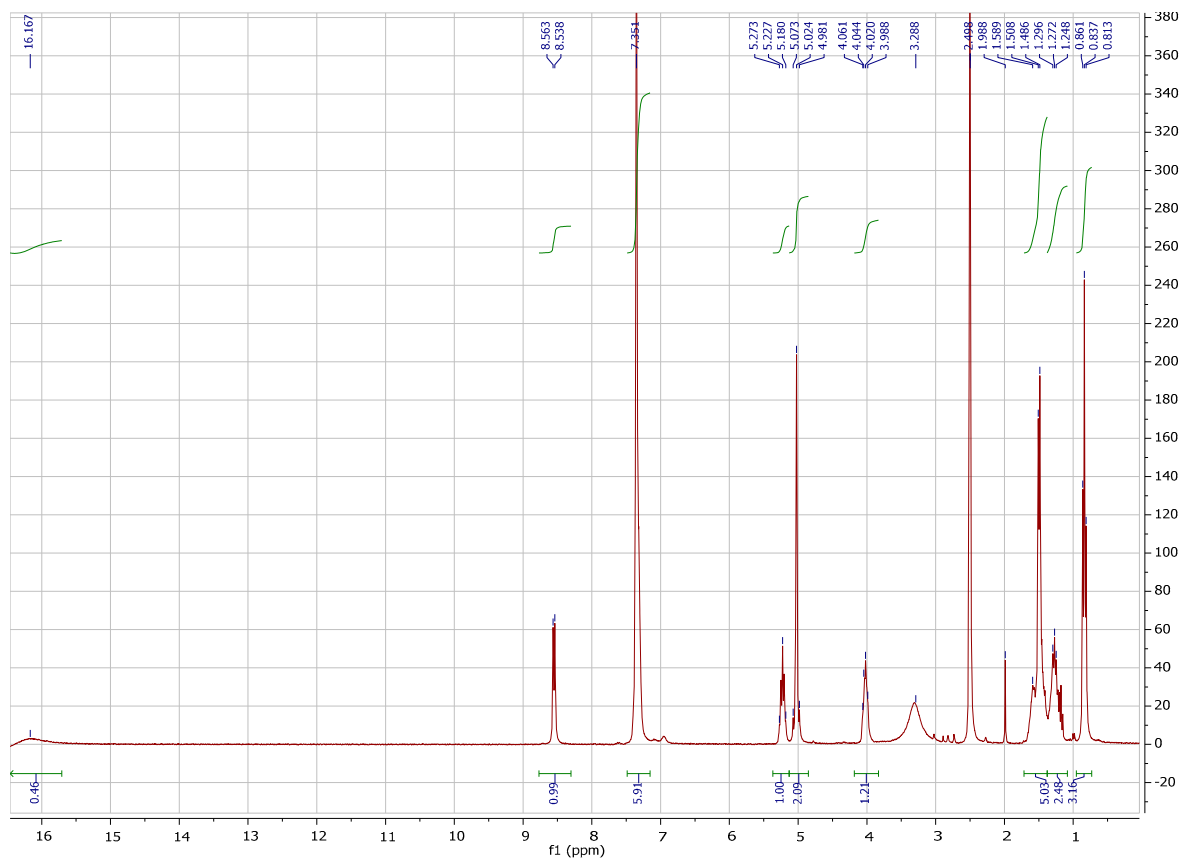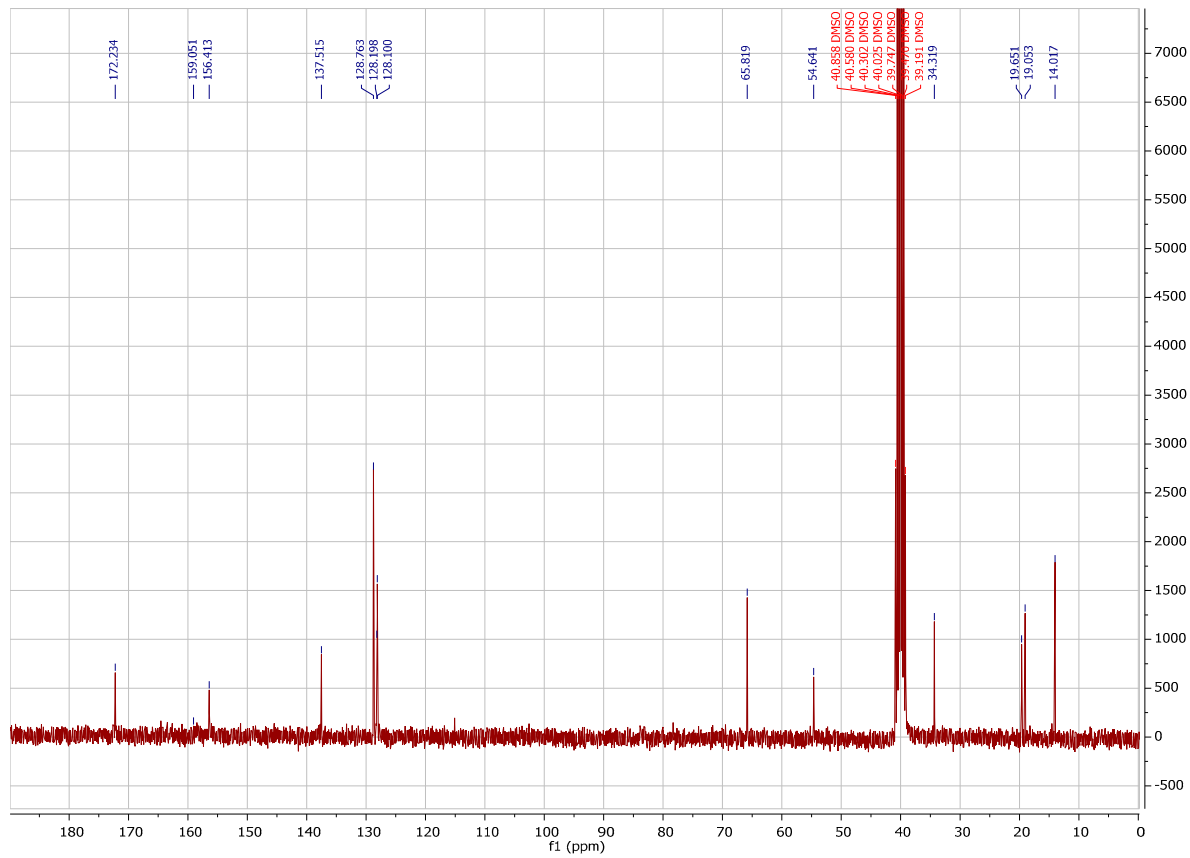

SM: 7G

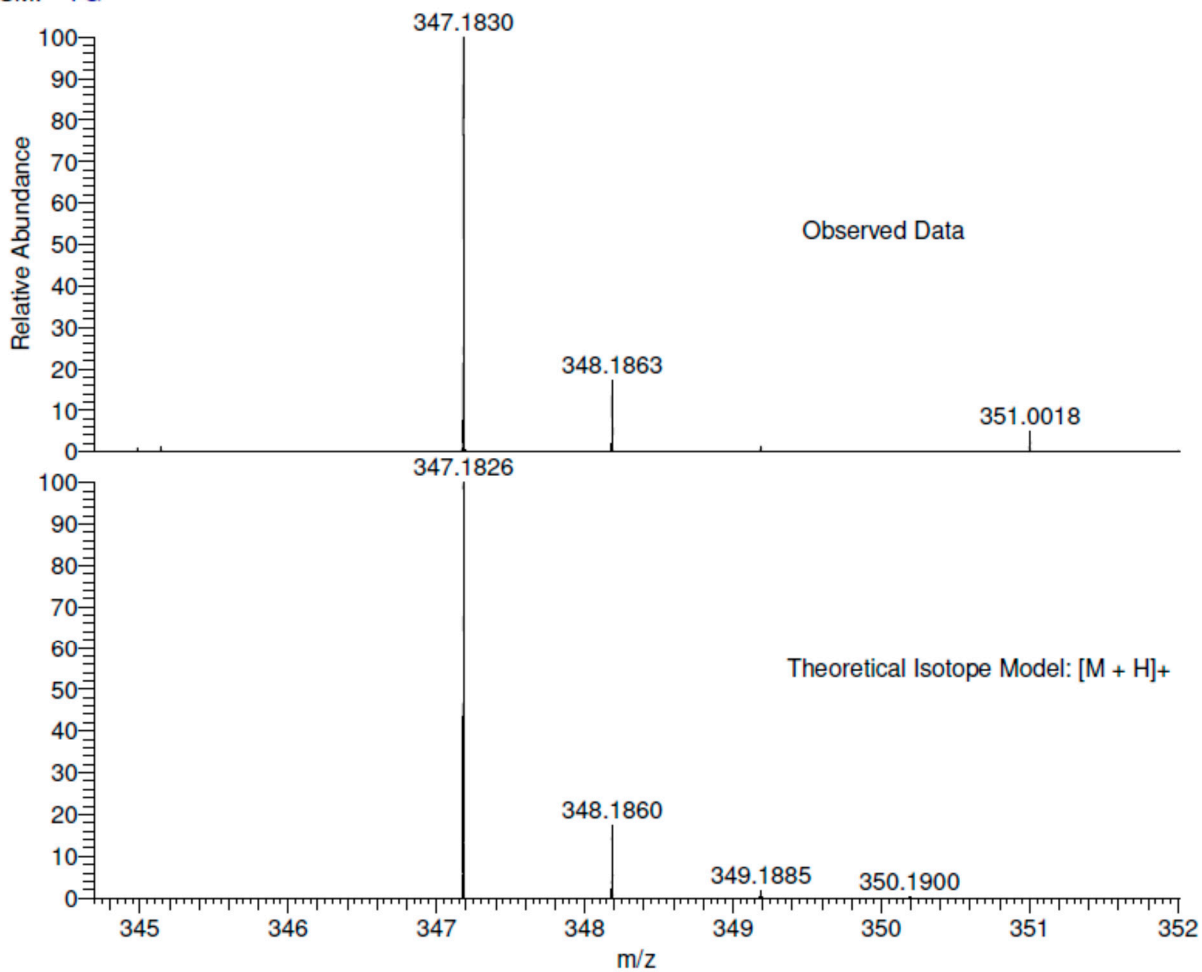

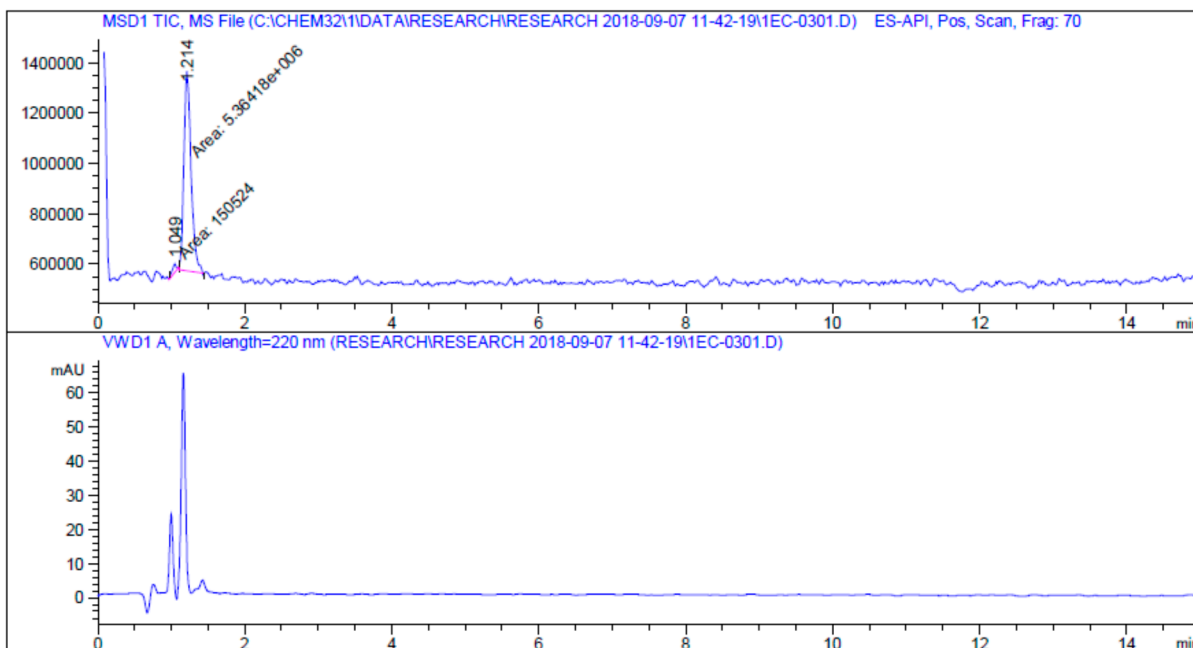

=====  
 Area Percent Report  
 =====

Sorted By : Signal  
 Multiplier: : 1.0000  
 Dilution: : 1.0000  
 Use Multiplier & Dilution Factor with ISTDs

Signal 1: MSD1 TIC, MS File

| Peak # | RetTime [min] | Type | Width [min] | Area      | Height    | Area %  |
|--------|---------------|------|-------------|-----------|-----------|---------|
| 1      | 1.049         | MM   | 0.0621      | 1.50524e5 | 4.04039e4 | 2.7295  |
| 2      | 1.214         | MM   | 0.1118      | 5.36418e6 | 7.99972e5 | 97.2705 |

Totals : 5.51471e6 8.40376e5

(S)-N-((S)-1-(1H-tetrazol-5-yl)ethyl)-2-aminopentanamide **14e-LL**:

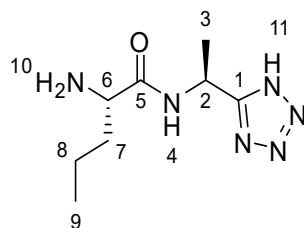

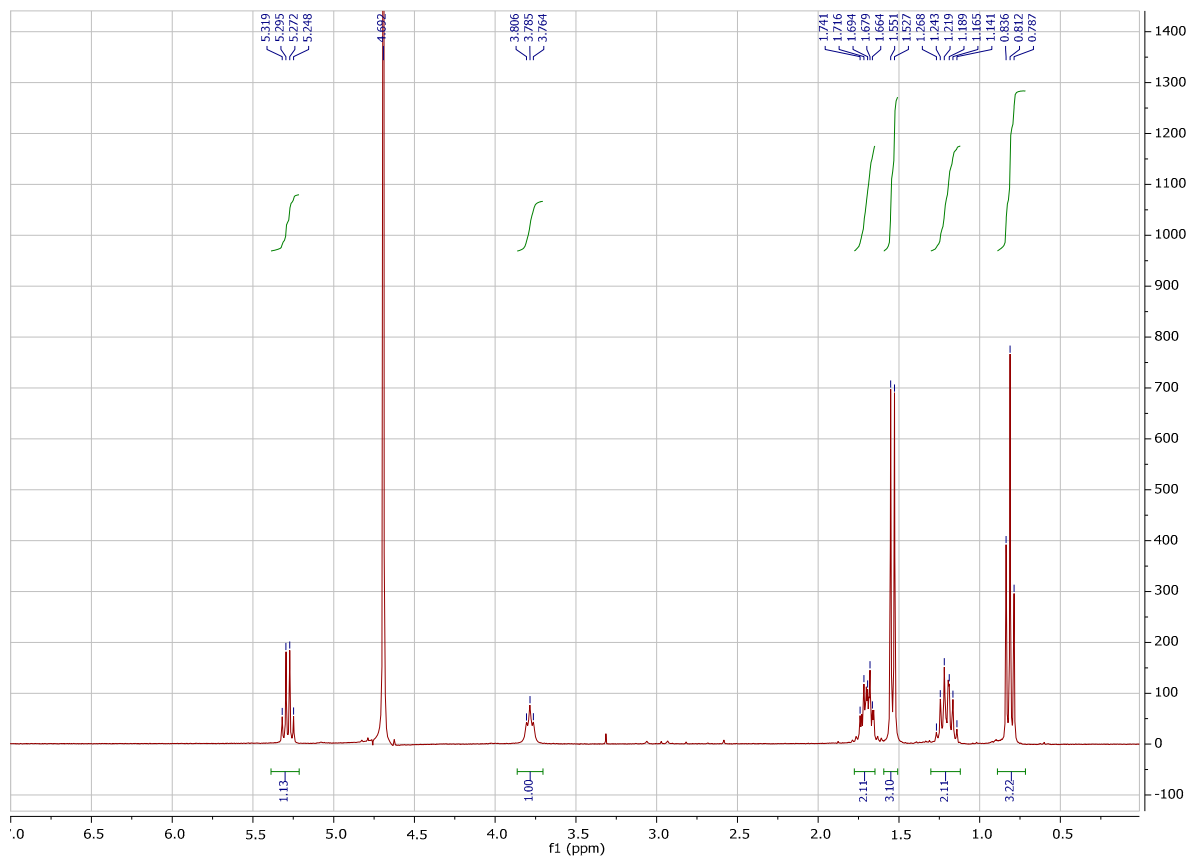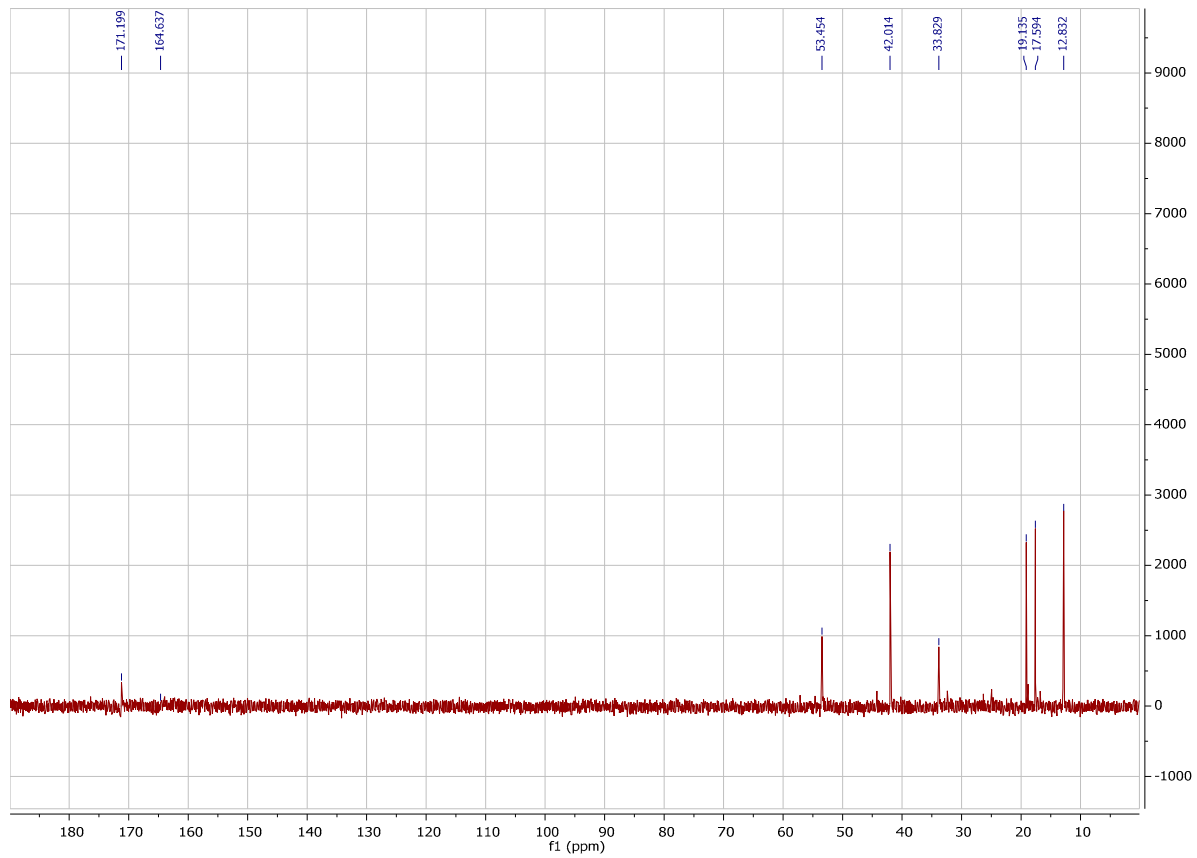



SM: 7G

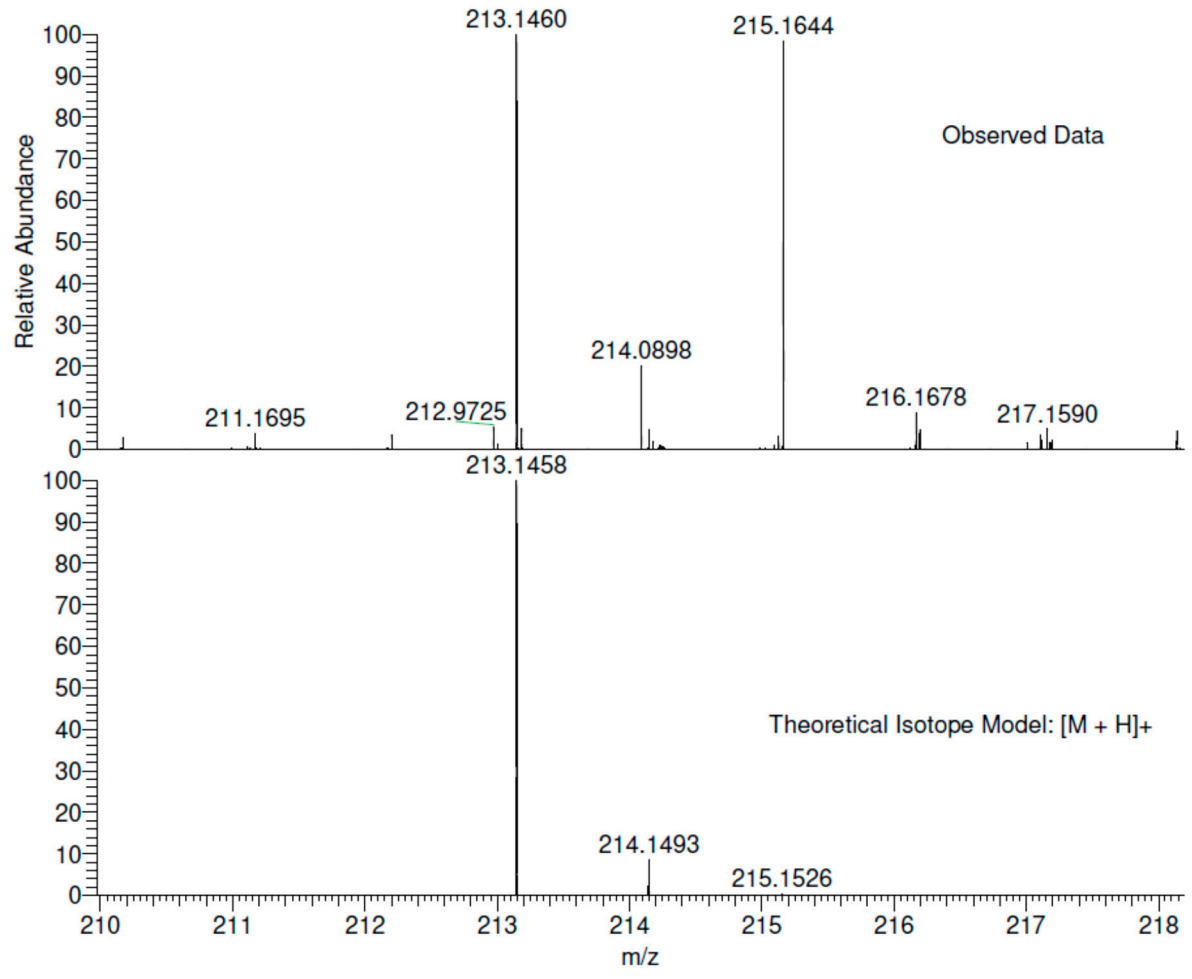

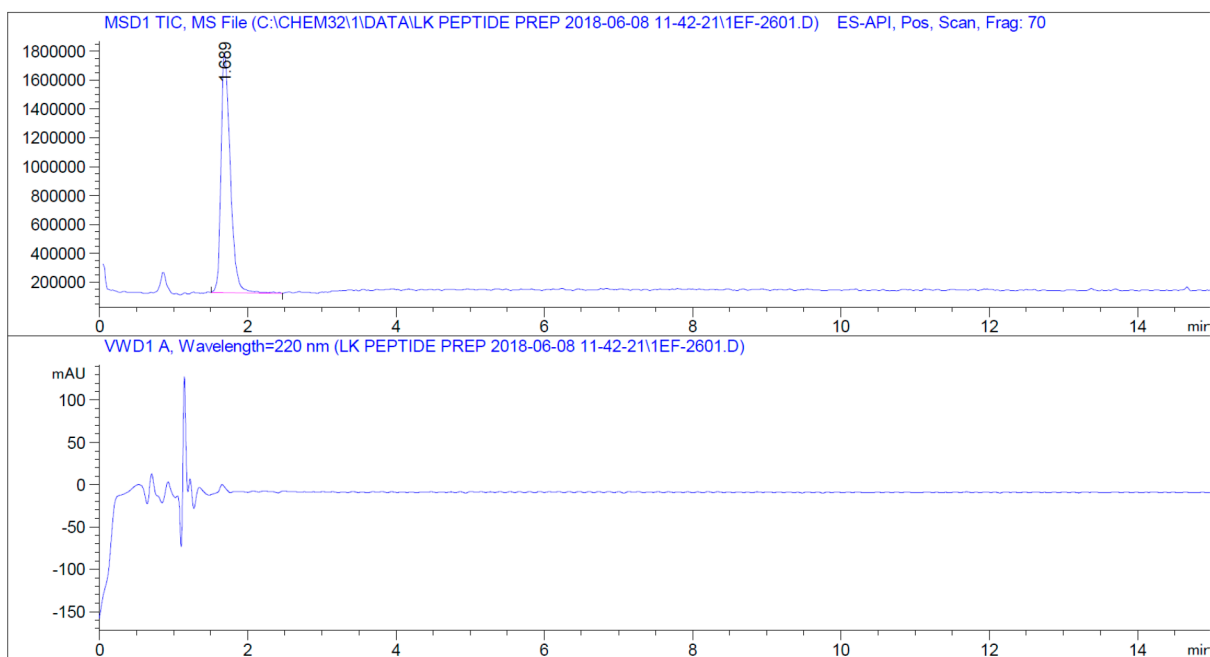

=====  
 Area Percent Report  
 =====

Sorted By : Signal  
 Multiplier: : 1.0000  
 Dilution: : 1.0000  
 Use Multiplier & Dilution Factor with ISTDs

Signal 1: MSD1 TIC, MS File

| Peak # | RetTime [min] | Type | Width [min] | Area      | Height    | Area %   |
|--------|---------------|------|-------------|-----------|-----------|----------|
| 1      | 1.689         | BB   | 0.1337      | 1.43625e7 | 1.66034e6 | 100.0000 |

Totals : 1.43625e7 1.66034e6

Benzyl-*N*-[(1*S*)-3-methyl-1-[(1*S*)-1-(1*H*-1,2,3,4-tetrazol-5-yl)ethyl]carbamoyl]butyl]carbamate **13h-LL**:

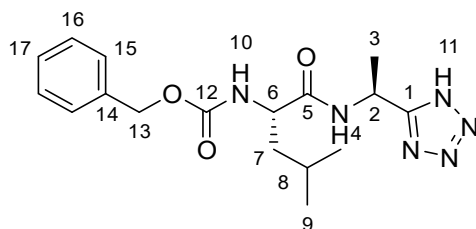

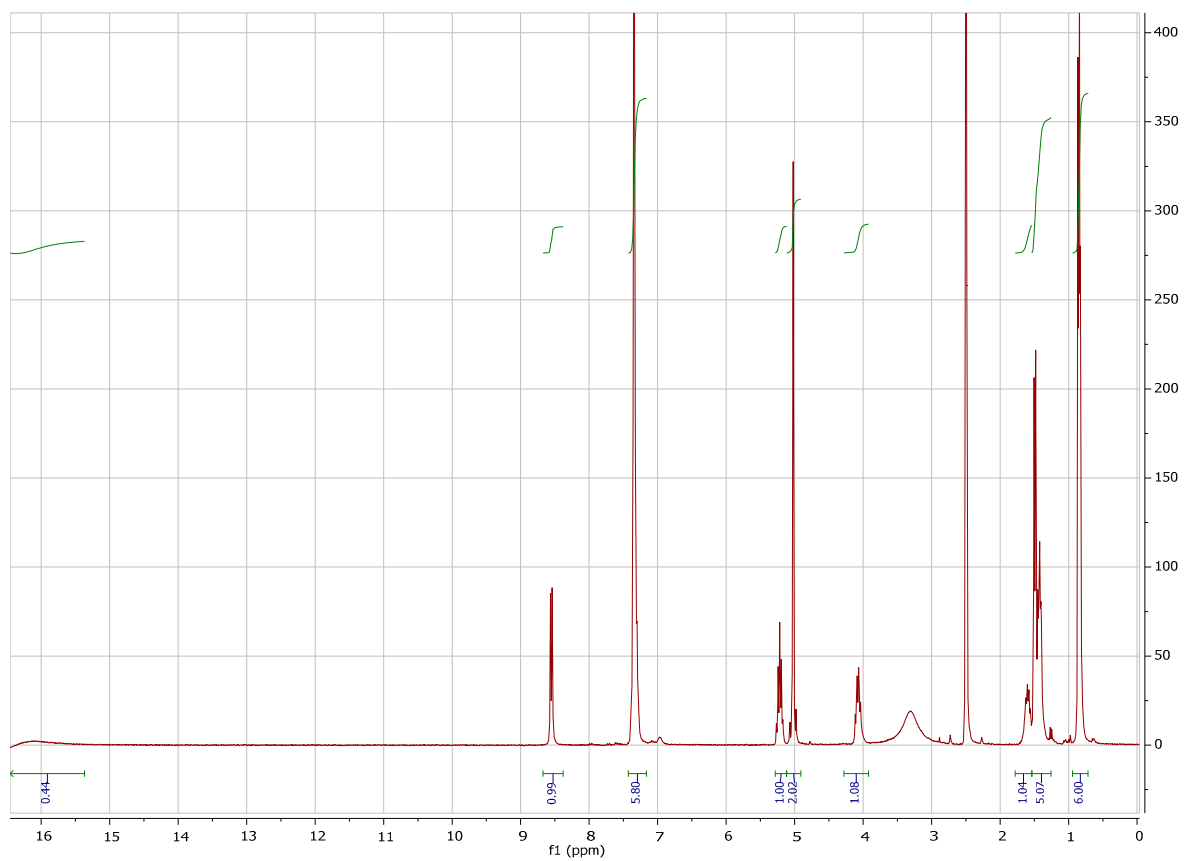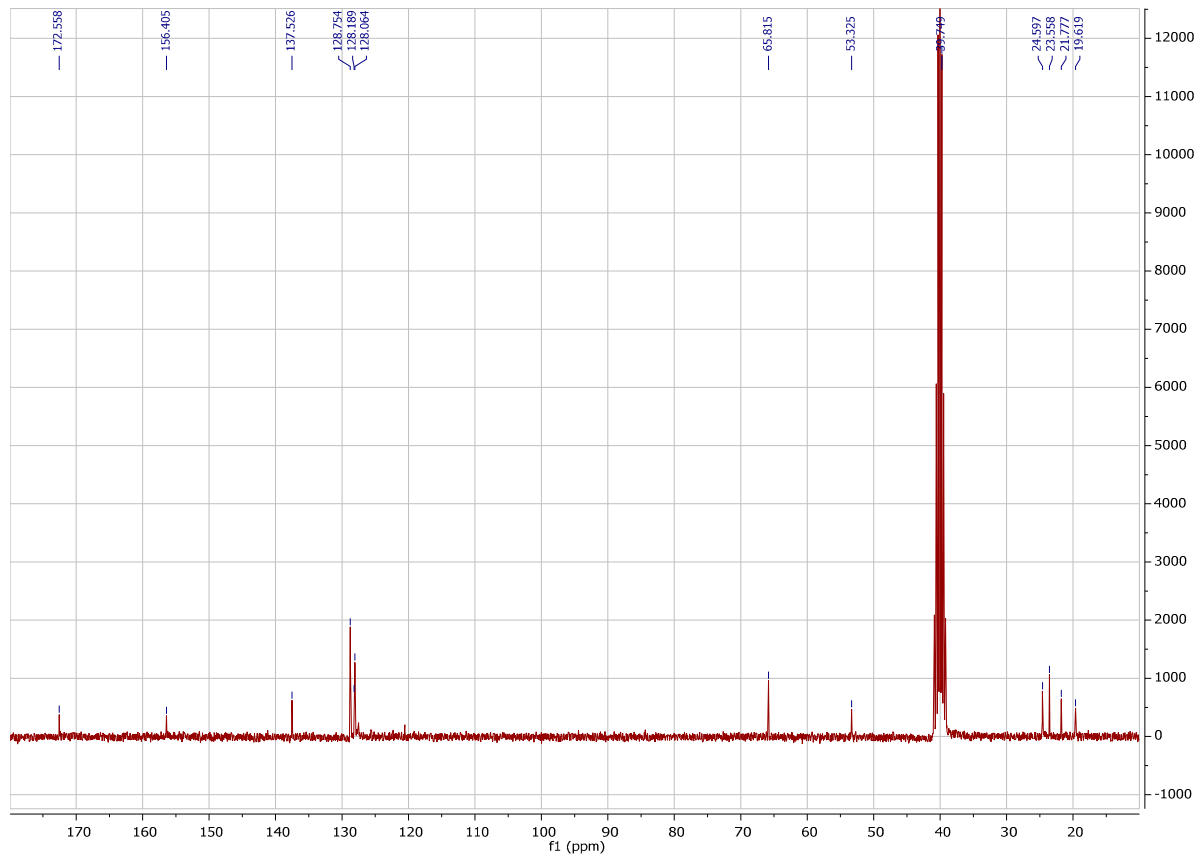

(2*S*)-2-Amino-4-methyl-*N*-[(1*S*)-1-(1*H*-1,2,3,4-tetrazol-5-yl)ethyl]pentanamide **14h-LL**:

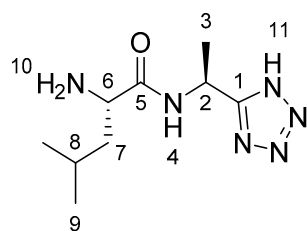

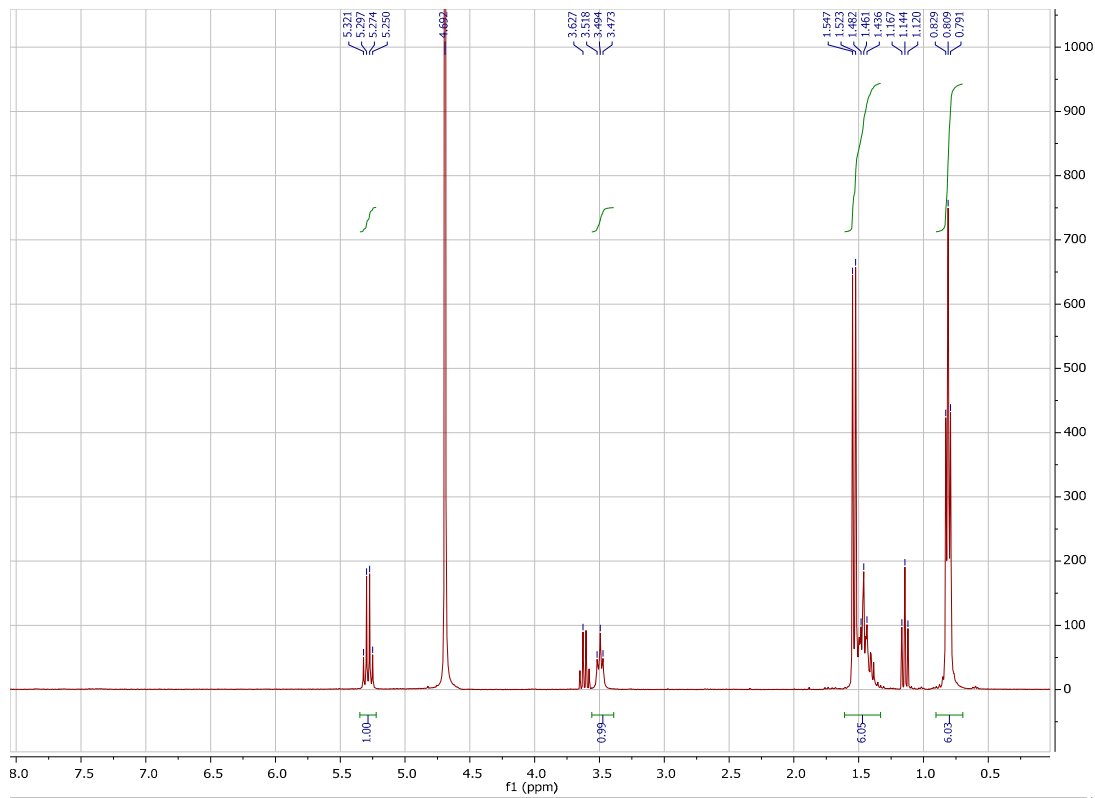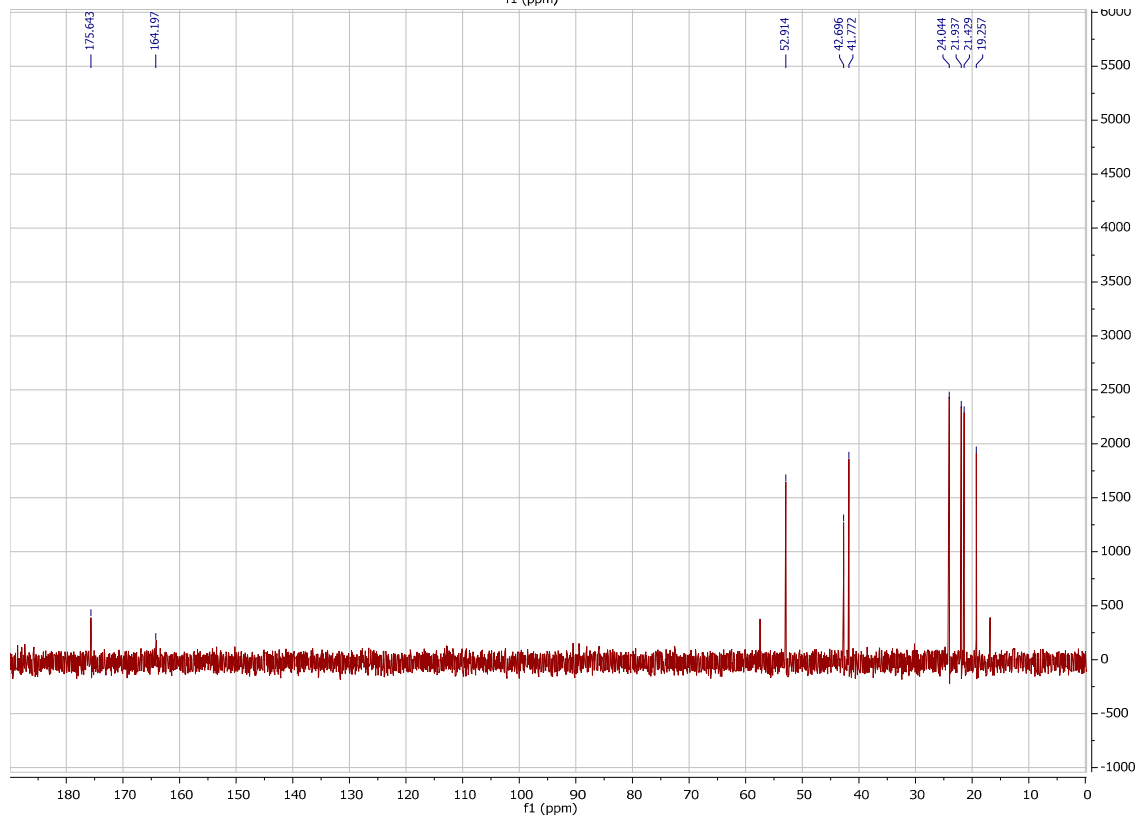

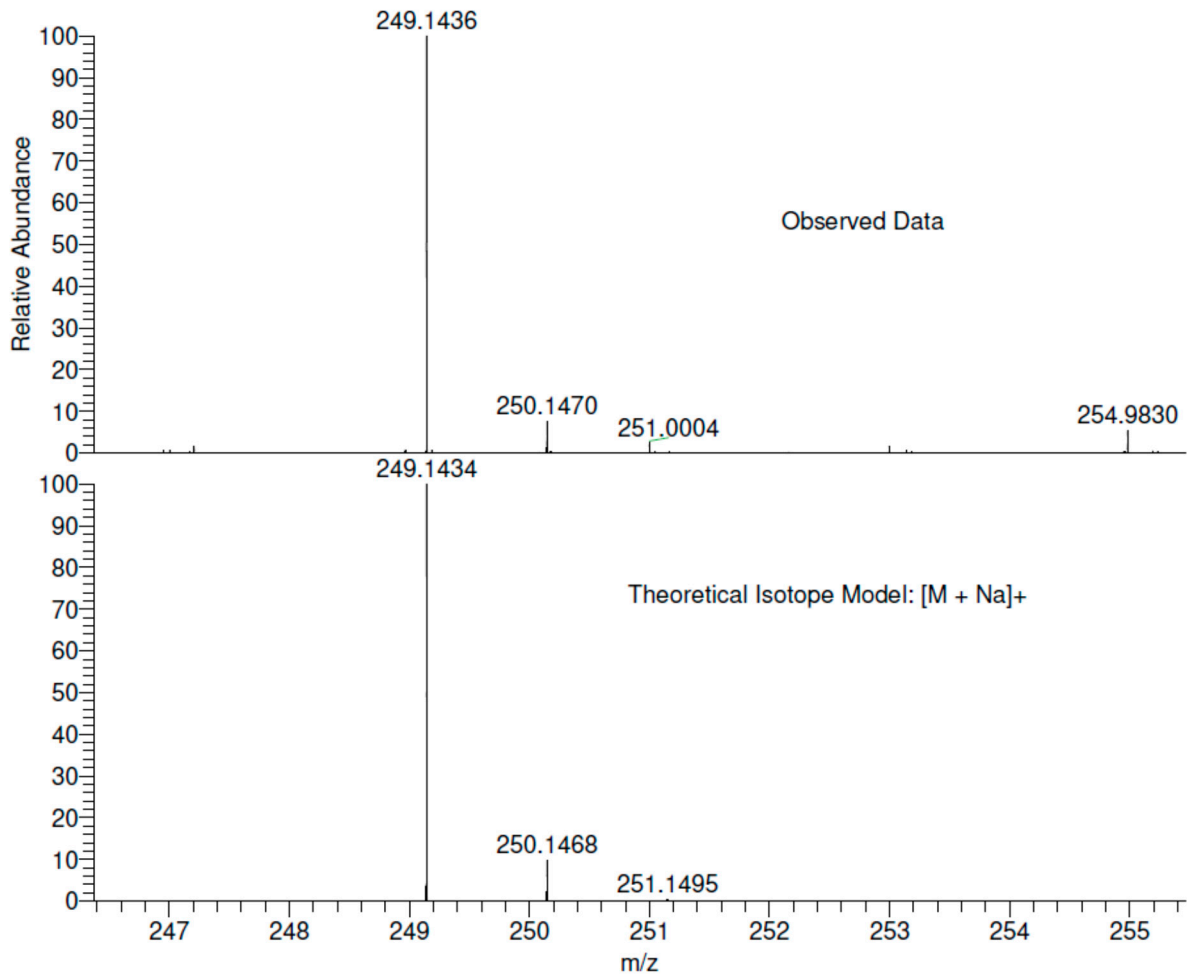

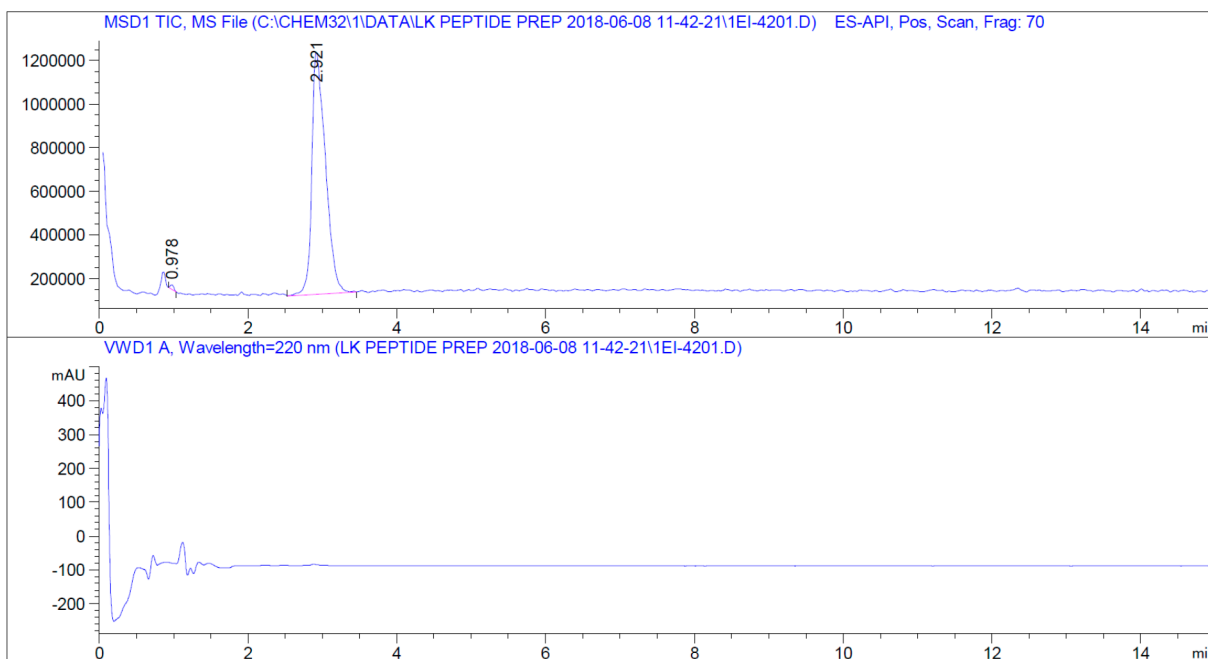

=====  
 Area Percent Report  
 =====

Sorted By : Signal  
 Multiplier: : 1.0000  
 Dilution: : 1.0000  
 Use Multiplier & Dilution Factor with ISTDs

Signal 1: MSD1 TIC, MS File

| Peak # | RetTime [min] | Type | Width [min] | Area      | Height    | Area %  |
|--------|---------------|------|-------------|-----------|-----------|---------|
| 1      | 0.978         | BB   | 0.0522      | 6.68819e4 | 2.18223e4 | 0.4687  |
| 2      | 2.921         | BB   | 0.1758      | 1.42027e7 | 1.11638e6 | 99.5313 |

Totals : 1.42696e7 1.13821e6

Benzyl-N-[(1S)-3-methyl-1-[(1R)-1-(1H-1,2,3,4-tetrazol-5-yl)ethyl]carbamoyl]butyl]carbamate **13h-LD**:

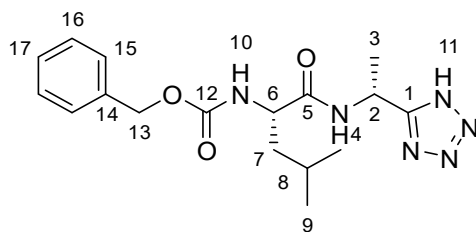

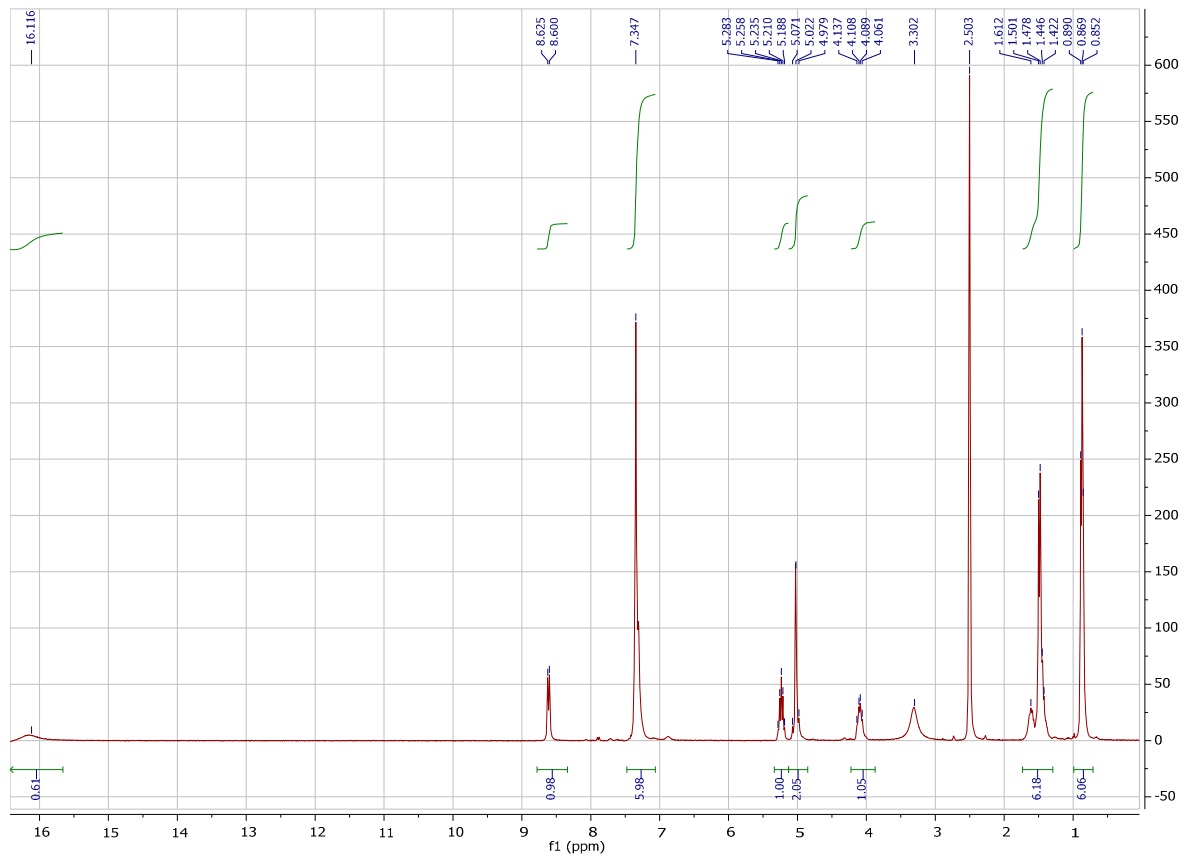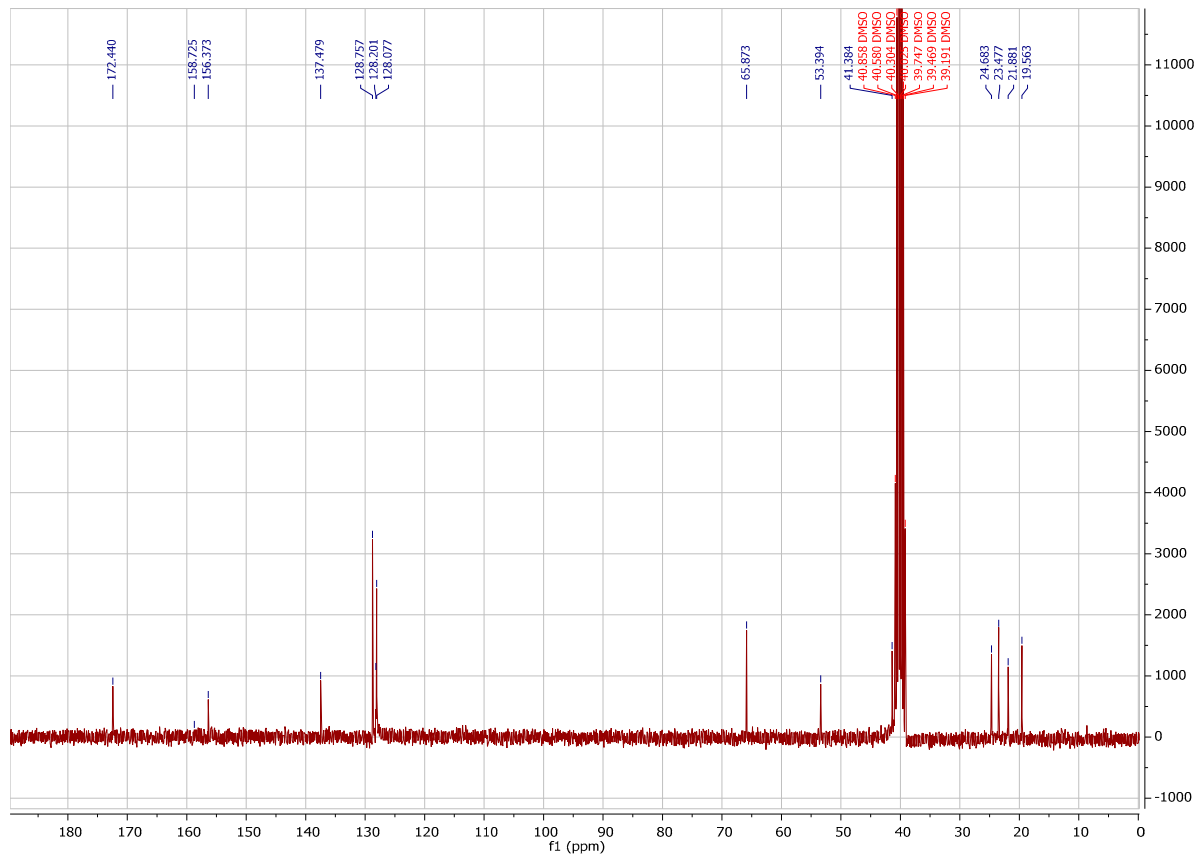



SM: 7G

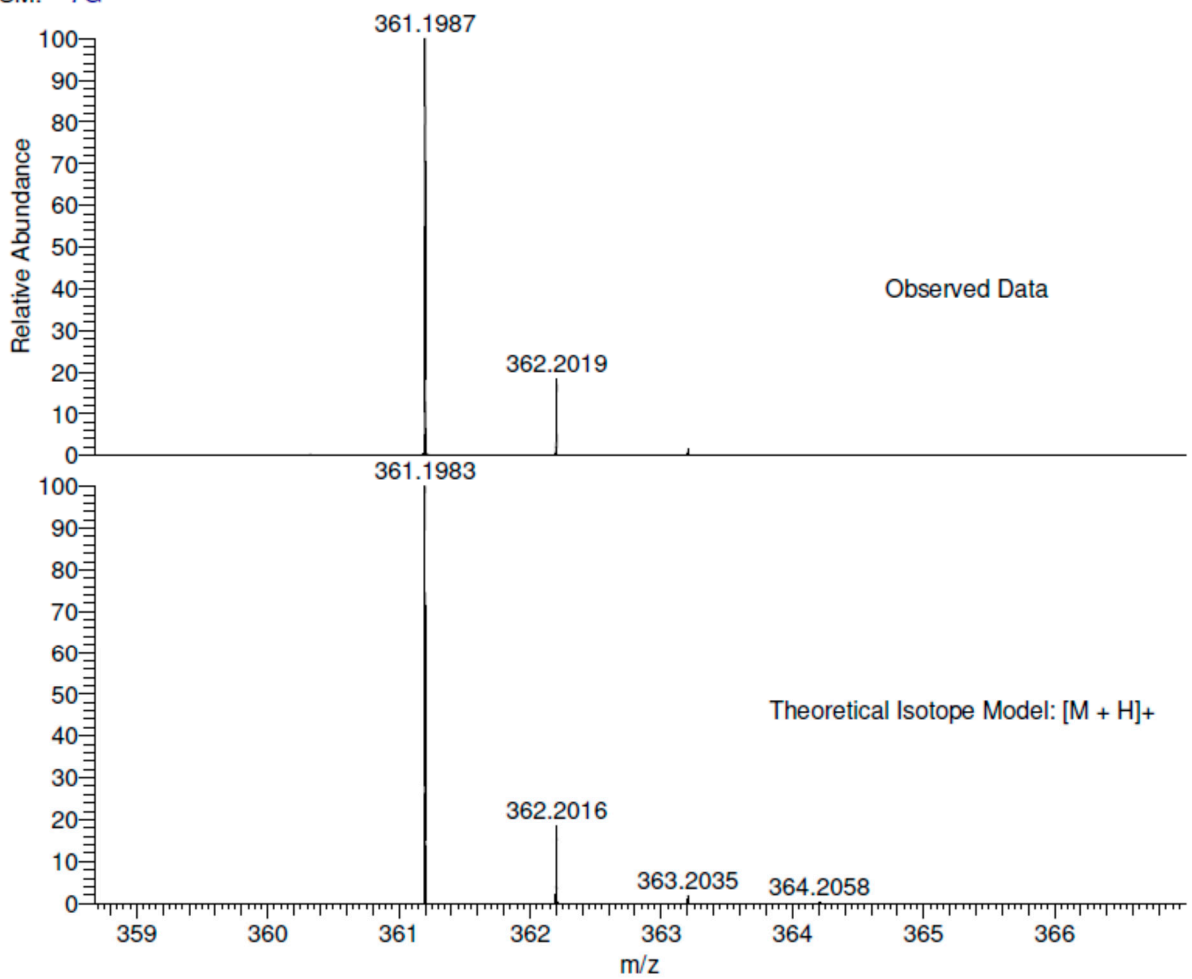

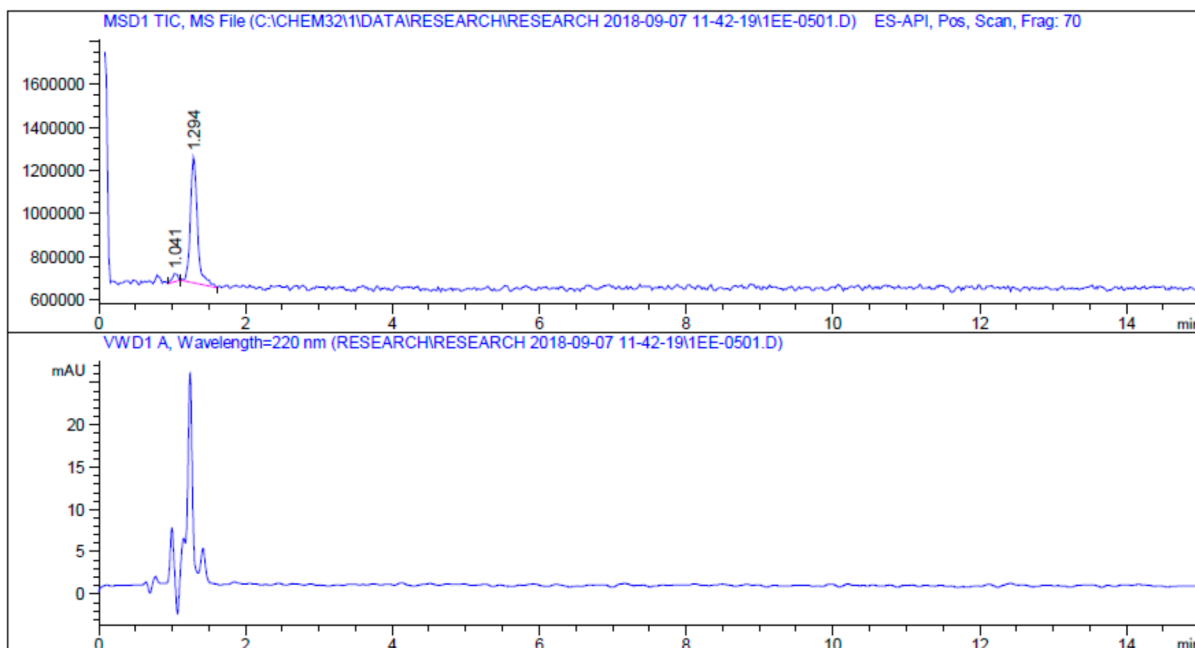

=====  
 Area Percent Report  
 =====

Sorted By : Signal  
 Multiplier: : 1.0000  
 Dilution: : 1.0000  
 Use Multiplier & Dilution Factor with ISTDs

Signal 1: MSD1 TIC, MS File

| Peak # | RetTime [min] | Type | Width [min] | Area      | Height    | Area %  |
|--------|---------------|------|-------------|-----------|-----------|---------|
| 1      | 1.041         | BB   | 0.0982      | 1.84721e5 | 3.75385e4 | 4.5083  |
| 2      | 1.294         | BB   | 0.0992      | 3.91267e6 | 5.89957e5 | 95.4917 |

Totals :                                    4.09739e6   6.27495e5

(2S)-2-Amino-4-methyl-N-[(1R)-1-(1H-1,2,3,4-tetrazol-5-yl)ethyl]pentanamide **14h-LD**:

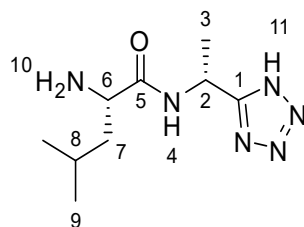

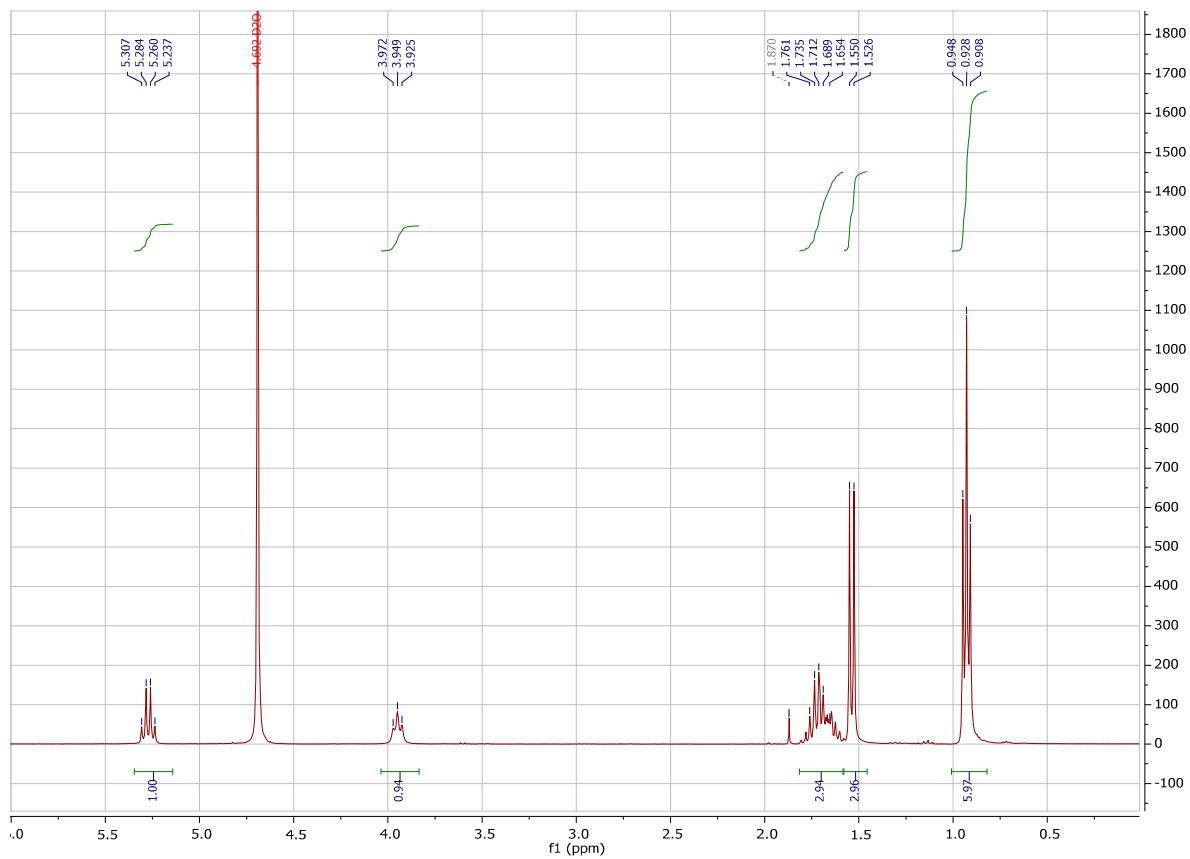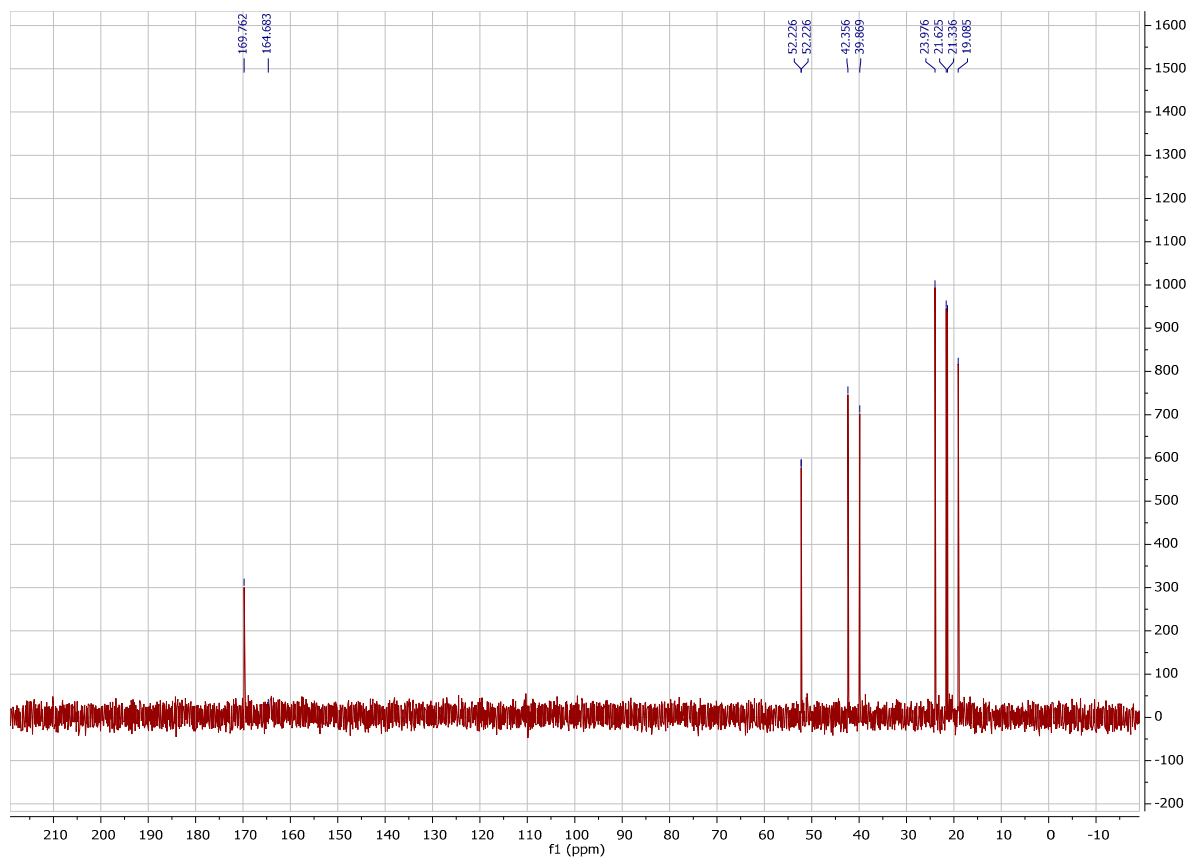

SUNAND-NJCFP-WR-A (0.037) Is (1.00,0.01) C9H18N6OH

1: TOF MS ASAP+  
8.84e12

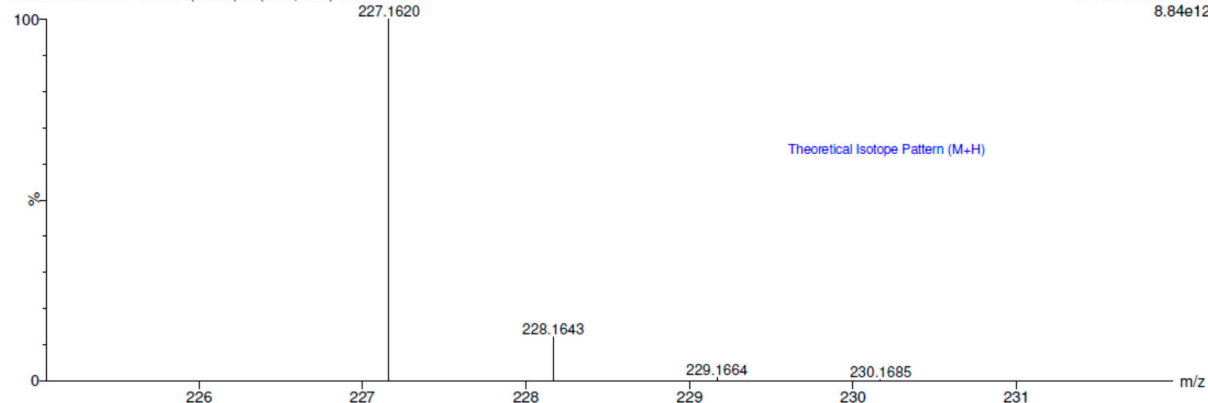

SUNAND-NJCFP-WR-A 283 (2.627) AM (Cen.4, 80.00, Ar, 10000.0,0.00,0.00); Cm (280:288)

1: TOF MS ASAP+  
6.27e6

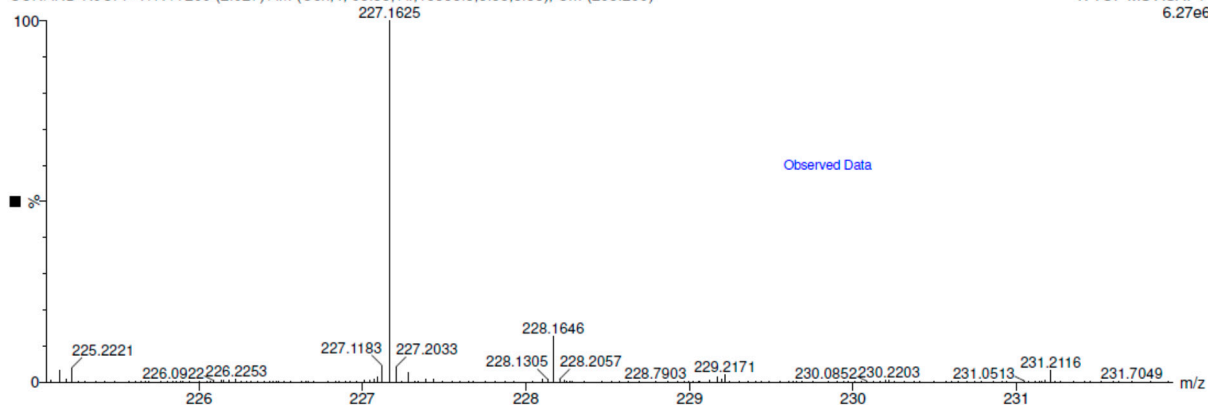

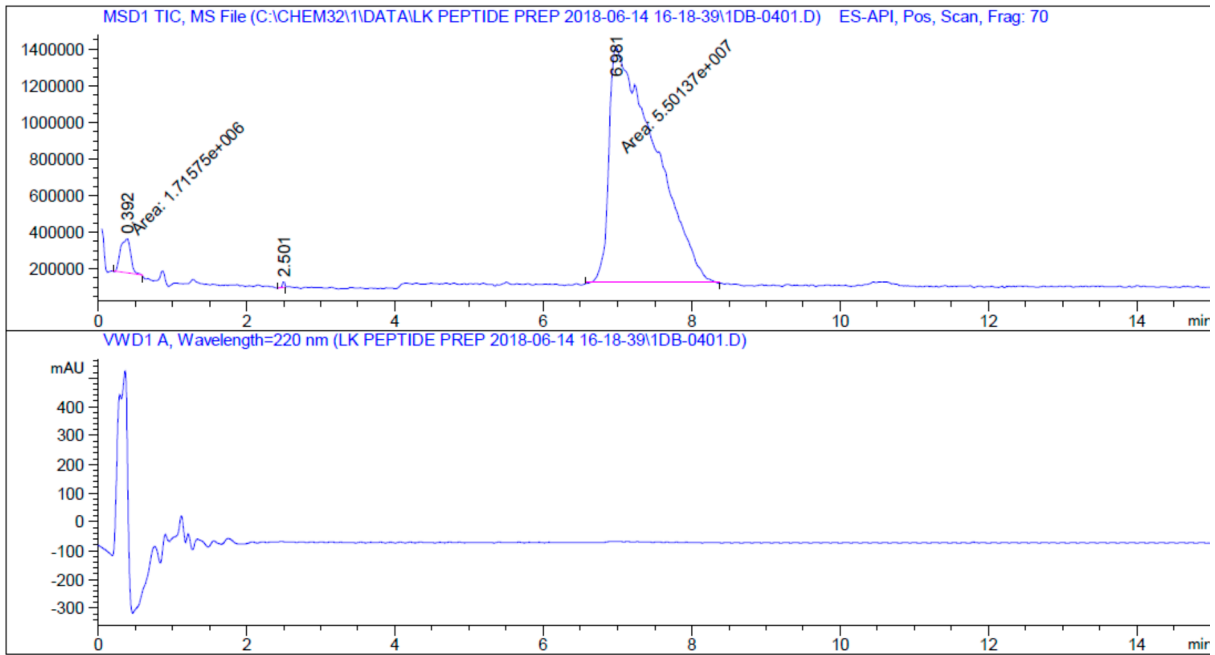

=====  
 Area Percent Report  
 =====

Sorted By : Signal  
 Multiplier: : 1.0000  
 Dilution: : 1.0000  
 Use Multiplier & Dilution Factor with ISTDs

Signal 1: MSD1 TIC, MS File

| Peak # | RetTime [min] | Type | Width [min] | Area      | Height    | Area %  |
|--------|---------------|------|-------------|-----------|-----------|---------|
| 1      | 0.392         | MM   | 0.1524      | 1.71575e6 | 1.87597e5 | 3.0210  |
| 2      | 2.501         | BB   | 0.0337      | 6.38562e4 | 3.15880e4 | 0.1124  |
| 3      | 6.981         | MM   | 0.7142      | 5.50137e7 | 1.28389e6 | 96.8665 |

Totals : 5.67933e7 1.50308e6

Benzyl-*N*-[(1*S*,2*S*)-2-methyl-1-[(1*S*)-1-(1*H*-1,2,3,4-tetrazol-5-yl)ethyl]carbamoyl]butyl]carbamate **13i-LL**:

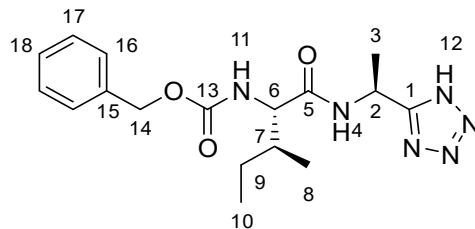

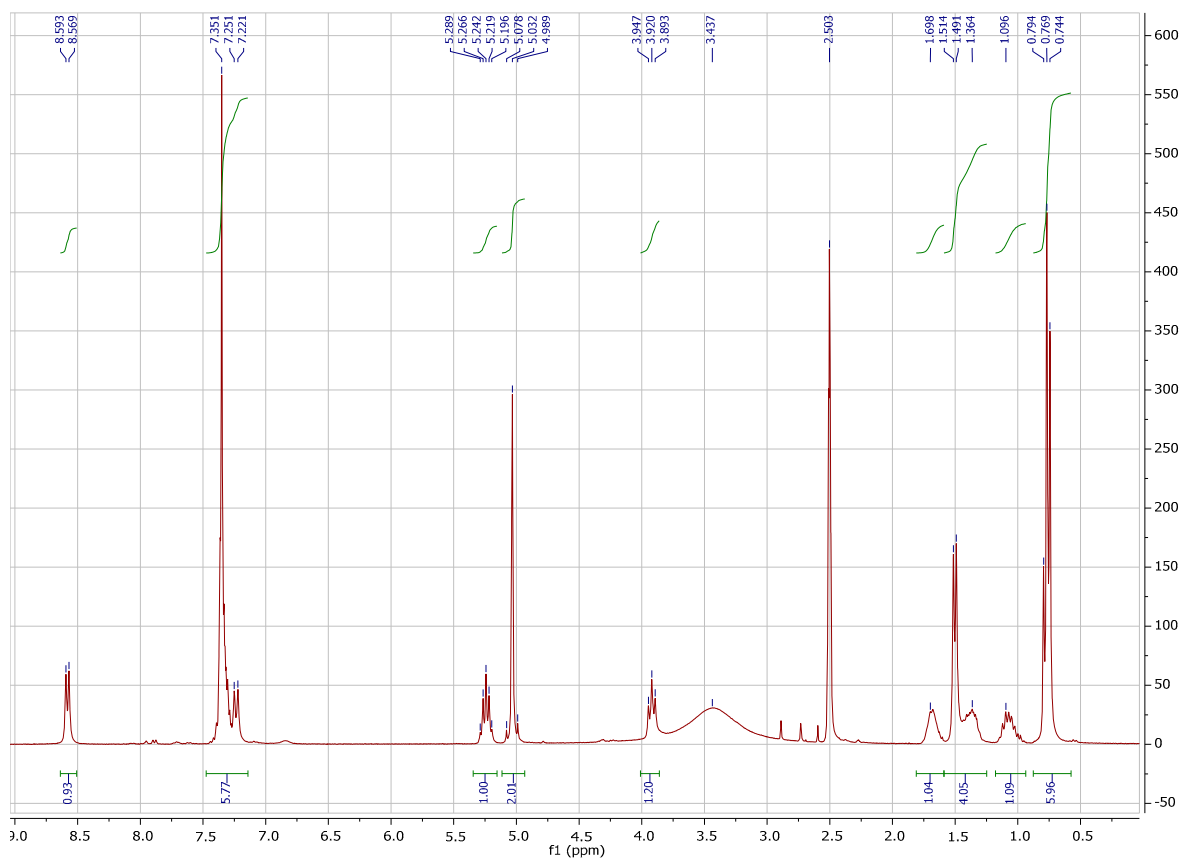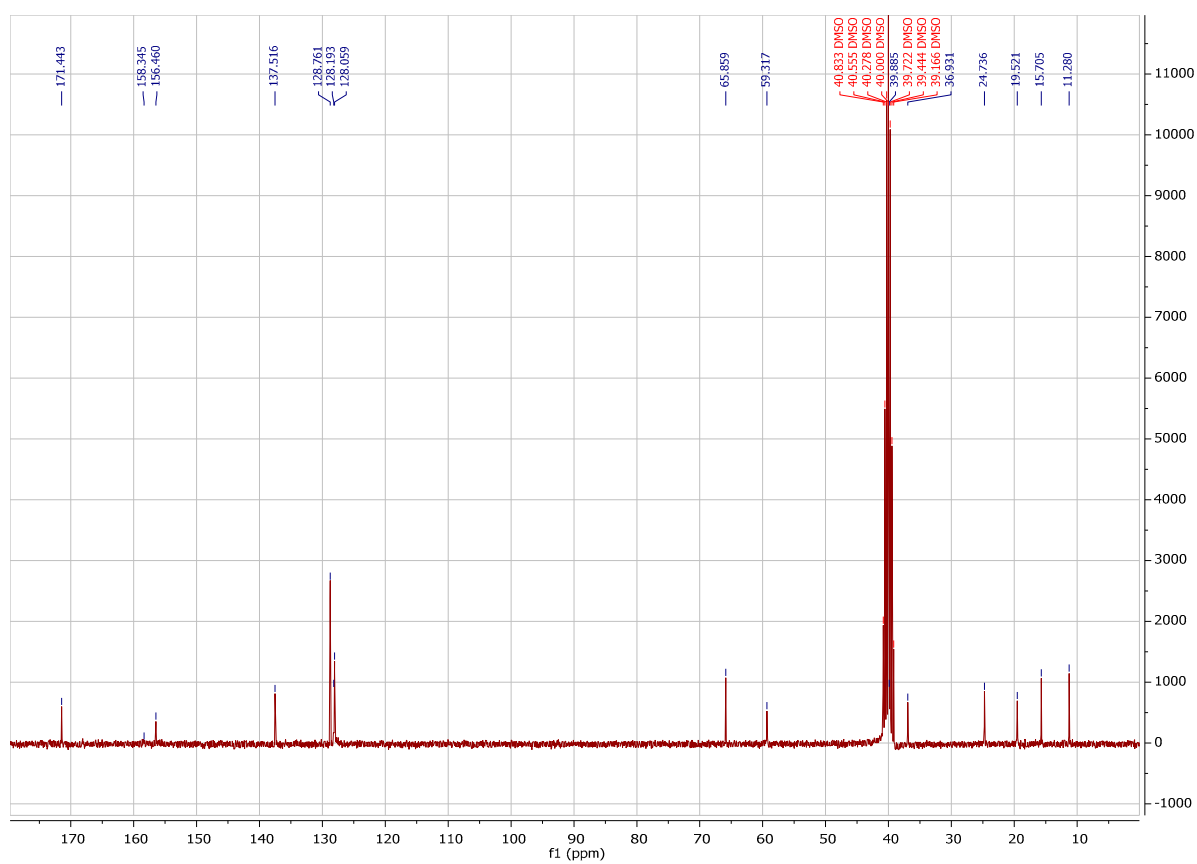

(2S,3S)-2-amino-3-methyl-N-[(1S)-1-(1H-1,2,3,4-tetrazol-5-yl)ethyl]pentanamide **14i-LL**

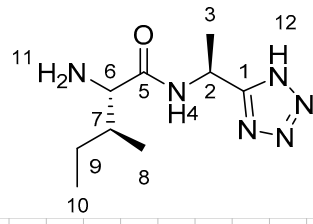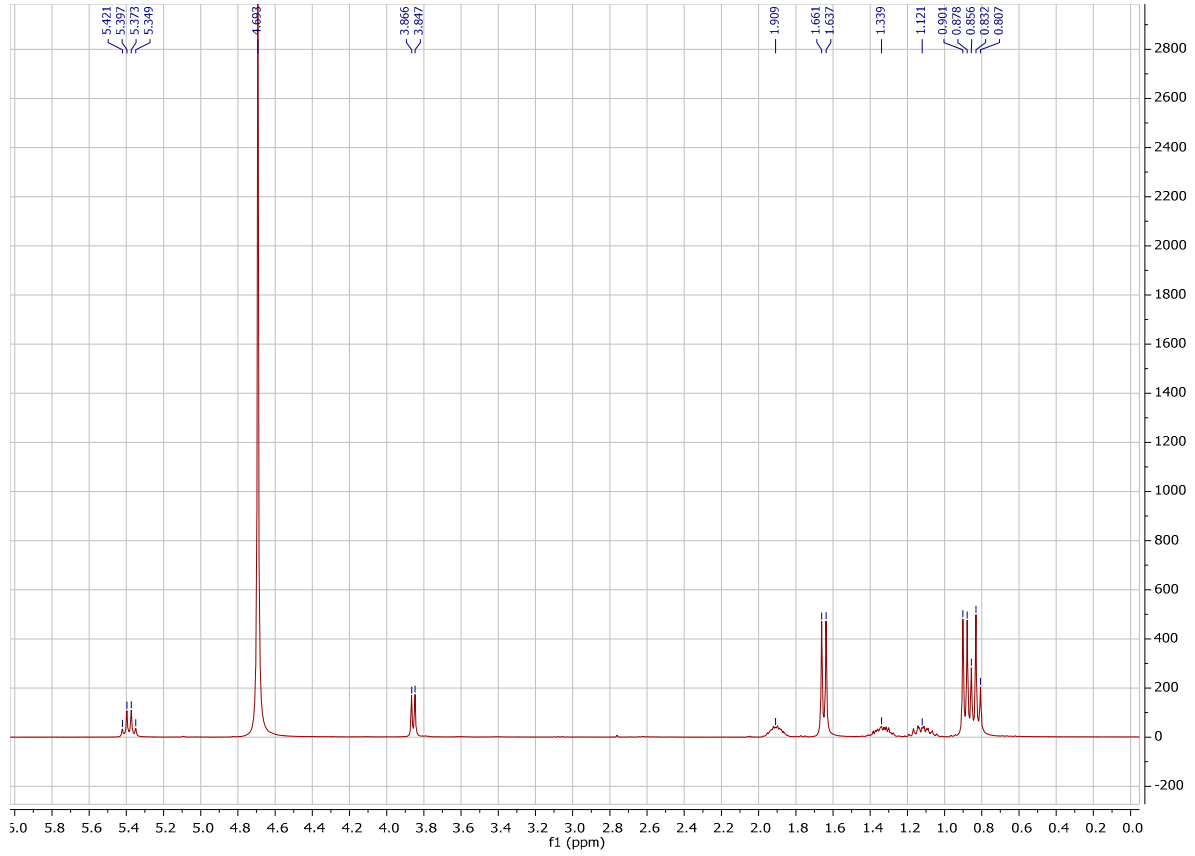

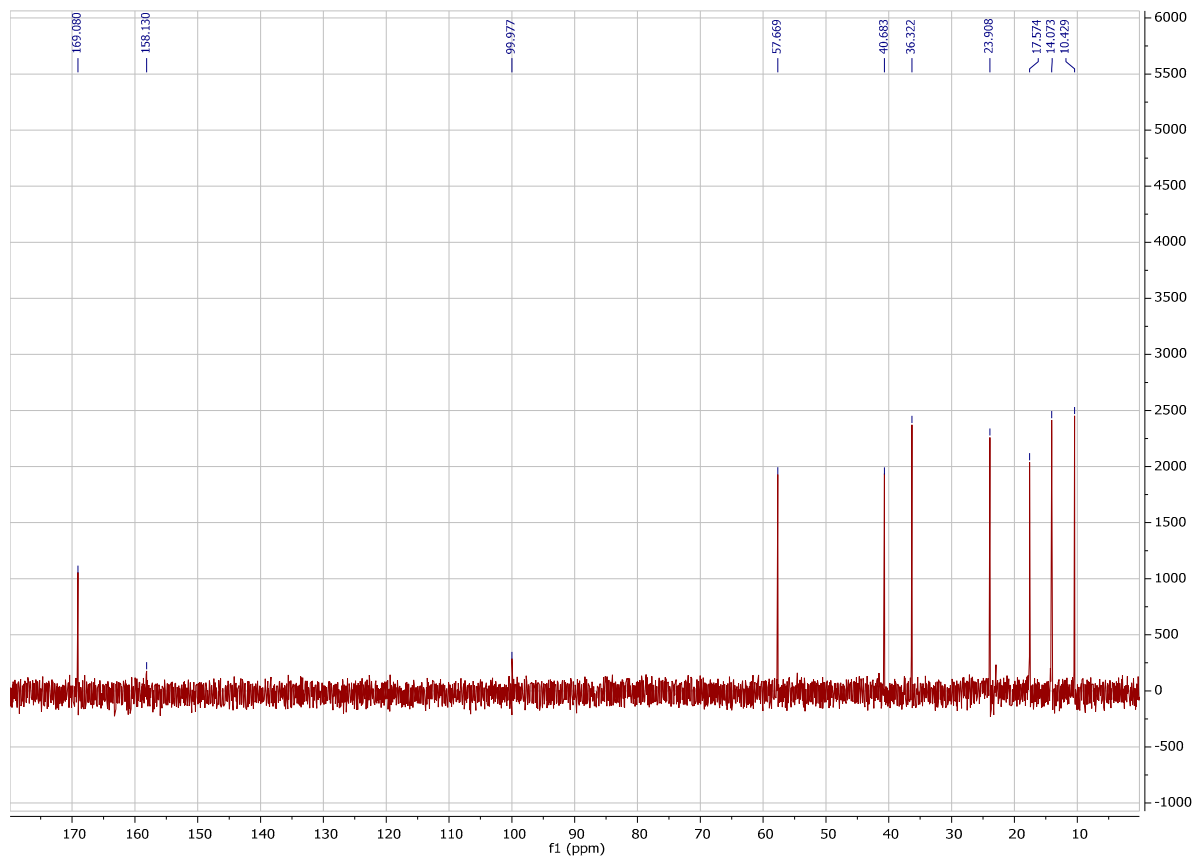



SM: 7G

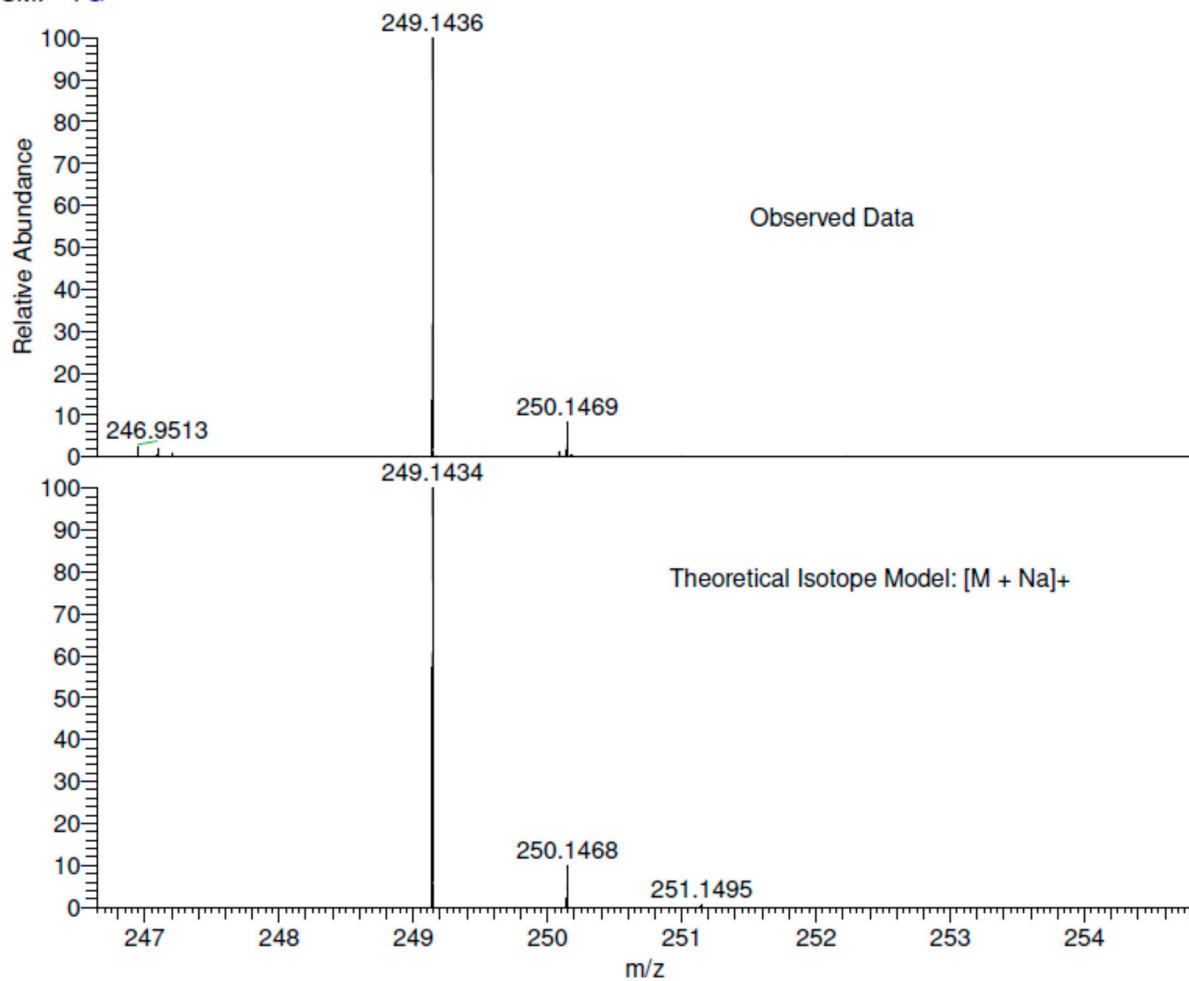

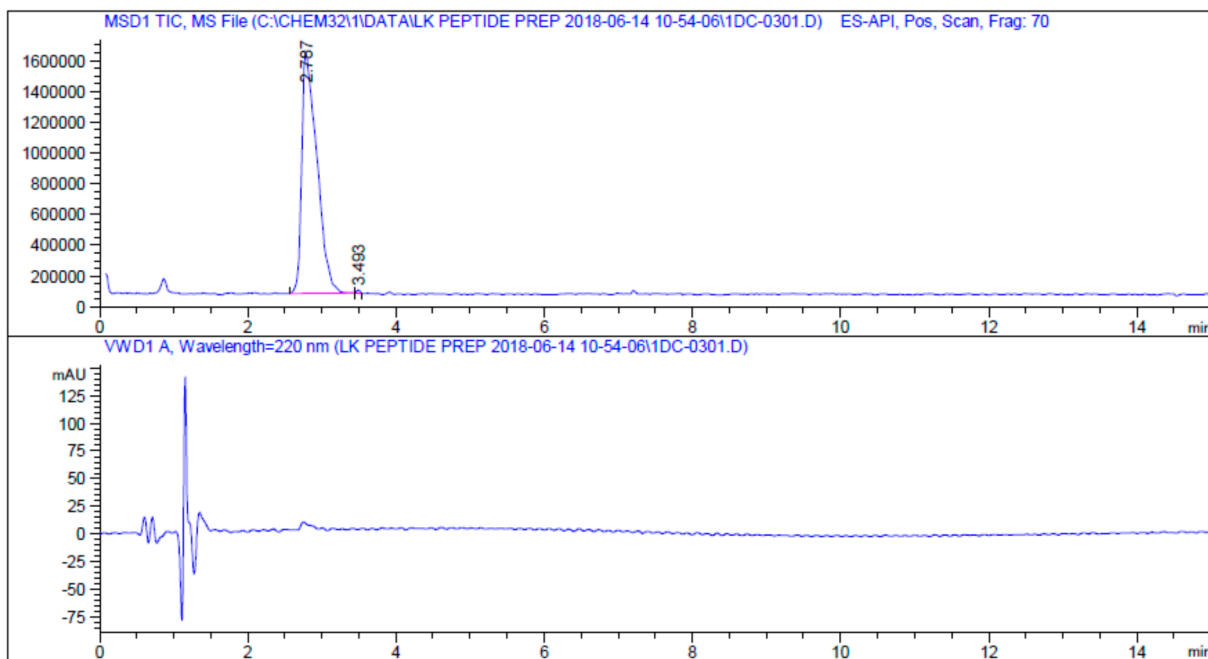

=====  
 Area Percent Report  
 =====

Sorted By : Signal  
 Multiplier: : 1.0000  
 Dilution: : 1.0000  
 Use Multiplier & Dilution Factor with ISTDs

Signal 1: MSD1 TIC, MS File

| Peak # | RetTime [min] | Type | Width [min] | Area      | Height    | Area %  |
|--------|---------------|------|-------------|-----------|-----------|---------|
| 1      | 2.787         | BB   | 0.1981      | 2.22201e7 | 1.56789e6 | 99.6797 |
| 2      | 3.493         | BB   | 0.0522      | 7.13974e4 | 2.32827e4 | 0.3203  |

Totals : 2.22915e7 1.59117e6

**Benzyl-(5S)-2-oxo-5-[[1(1S)-1-(1H-1,2,3,4-tetrazol-5-yl)ethyl]carbamoyl]pyrrolidine-1-carboxylate 13f-LL:**

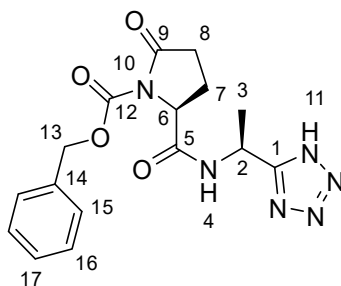

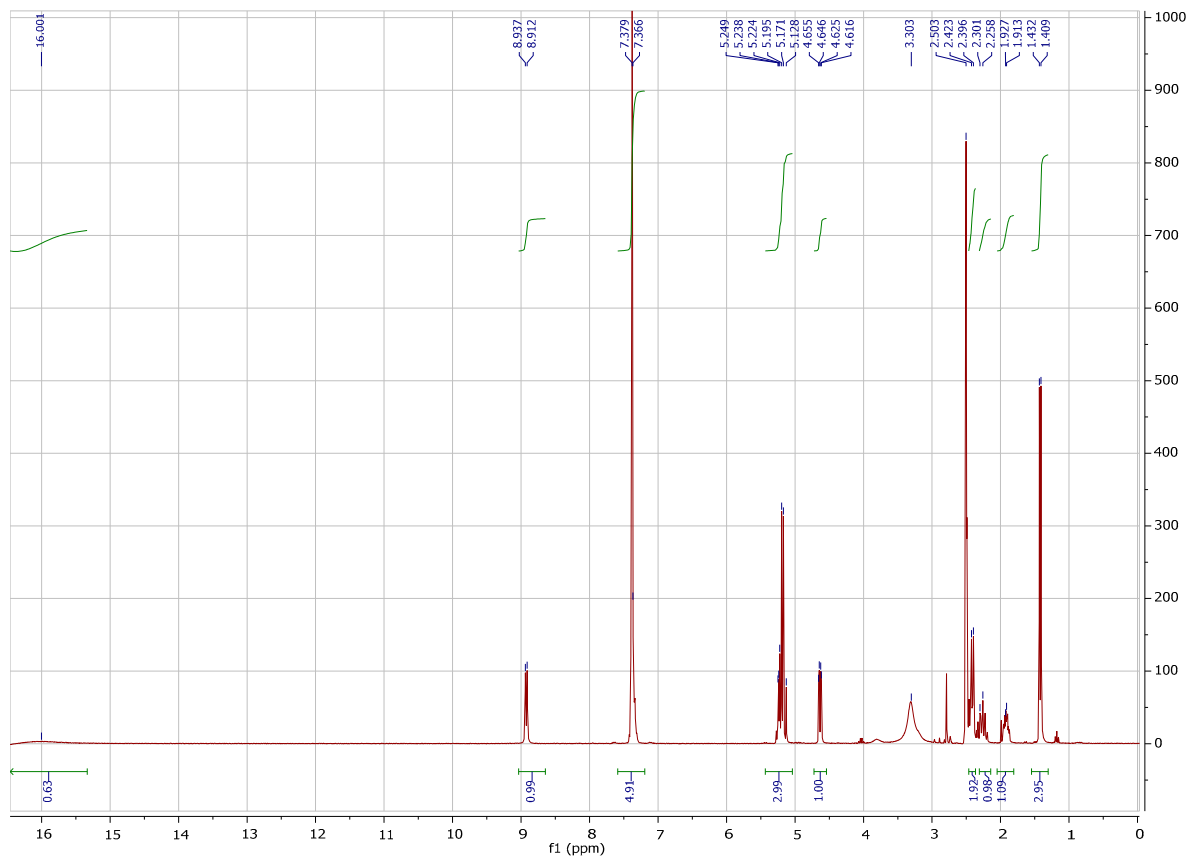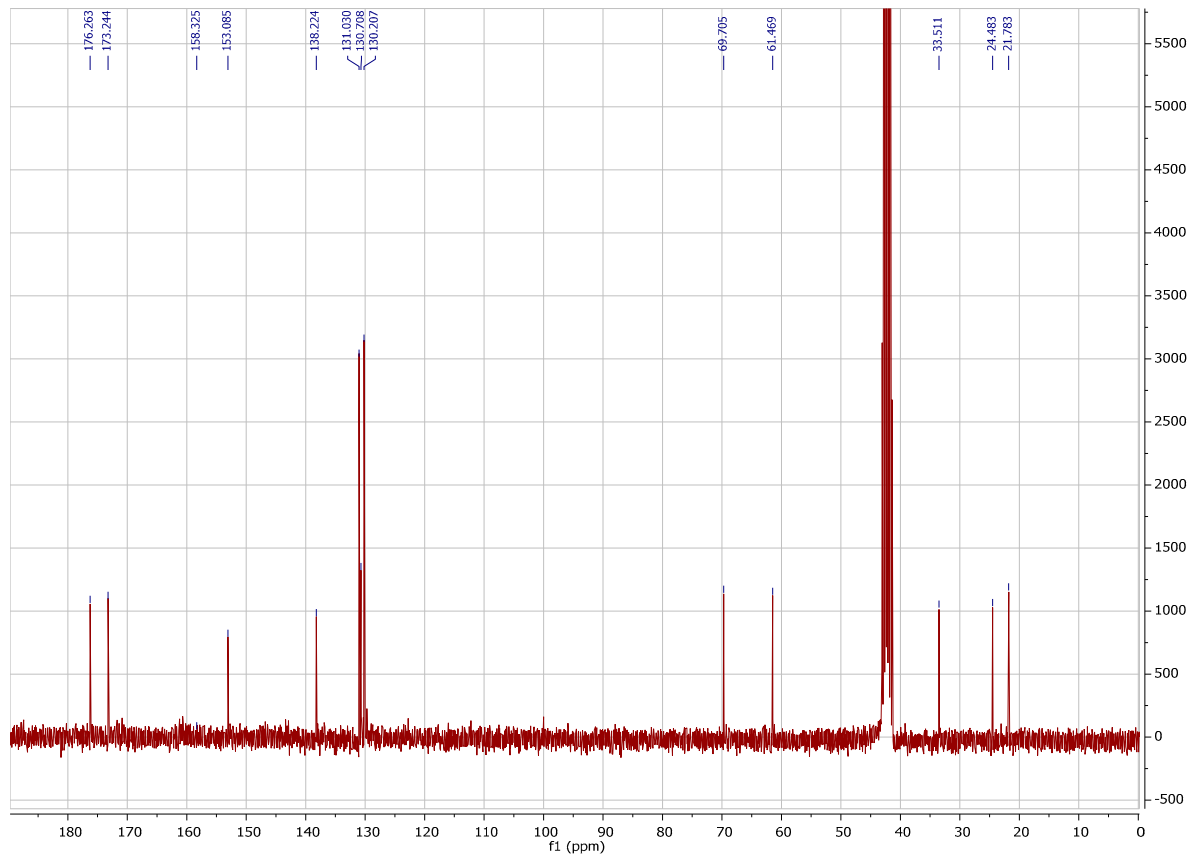

(S)-N-((S)-1-(1H-tetrazol-5-yl)ethyl)-5-oxopyrrolidine-2-carboxamide **14f-LL**:

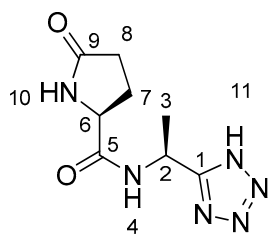

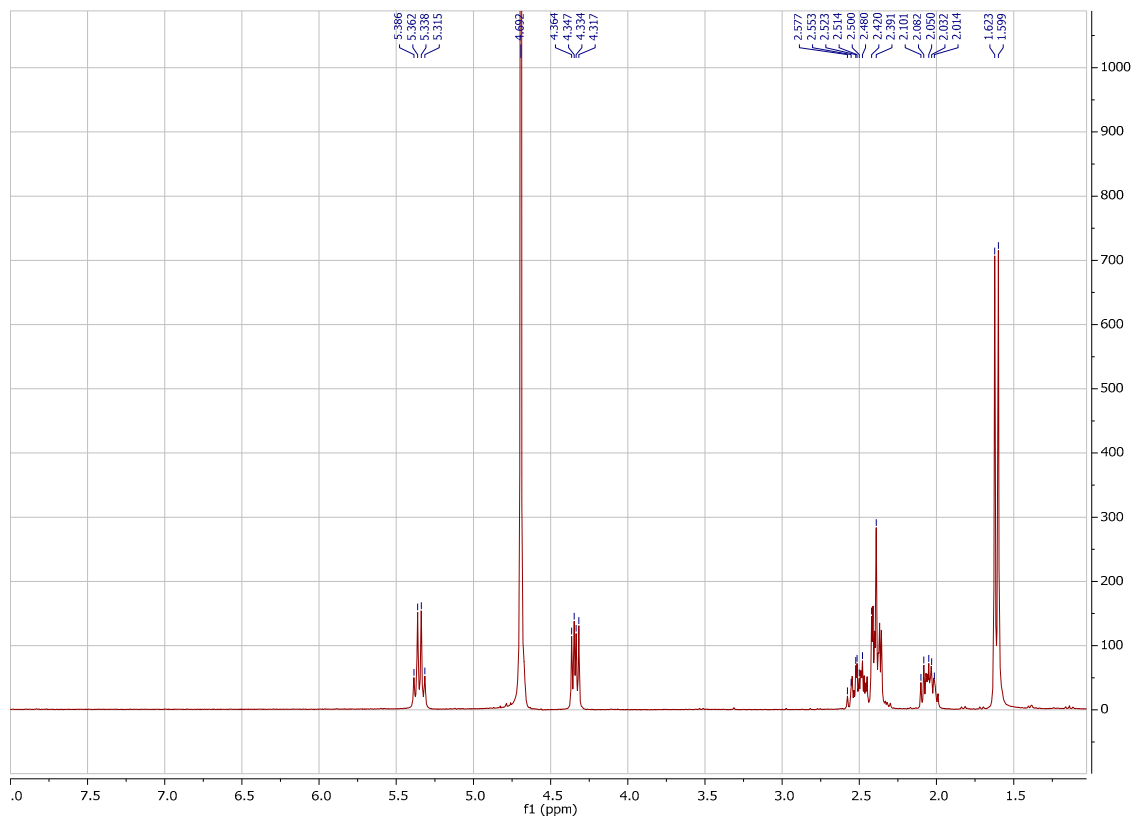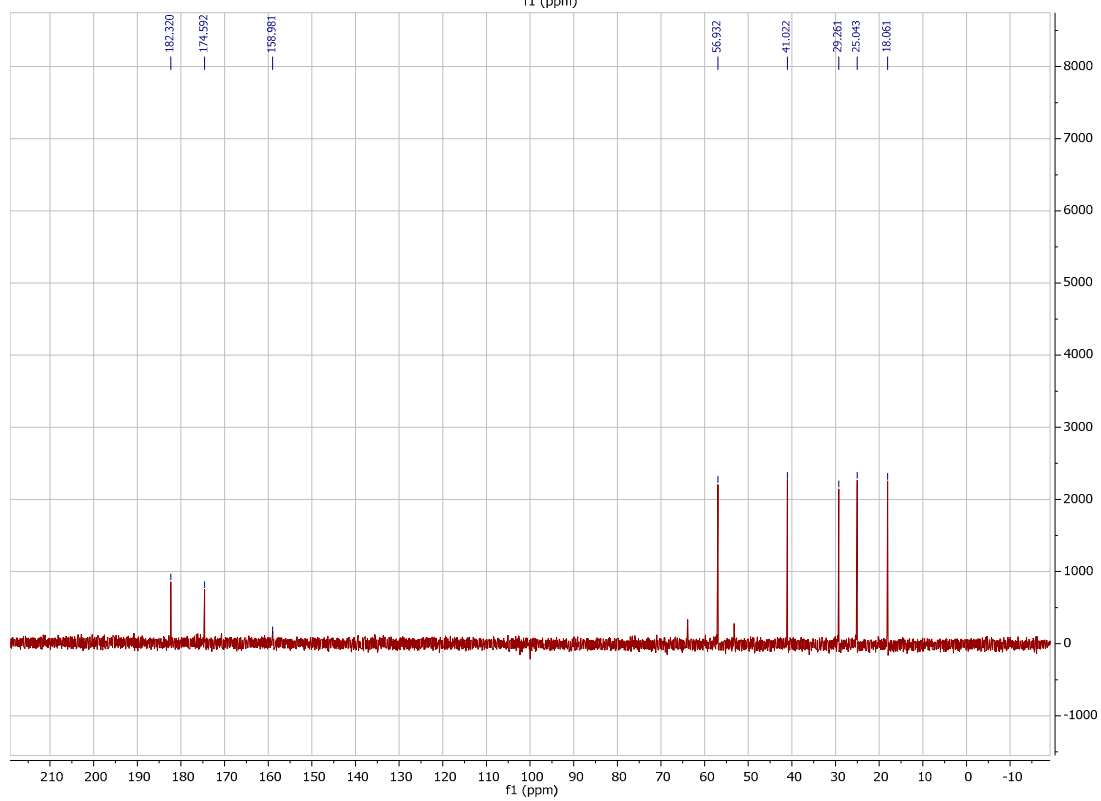

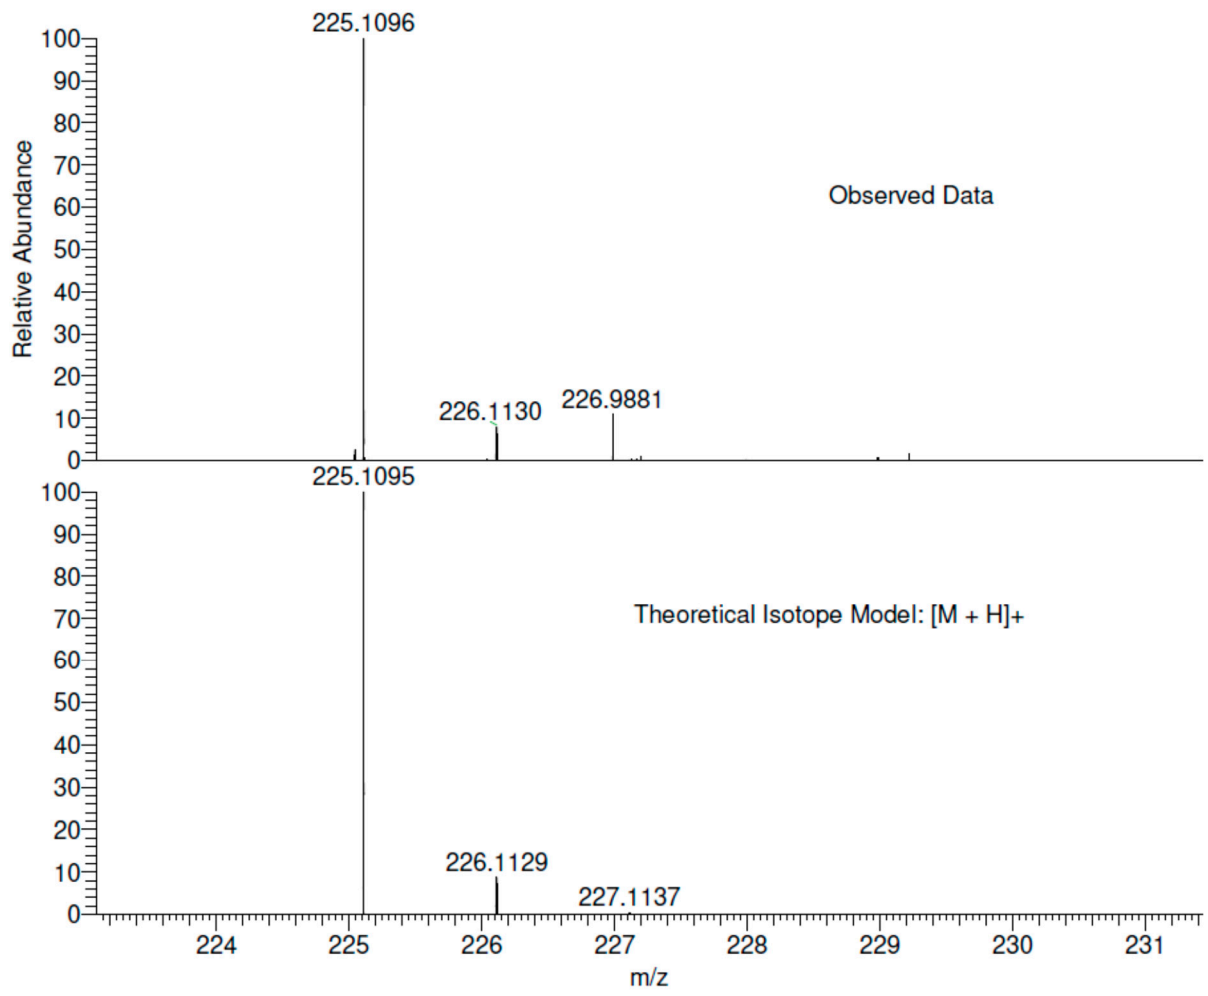

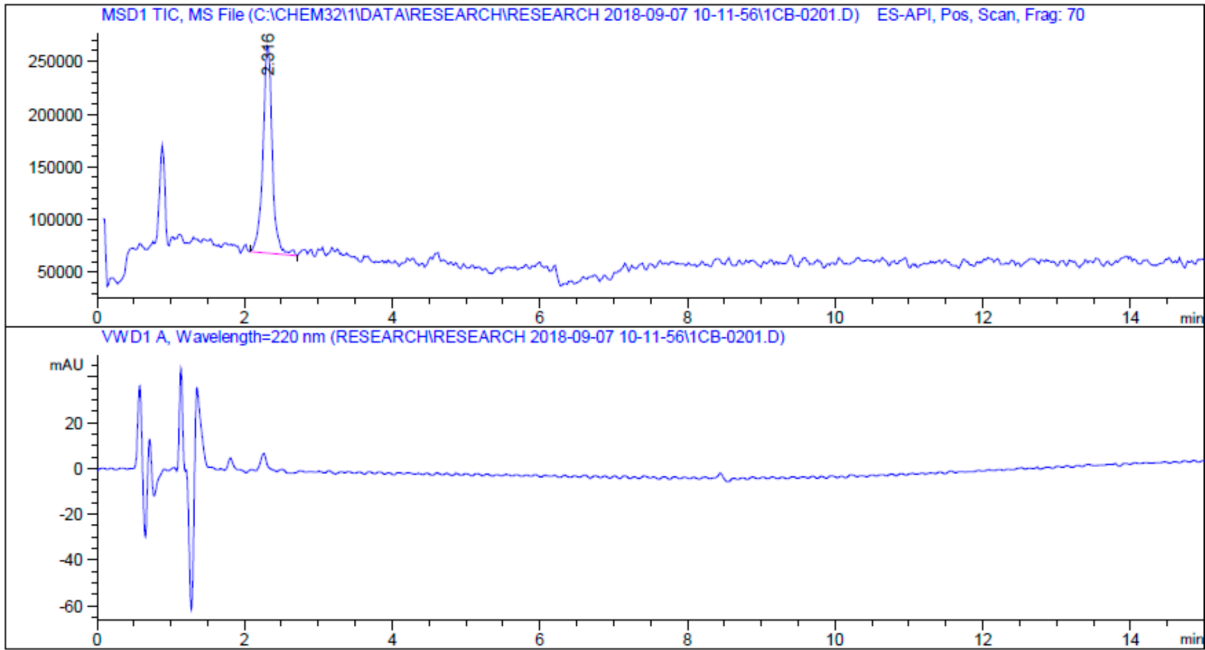

=====  
 Area Percent Report  
 =====

Sorted By : Signal  
 Multiplier: : 1.0000  
 Dilution: : 1.0000  
 Use Multiplier & Dilution Factor with ISTDs

Signal 1: MSD1 TIC, MS File

| Peak # | RetTime [min] | Type | Width [min] | Area      | Height    | Area %   |
|--------|---------------|------|-------------|-----------|-----------|----------|
| 1      | 2.316         | BB   | 0.1342      | 1.72300e6 | 1.98295e5 | 100.0000 |

Totals : 1.72300e6 1.98295e5

Blank for 16f-LL:

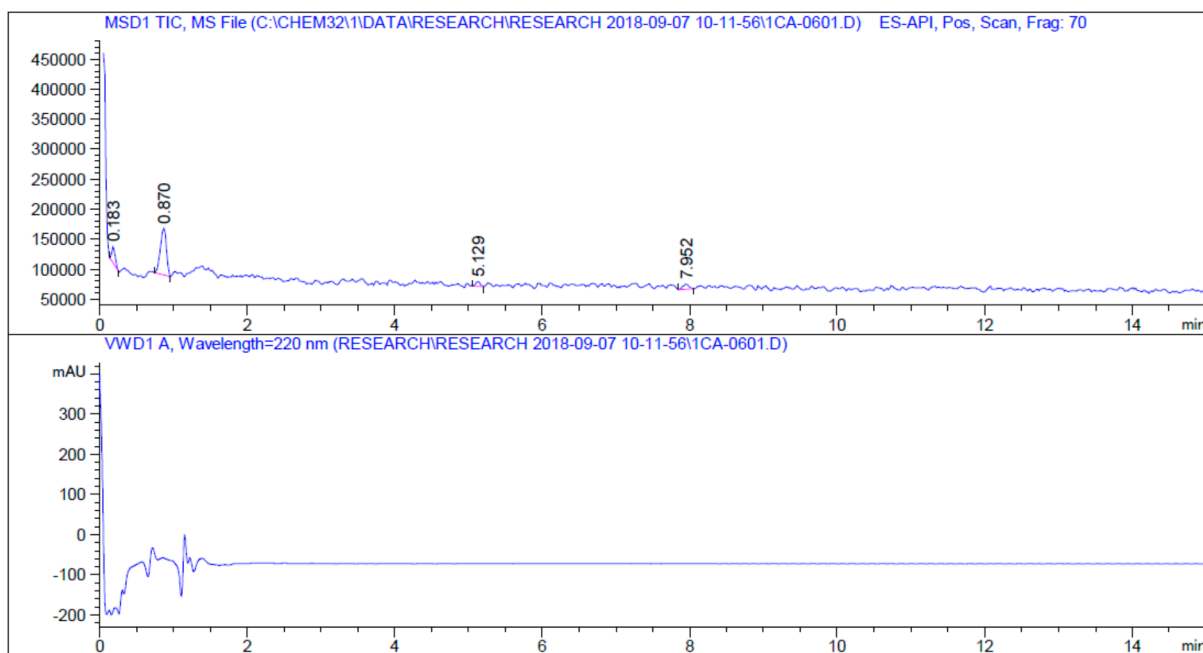

Benzyl-*N*-[(1*S*)-2-phenyl-1-[(1*S*)-1-(1*H*-1,2,3,4-tetrazol-5-yl)ethyl]carbamoyl]ethyl]carbamate  
**13j-LL**:

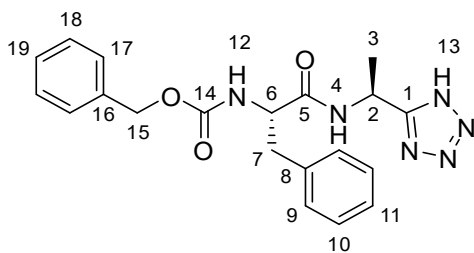



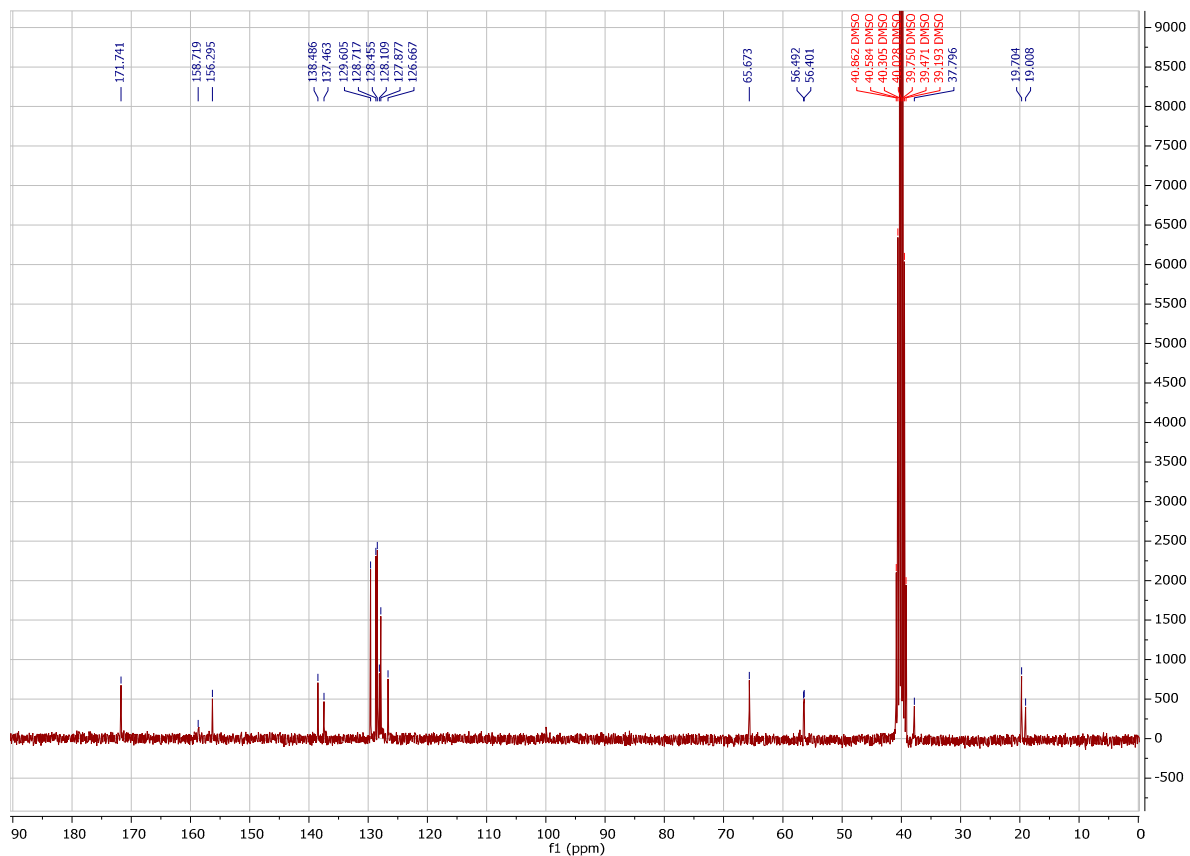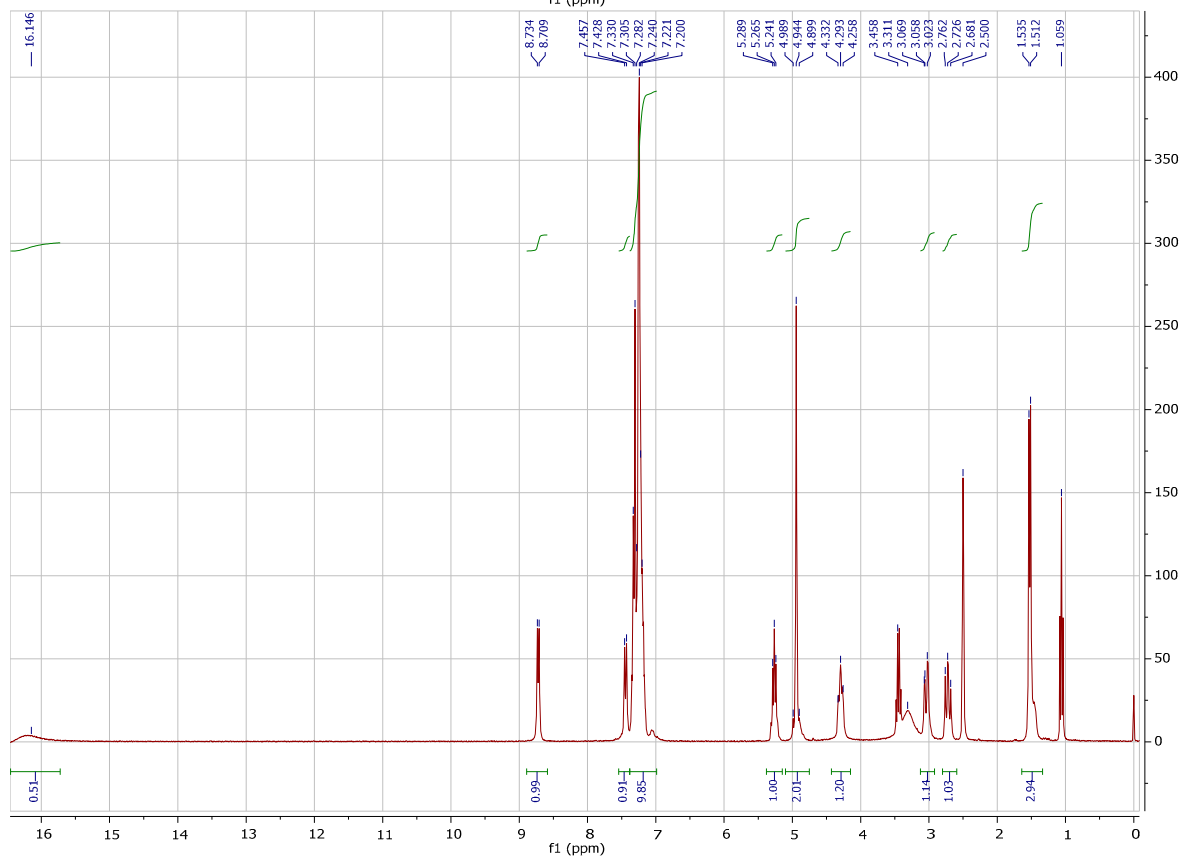

(2S)-2-Amino-3-phenyl-N-[(1S)-1-(1H-1,2,3,4-tetrazol-5-yl)ethyl]propanamide **14j-LL**:

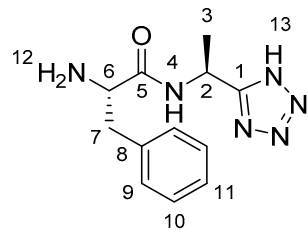

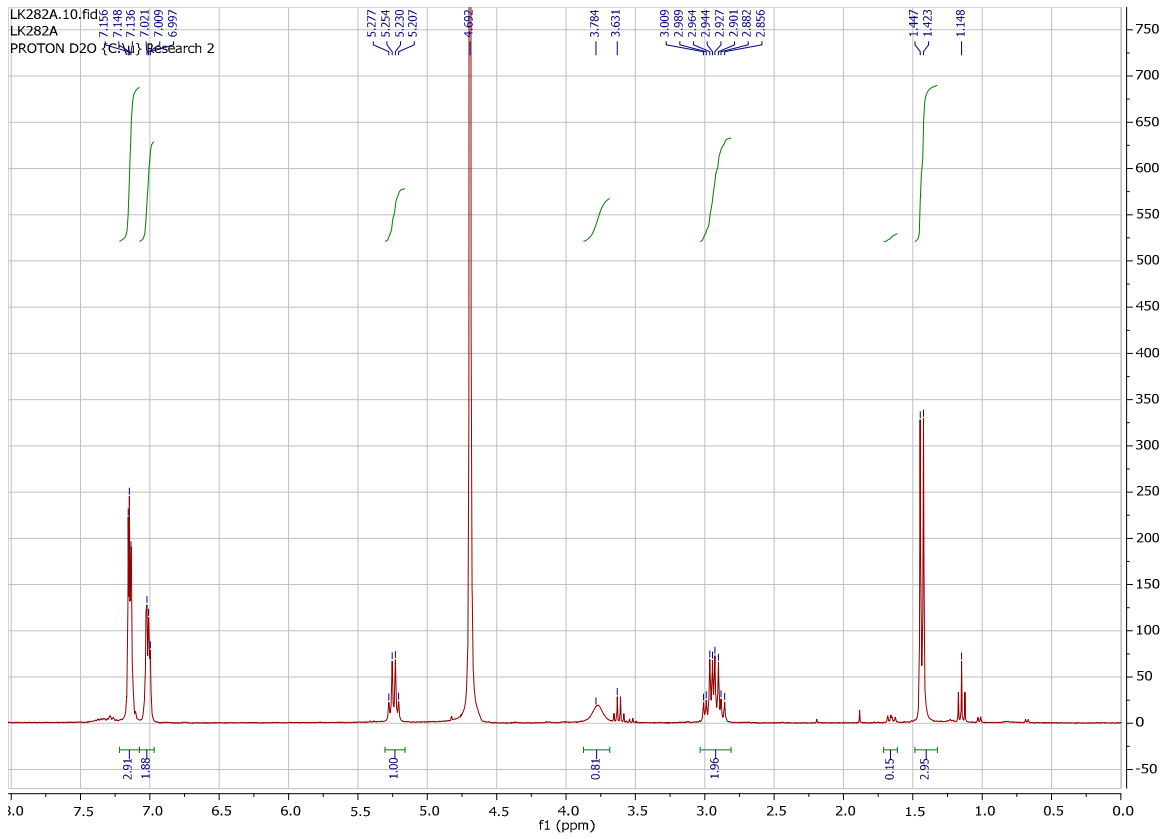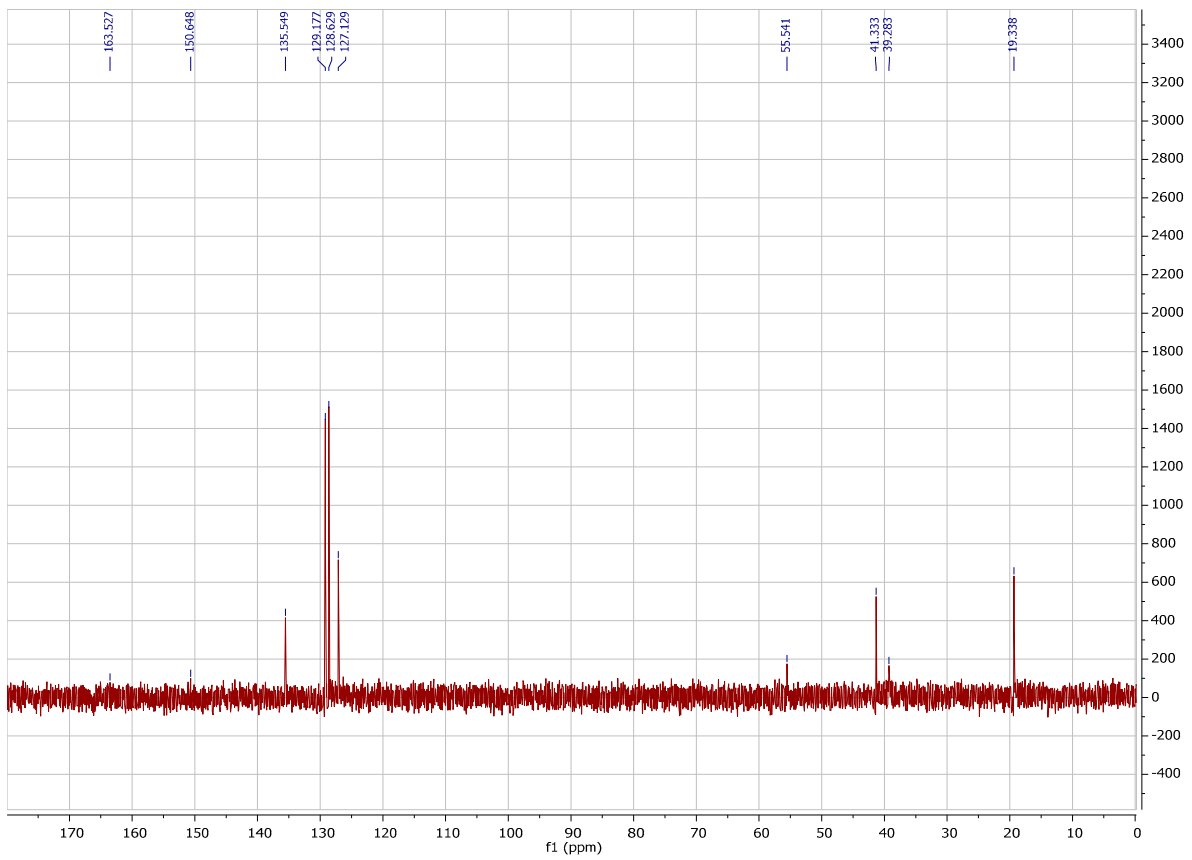

SM: 7G

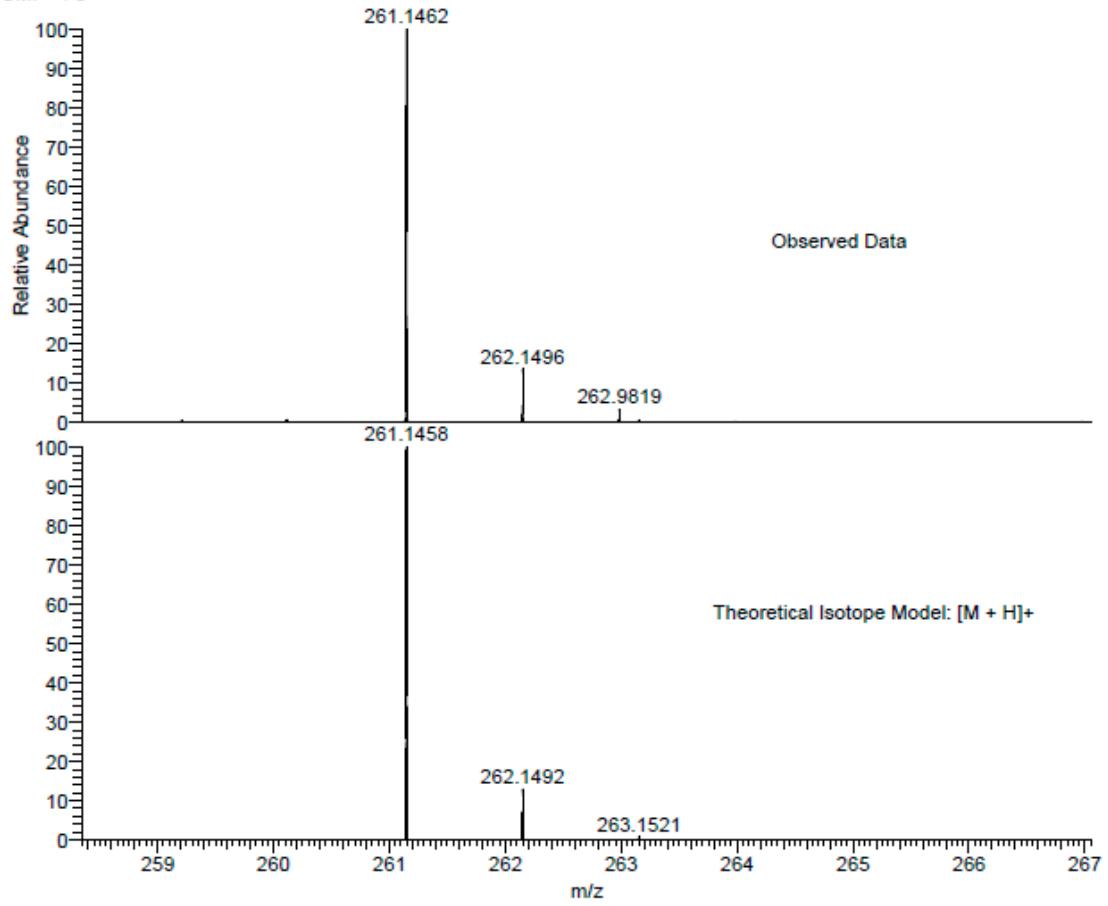

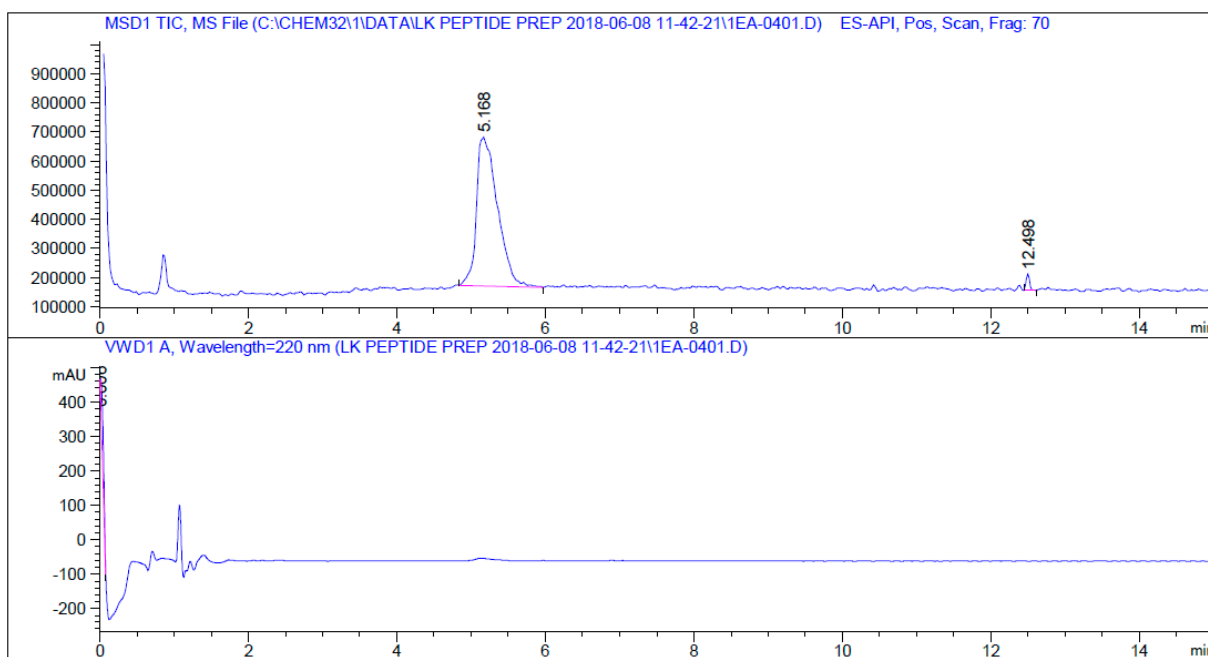

=====  
 Area Percent Report  
 =====

Sorted By : Signal  
 Multiplier: : 1.0000  
 Dilution: : 1.0000  
 Use Multiplier & Dilution Factor with ISTDs

Signal 1: MSD1 TIC, MS File

| Peak # | RetTime [min] | Type | Width [min] | Area      | Height    | Area %  |
|--------|---------------|------|-------------|-----------|-----------|---------|
| 1      | 5.168         | BB   | 0.2626      | 1.00788e7 | 5.11773e5 | 98.1589 |
| 2      | 12.498        | BB   | 0.0551      | 1.89042e5 | 5.70412e4 | 1.8411  |

Totals : 1.02678e7 5.68814e5

Benzyl-*N*-[(1*S*)-1-[(1*S*)-1-(1*H*-1,2,3,4-tetrazol-5-yl)propyl]carbamoyl]ethyl]carbamate **13b-LL**:

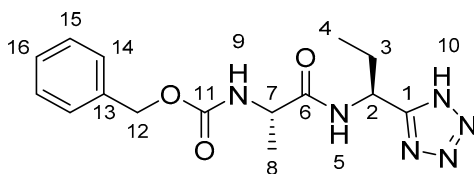

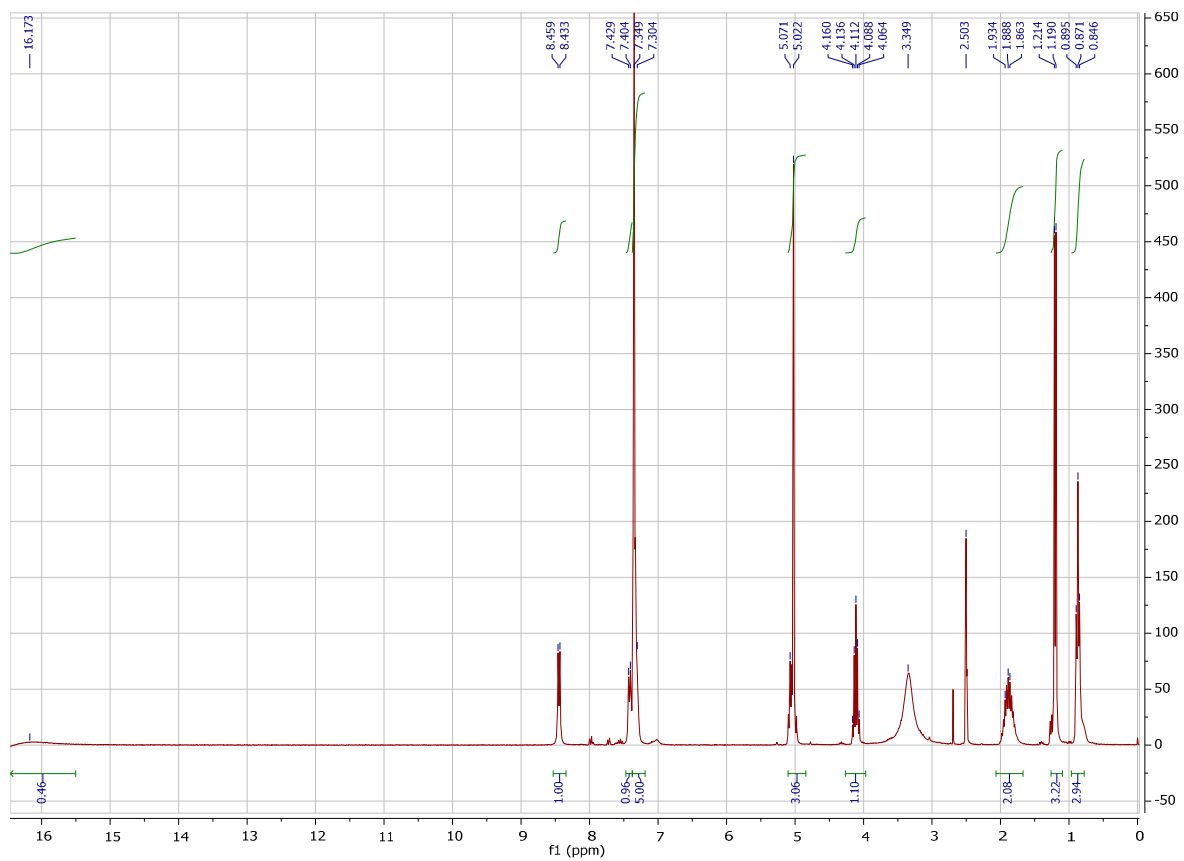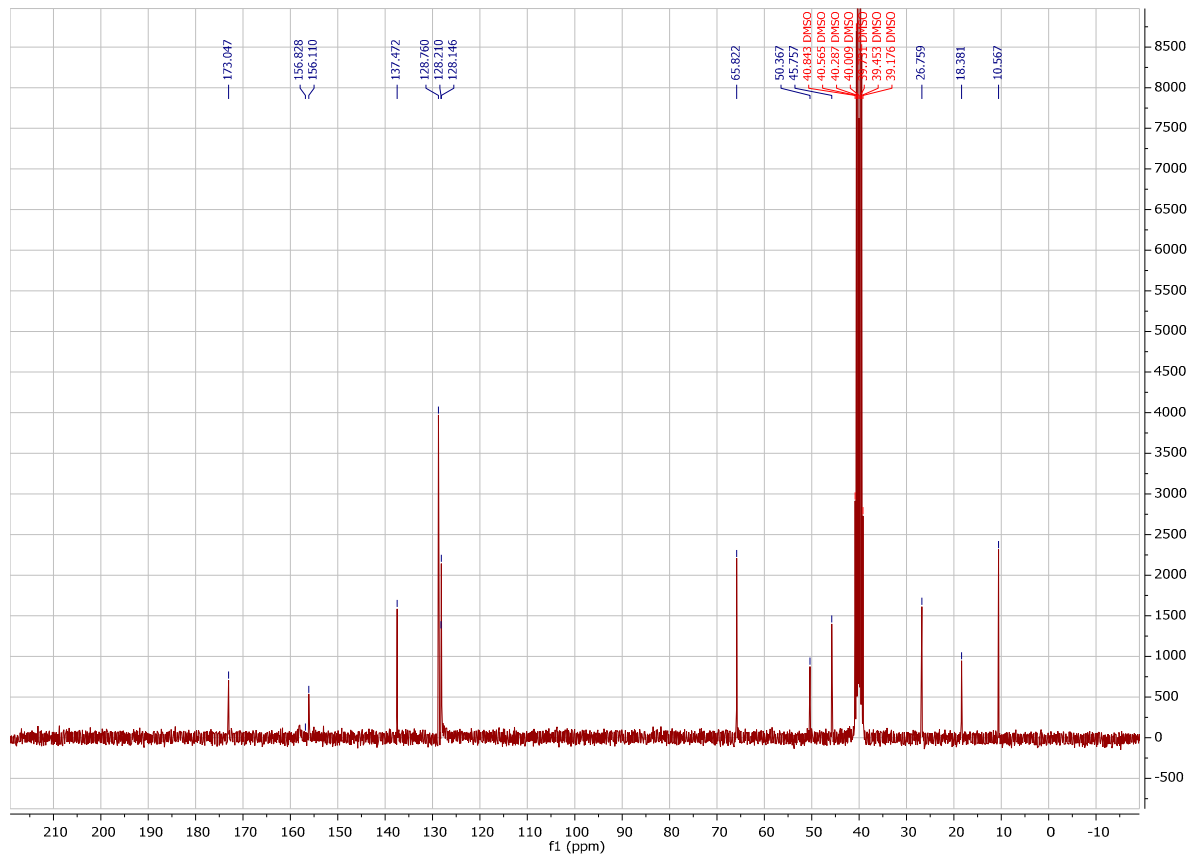

(2S)-2-Amino-N-[(1S)-1-(1H-1,2,3,4-tetrazol-5-yl)propyl]propanamide **14b-LL**:

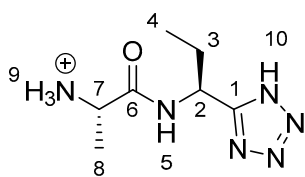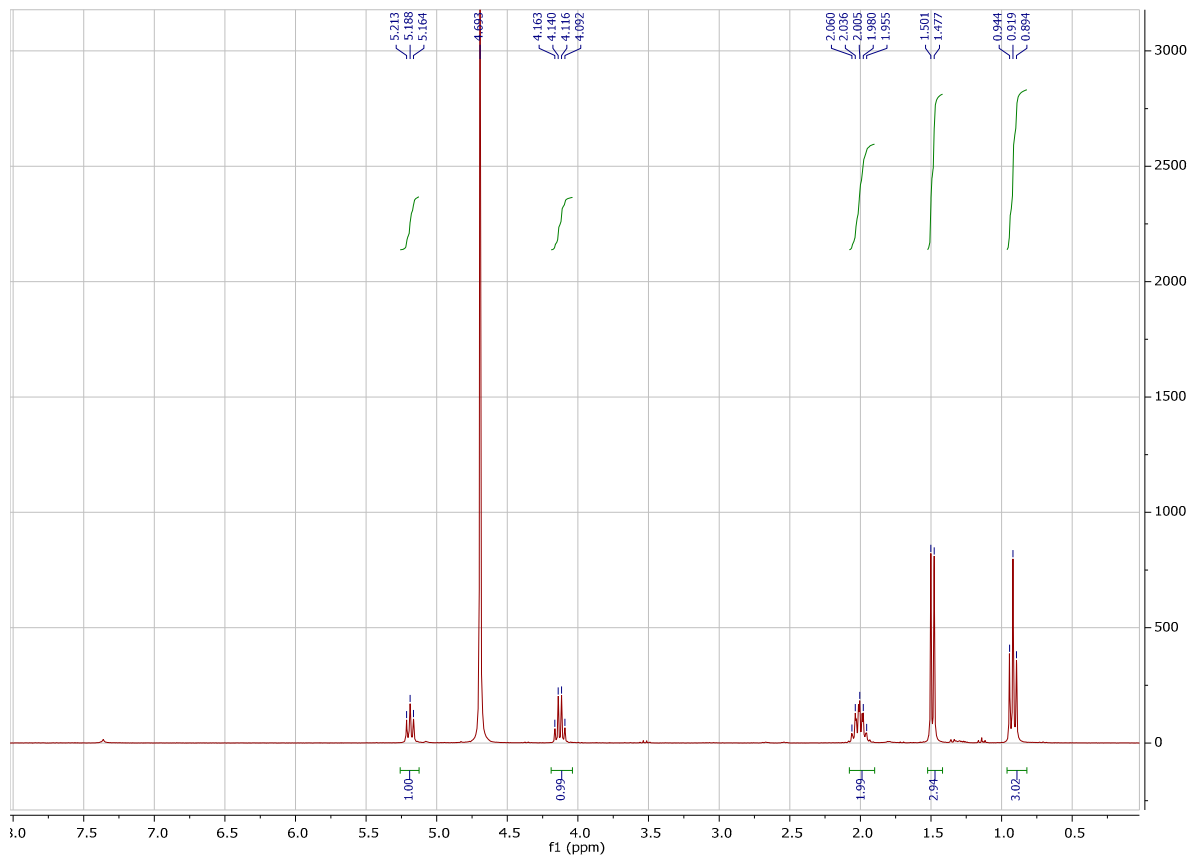

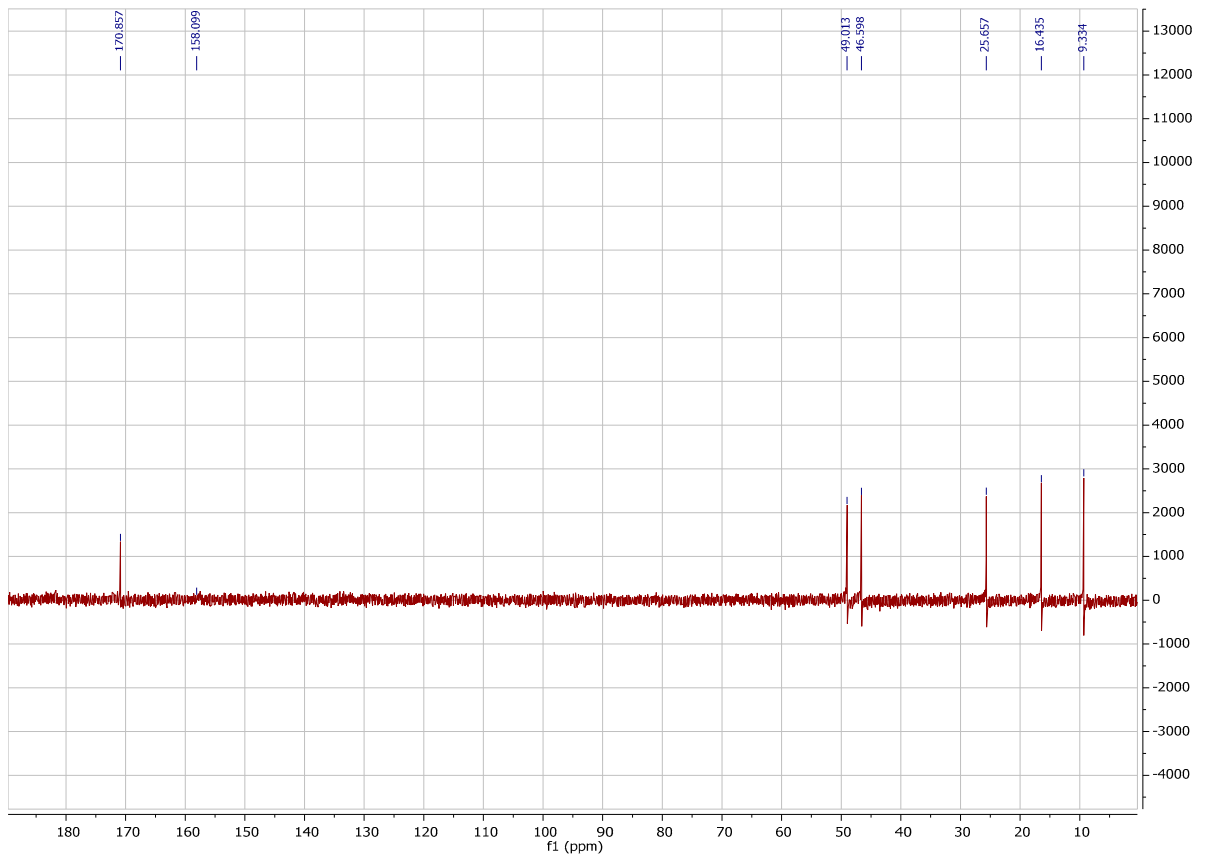



SM: 7G

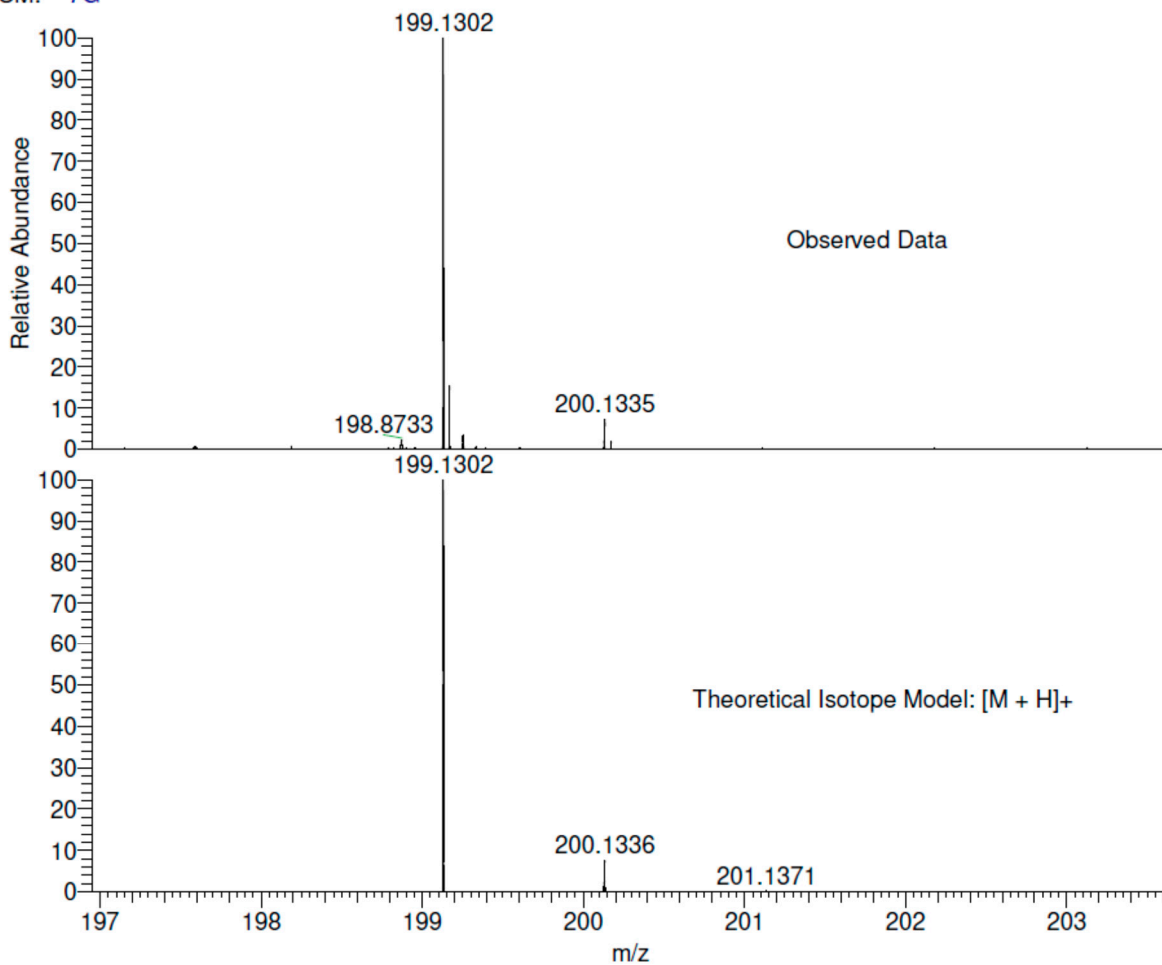

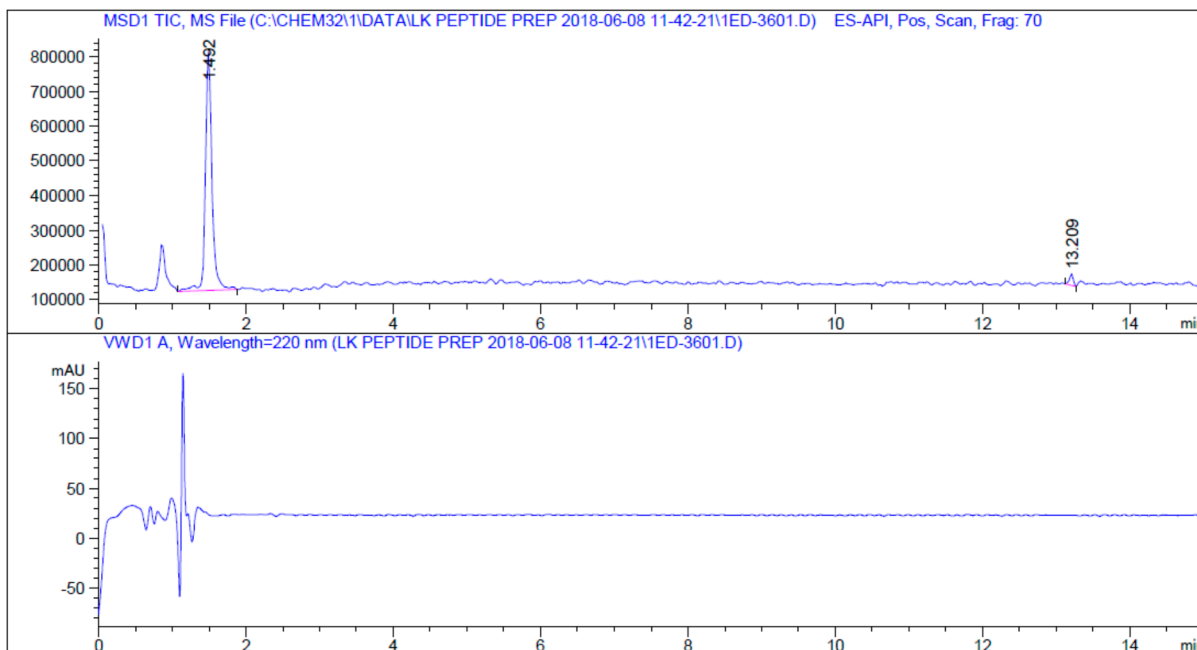

=====  
 Area Percent Report  
 =====

Sorted By : Signal  
 Multiplier: : 1.0000  
 Dilution: : 1.0000  
 Use Multiplier & Dilution Factor with ISTDs

Signal 1: MS1 TIC, MS File

| Peak # | RetTime [min] | Type | Width [min] | Area      | Height    | Area %  |
|--------|---------------|------|-------------|-----------|-----------|---------|
| 1      | 1.492         | BB   | 0.0888      | 4.28483e6 | 6.90281e5 | 97.1740 |
| 2      | 13.209        | BB   | 0.0588      | 1.24610e5 | 3.43131e4 | 2.8260  |

Totals : 4.40944e6 7.24594e5

*N*-[(1*S*)-1-[[*(1S)*-1-[[*(1S)*-1-(1*H*-1,2,3,4-tetrazol-5-yl)ethyl]carbamoyl]ethyl]carbamoyl]ethyl]carbamate **13c-LLL**:

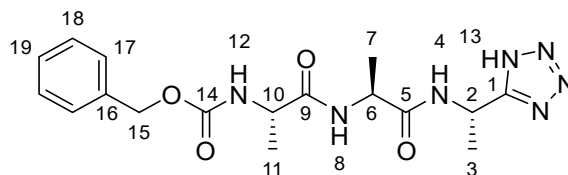

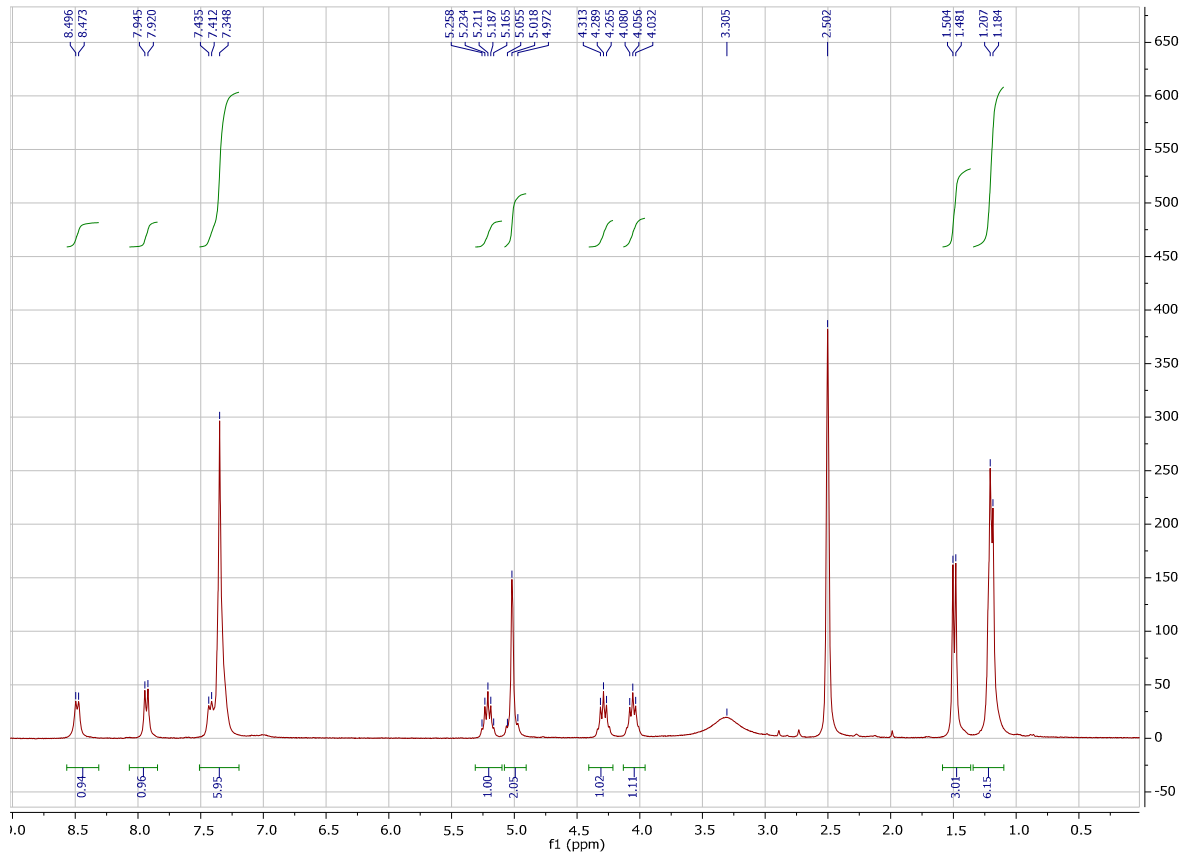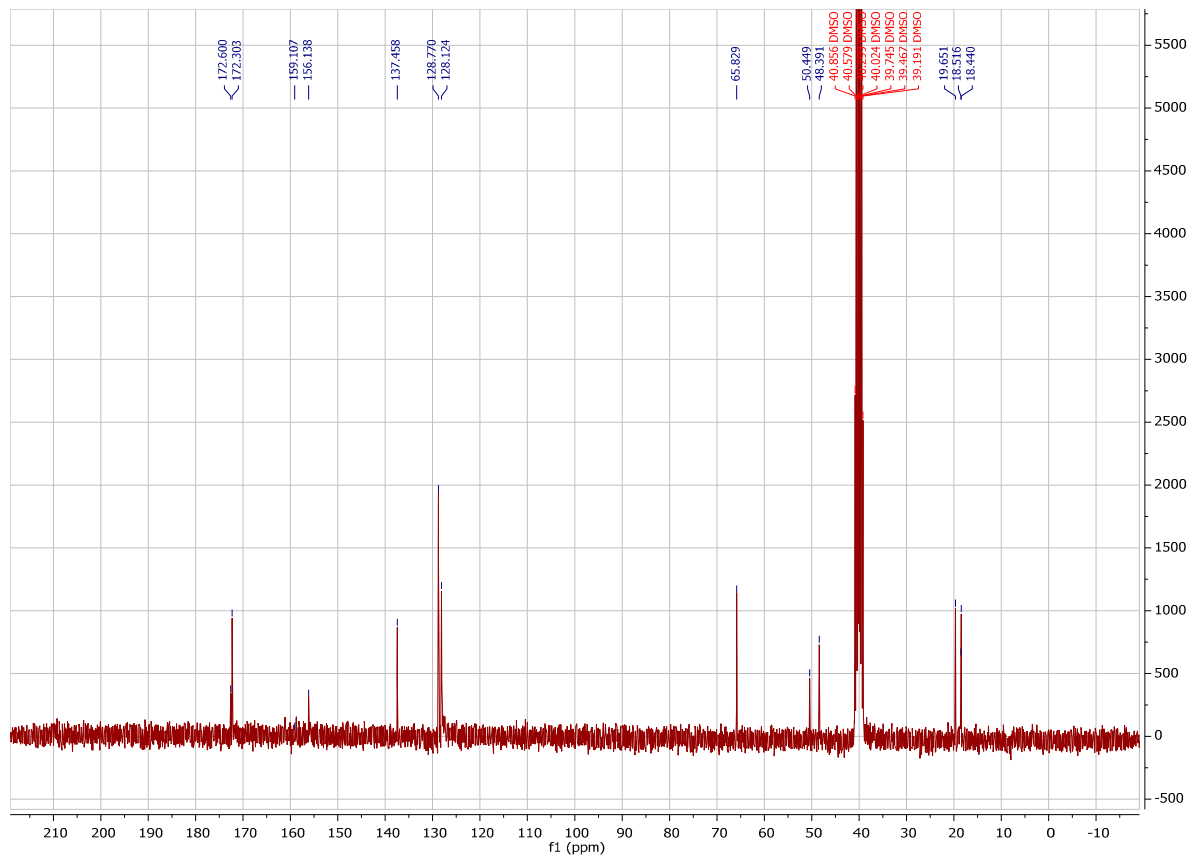

SM: 7G

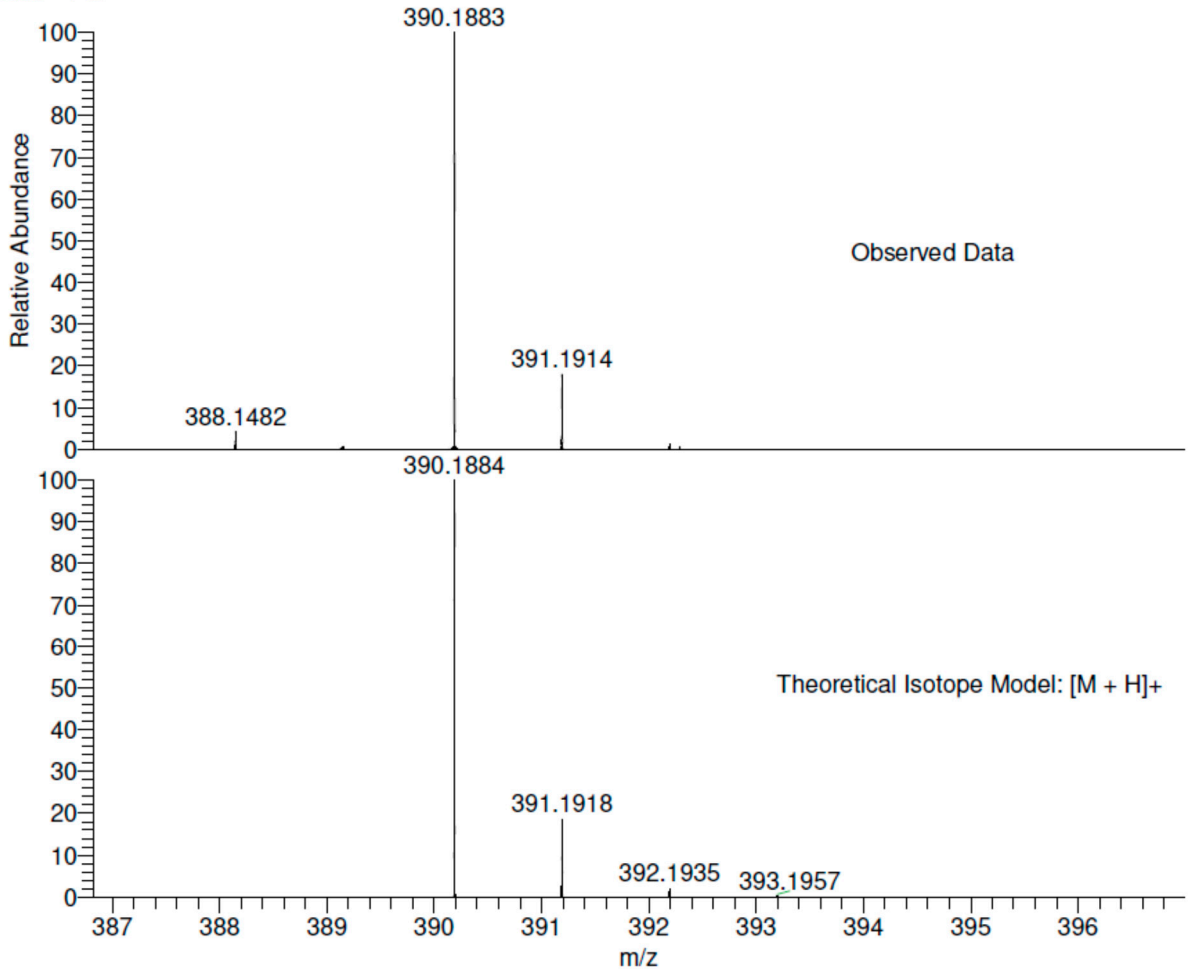

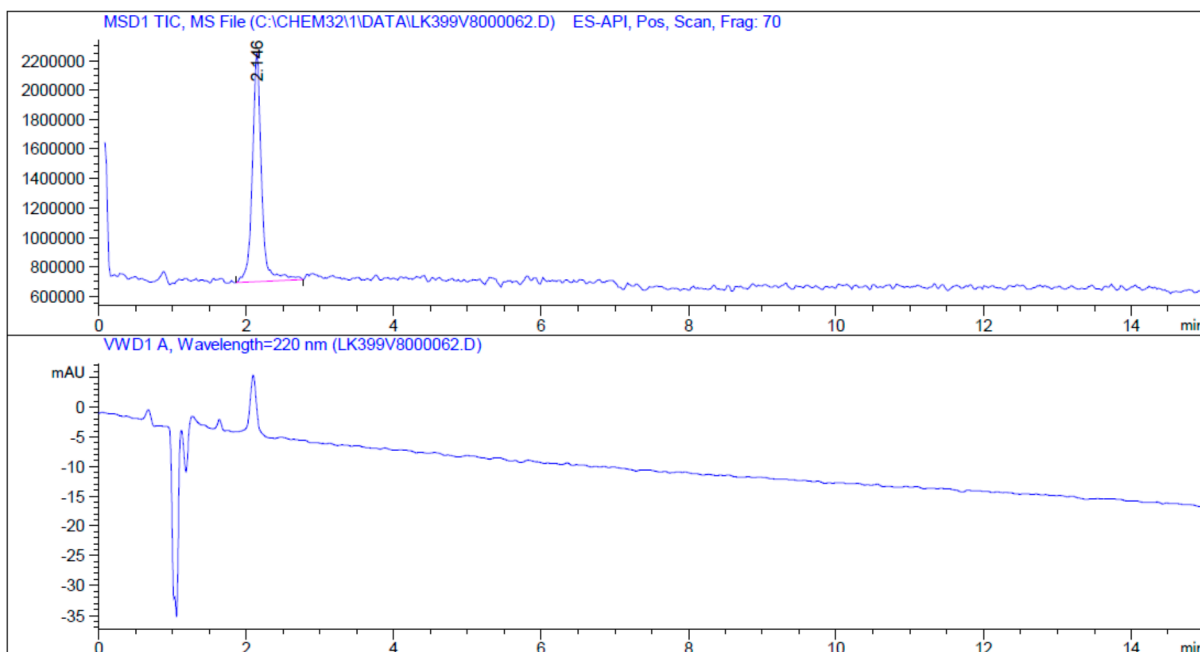

=====  
 Area Percent Report  
 =====

Sorted By : Signal  
 Multiplier: : 1.0000  
 Dilution: : 1.0000  
 Use Multiplier & Dilution Factor with ISTDs

Signal 1: MSD1 TIC, MS File

| Peak # | RetTime [min] | Type | Width [min] | Area      | Height    | Area %   |
|--------|---------------|------|-------------|-----------|-----------|----------|
| 1      | 2.146         | BB   | 0.1280      | 1.34620e7 | 1.55971e6 | 100.0000 |

Totals : 1.34620e7 1.55971e6

(S)-N-((S)-1-(1H-tetrazol-5-yl)ethyl)-2-((S)-2-aminopropanamido)propanamide **14c-LLL**:

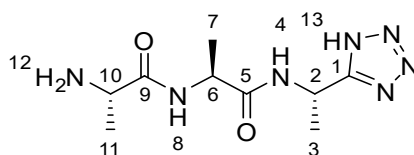

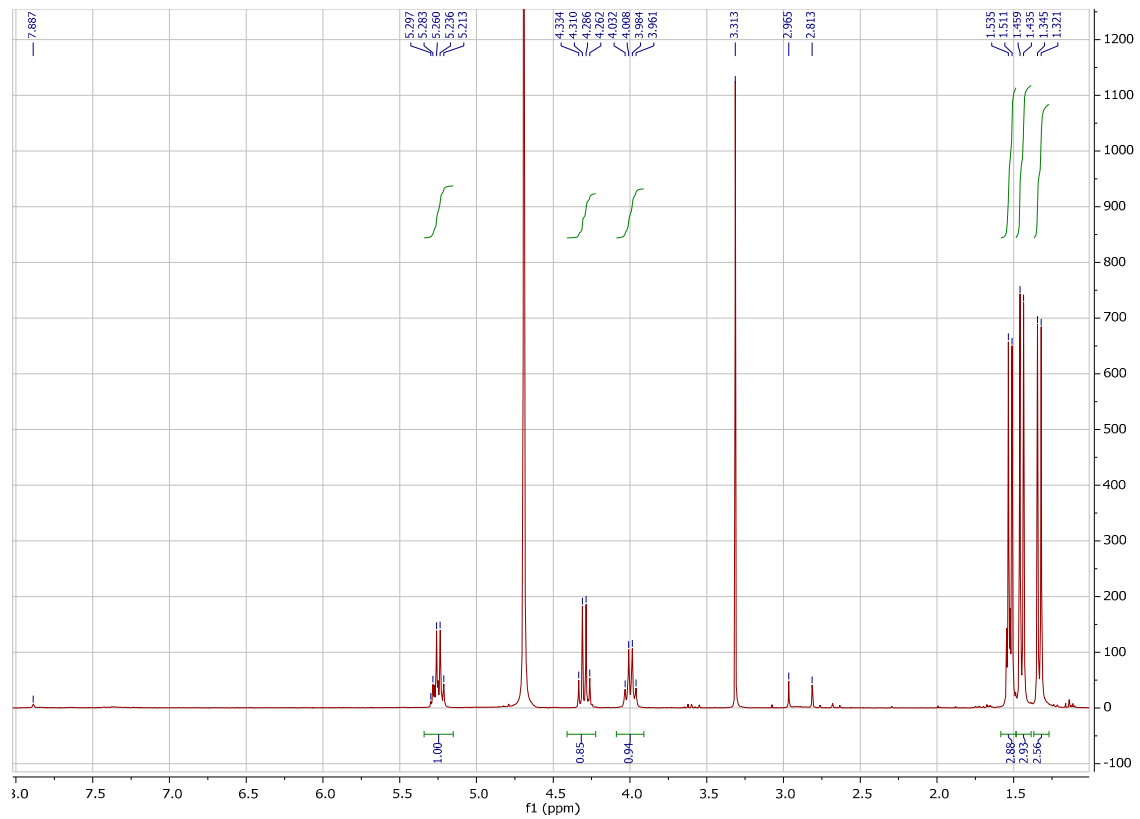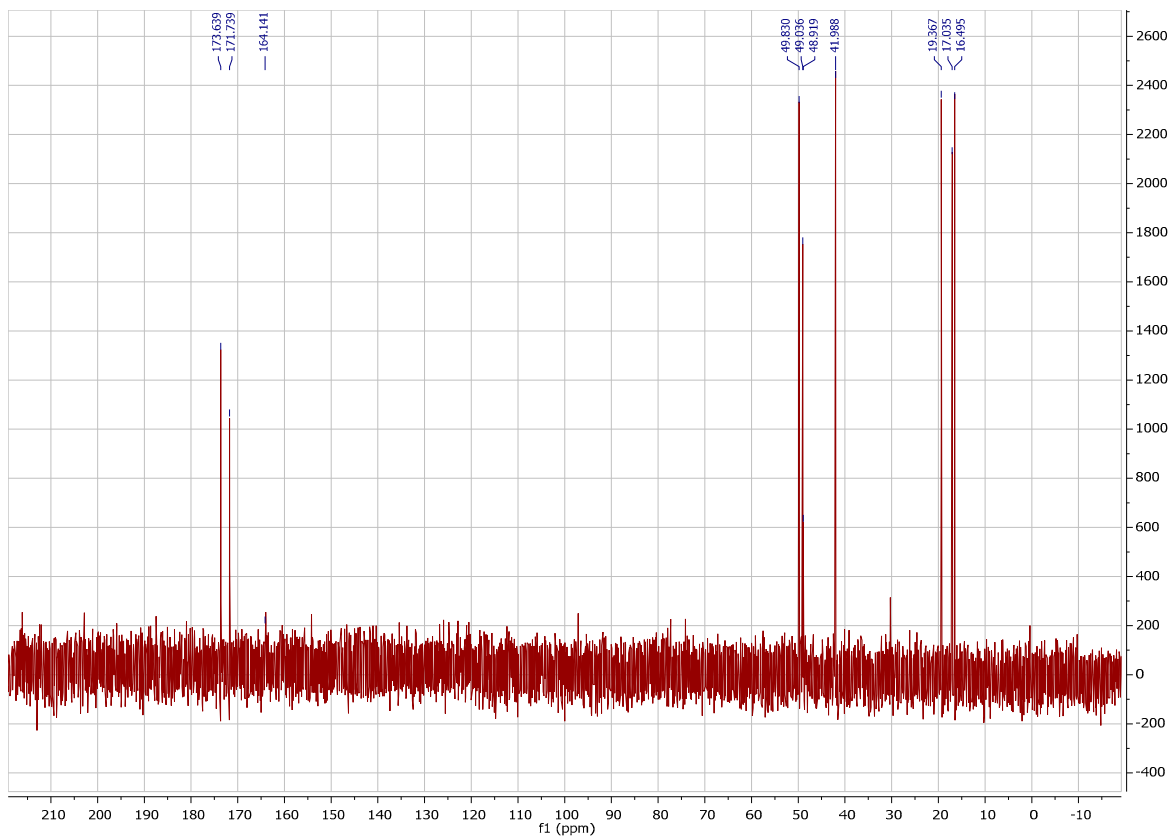

SM: 7G

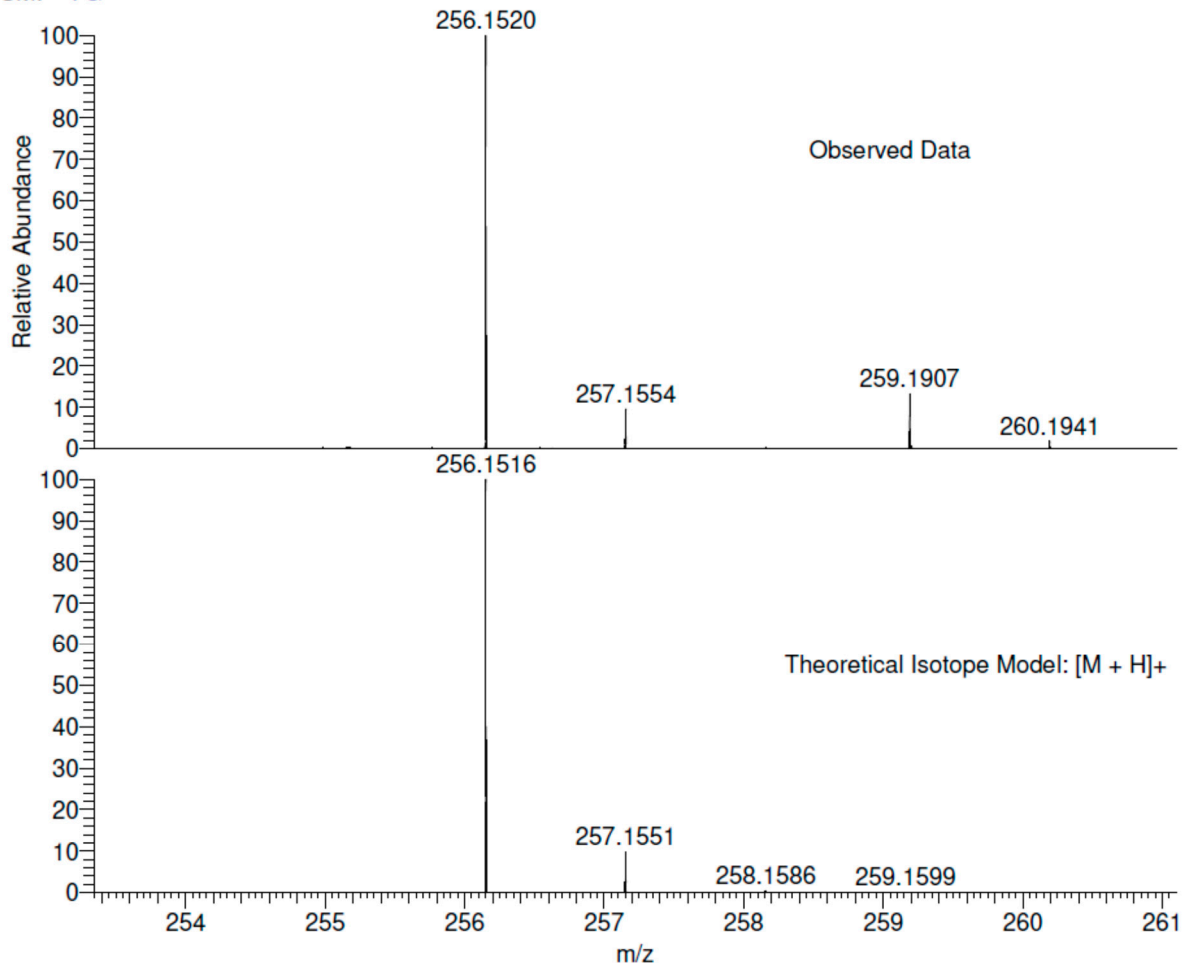

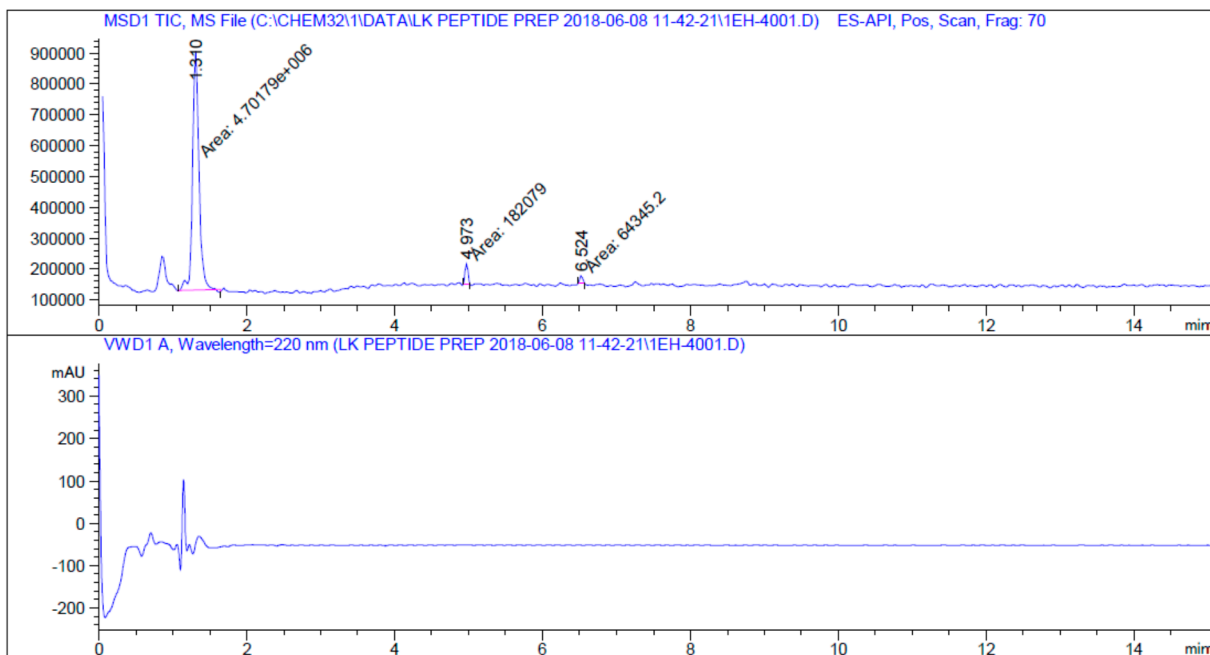

=====  
 Area Percent Report  
 =====

Sorted By : Signal  
 Multiplier: : 1.0000  
 Dilution: : 1.0000  
 Use Multiplier & Dilution Factor with ISTDs

Signal 1: MSD1 TIC, MS File

| Peak # | RetTime [min] | Type | Width [min] | Area      | Height    | Area %  |
|--------|---------------|------|-------------|-----------|-----------|---------|
| 1      | 1.310         | MM   | 0.1002      | 4.70179e6 | 7.82248e5 | 95.0199 |
| 2      | 4.973         | MM   | 0.0457      | 1.82079e5 | 6.63530e4 | 3.6797  |
| 3      | 6.524         | MM   | 0.0427      | 6.43452e4 | 2.51431e4 | 1.3004  |

Totals : 4.94821e6 8.73744e5

3-[[[(1S)-1-[[[(1S)-1-(1H-1,2,3,4-tetrazol-5-yl)ethyl]carbamoyl]ethyl]carbamoyl]propanoic acid  
**16-LL:**

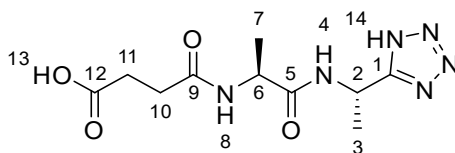



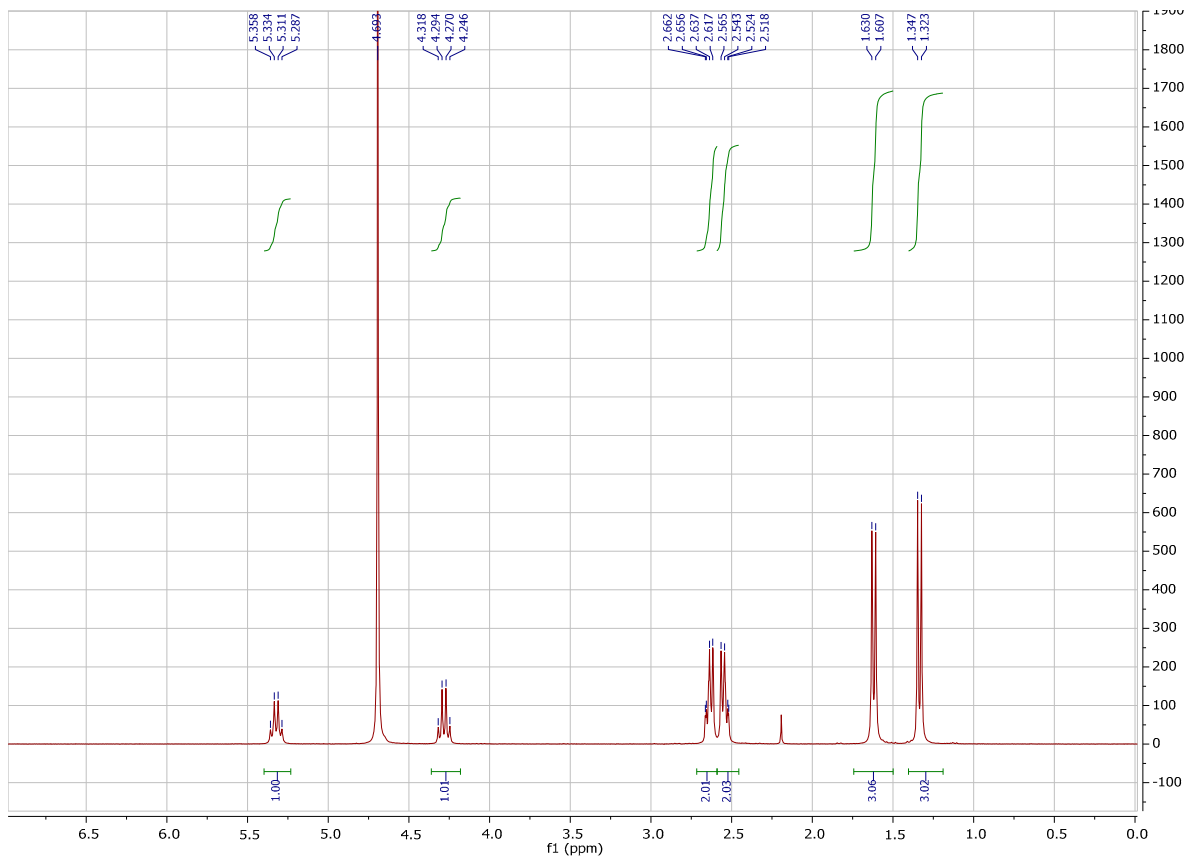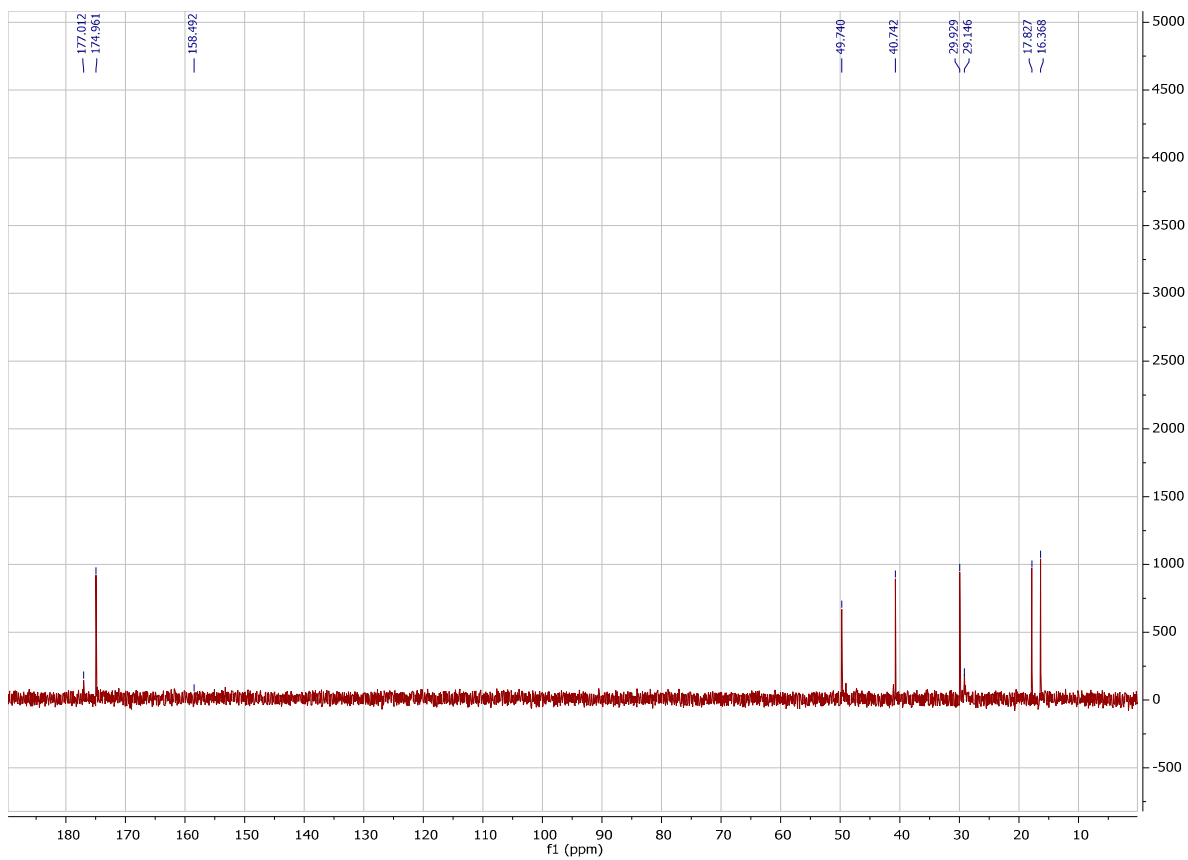

SM: 7G

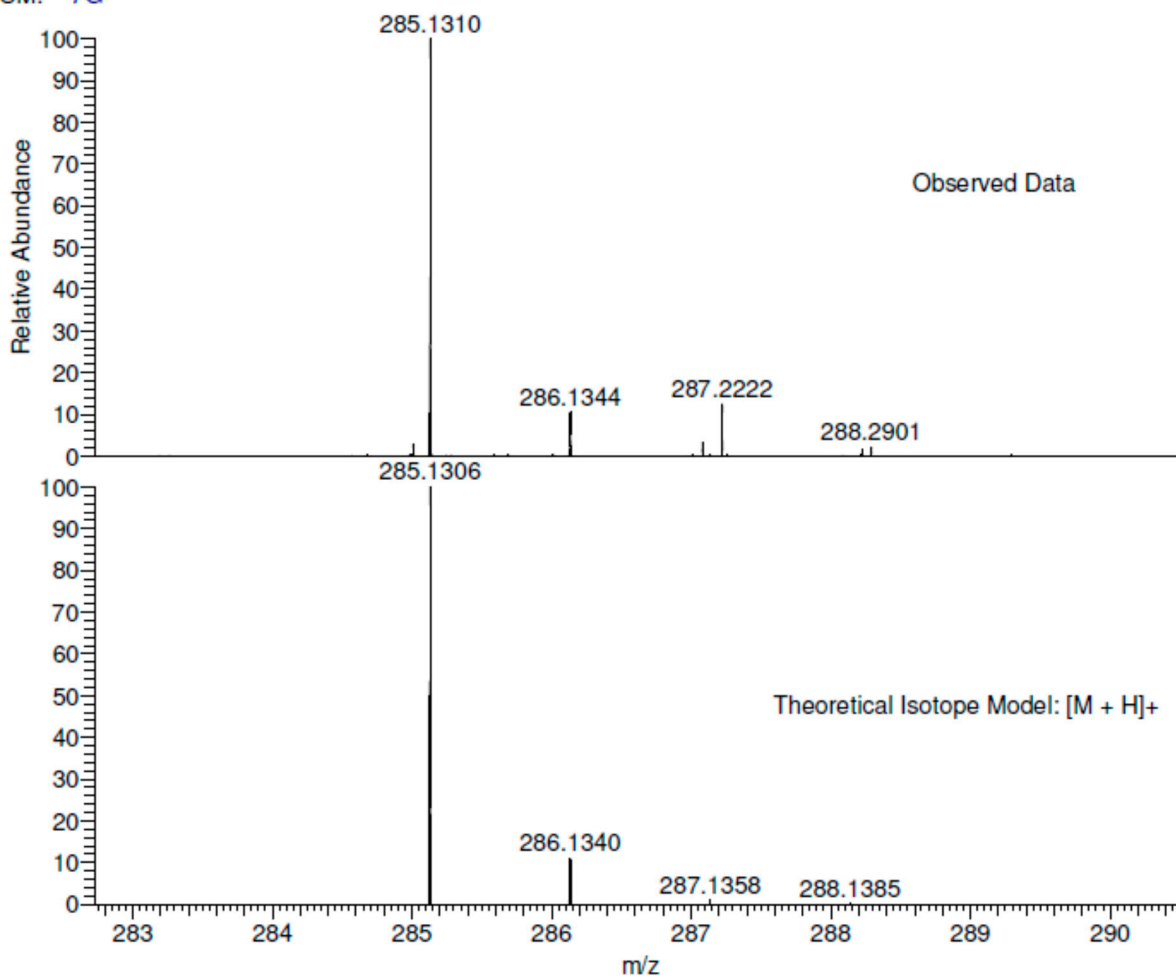

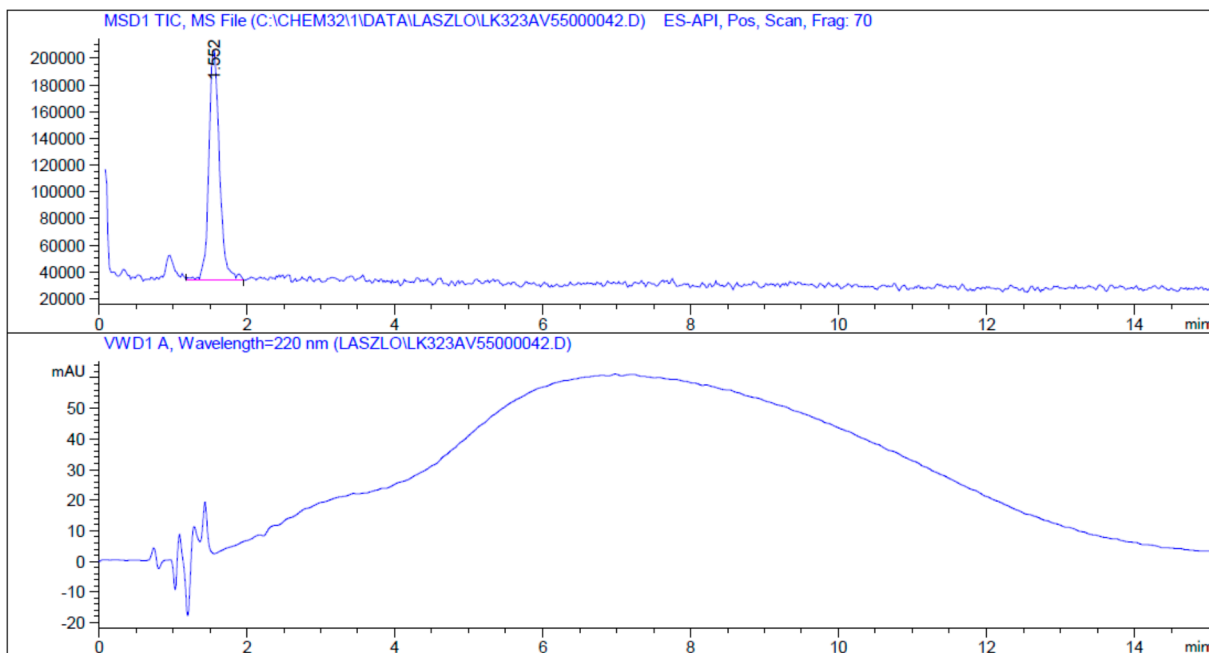

=====  
 Area Percent Report  
 =====

Sorted By : Signal  
 Multiplier: : 1.0000  
 Dilution: : 1.0000  
 Use Multiplier & Dilution Factor with ISTDs

Signal 1: MSD1 TIC, MS File

| Peak # | RetTime [min] | Type | Width [min] | Area      | Height    | Area %   |
|--------|---------------|------|-------------|-----------|-----------|----------|
| 1      | 1.552         | BB   | 0.1551      | 1.73583e6 | 1.73335e5 | 100.0000 |

Totals : 1.73583e6 1.73335e5

3-[[[(1S)-1-[[[(1S)-1-[[[(1S)-1-(1H-1,2,3,4-tetrazol-5-yl)ethyl]carbamoyl]ethyl]carbamoyl]ethyl]carbamoyl]propanoic acid **17-LLL**:

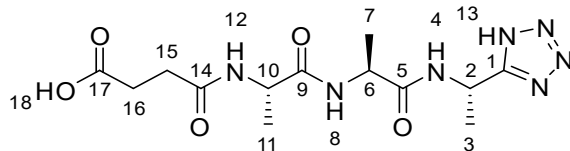

SSSSSSSSSSW

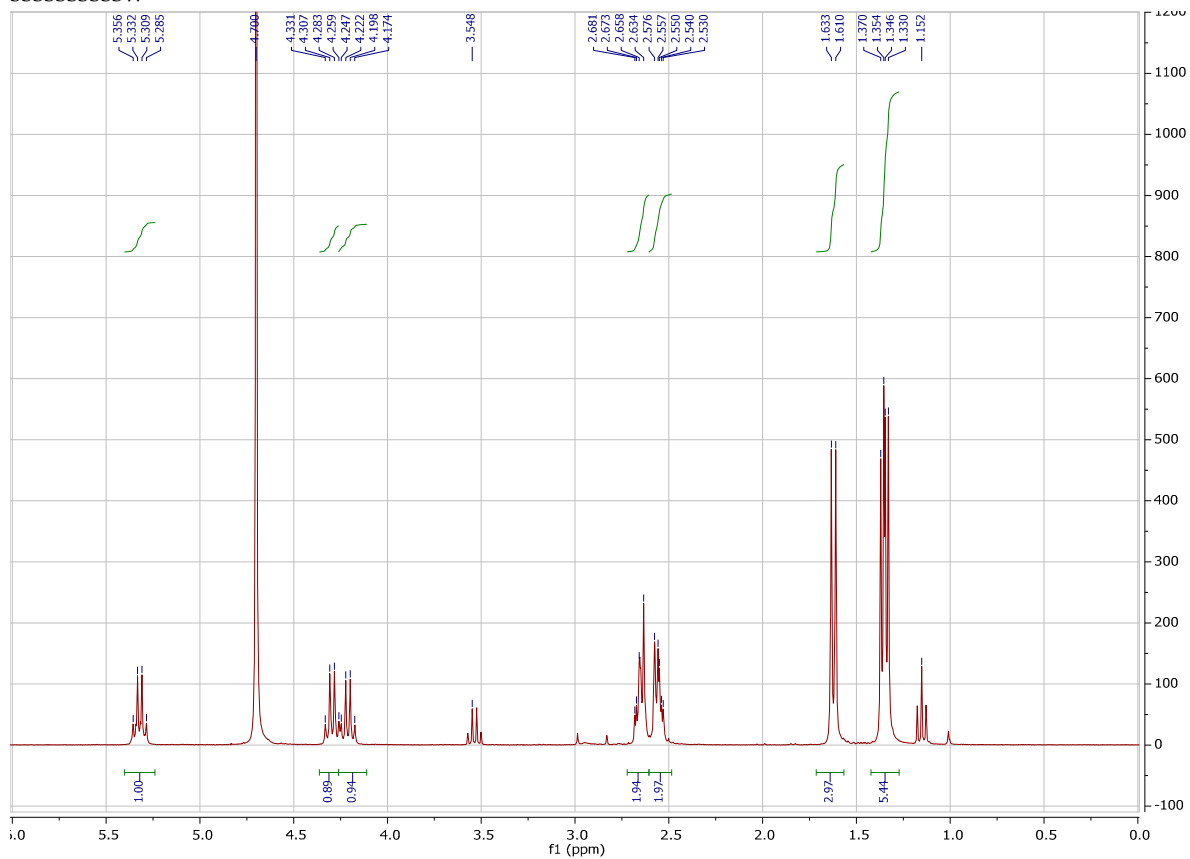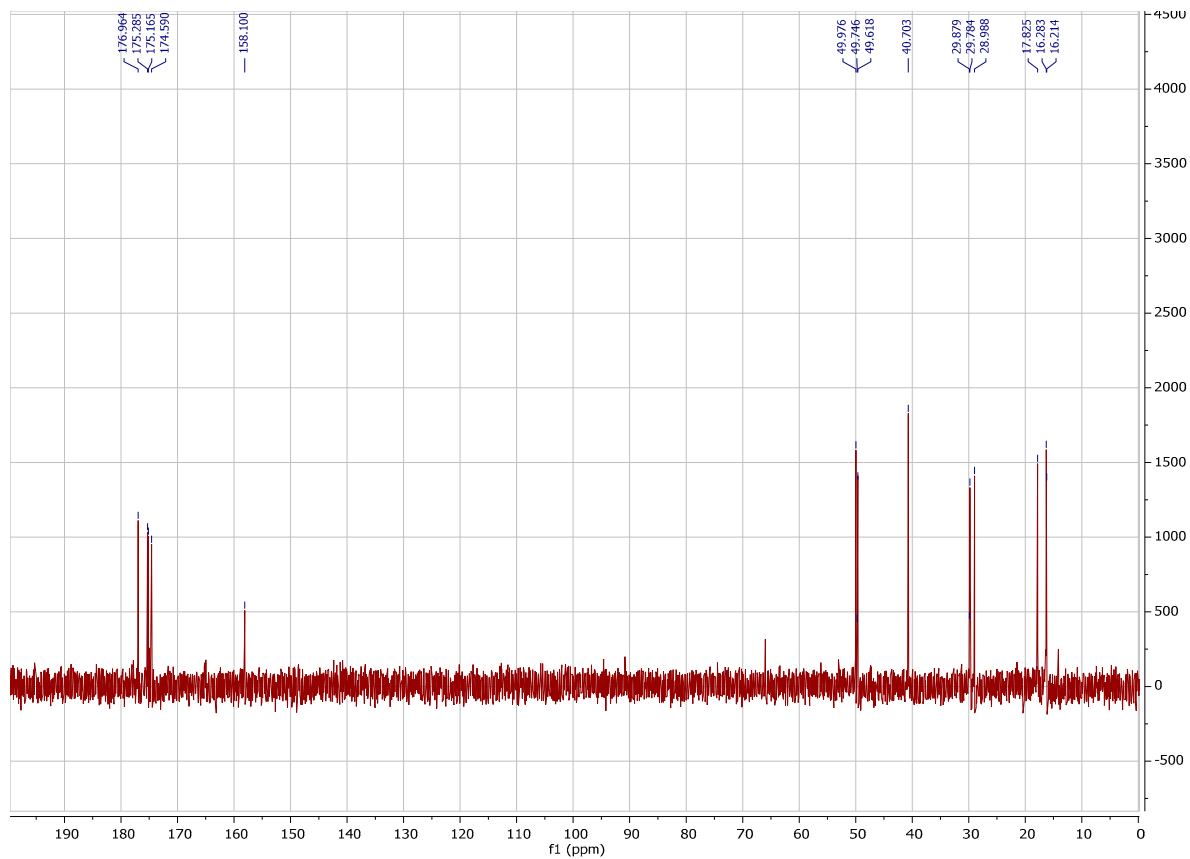

SM: 7G

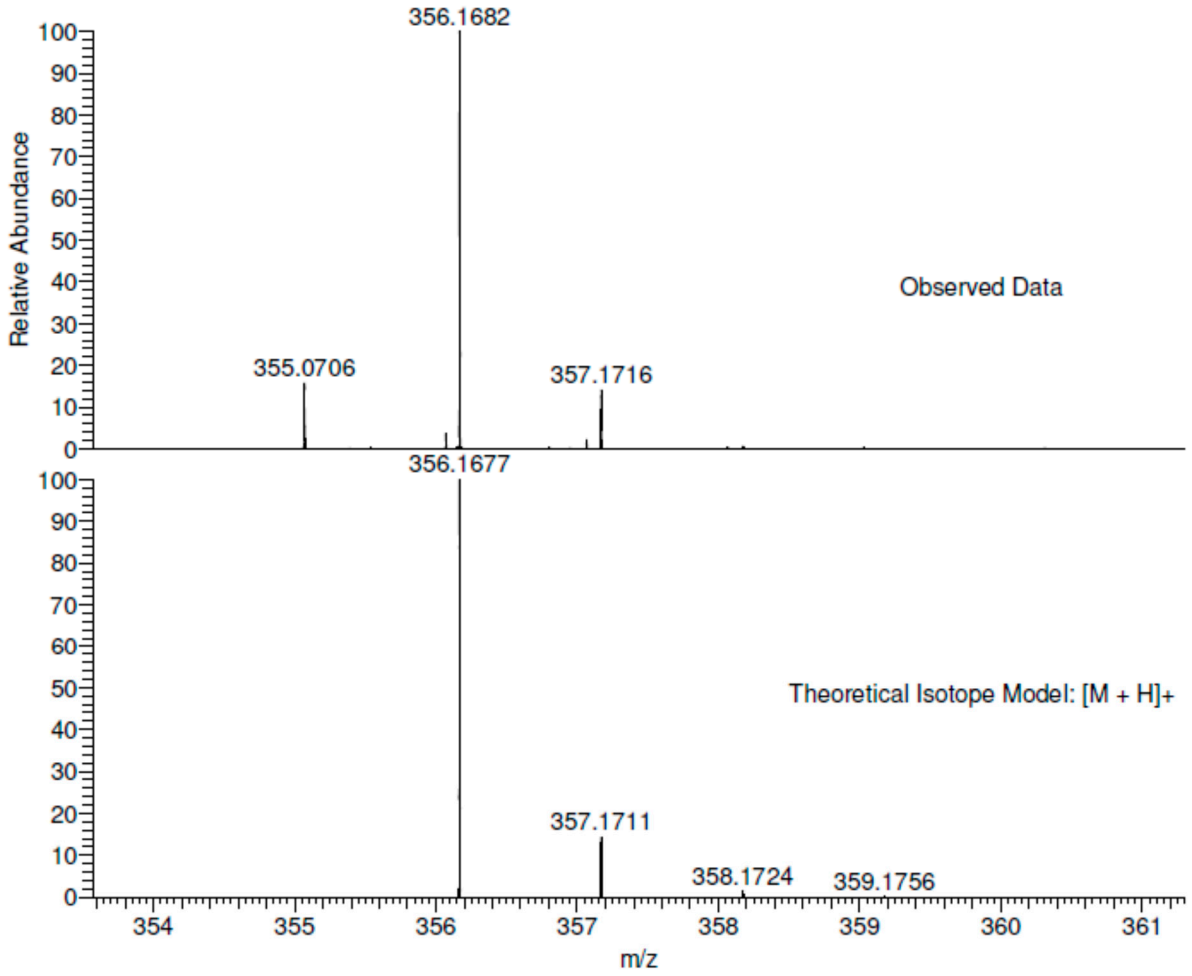

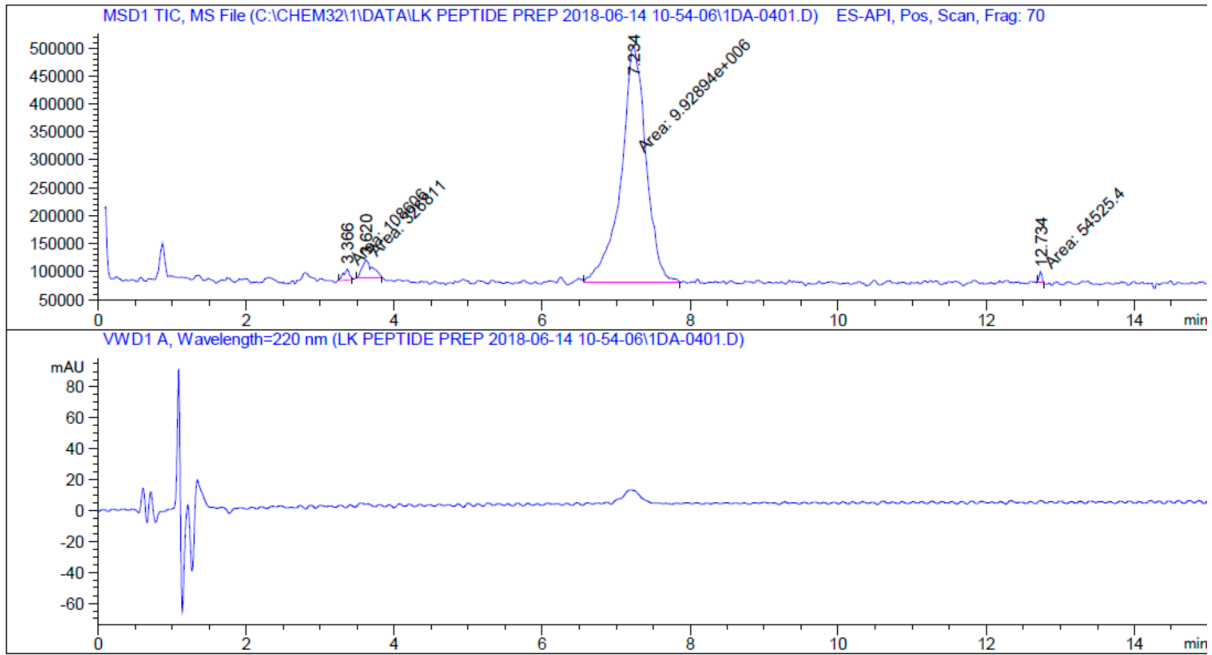

=====  
 Area Percent Report  
 =====

Sorted By : Signal  
 Multiplier: : 1.0000  
 Dilution: : 1.0000  
 Use Multiplier & Dilution Factor with ISTDs

Signal 1: MSD1 TIC, MS File

| Peak # | RetTime [min] | Type | Width [min] | Area      | Height    | Area %  |
|--------|---------------|------|-------------|-----------|-----------|---------|
| 1      | 3.366         | MM   | 0.0884      | 1.08606e5 | 2.04785e4 | 1.0424  |
| 2      | 3.620         | MM   | 0.1675      | 3.26811e5 | 3.25102e4 | 3.1367  |
| 3      | 7.234         | MM   | 0.3902      | 9.92894e6 | 4.24108e5 | 95.2976 |
| 4      | 12.734        | MM   | 0.0456      | 5.45254e4 | 1.99175e4 | 0.5233  |

Totals : 1.04189e7 4.97014e5

3-[[[(1S)-1-[[[(1S)-1-[[[(1S)-1-((1H-1,2,3,4-tetrazol-5-yl)ethyl]carbamoyl]ethyl]carbamoyl]ethyl]carbamoyl]propanoic acid **18-LLLL**:

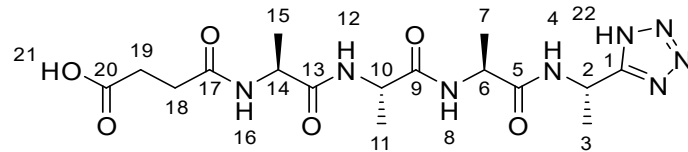

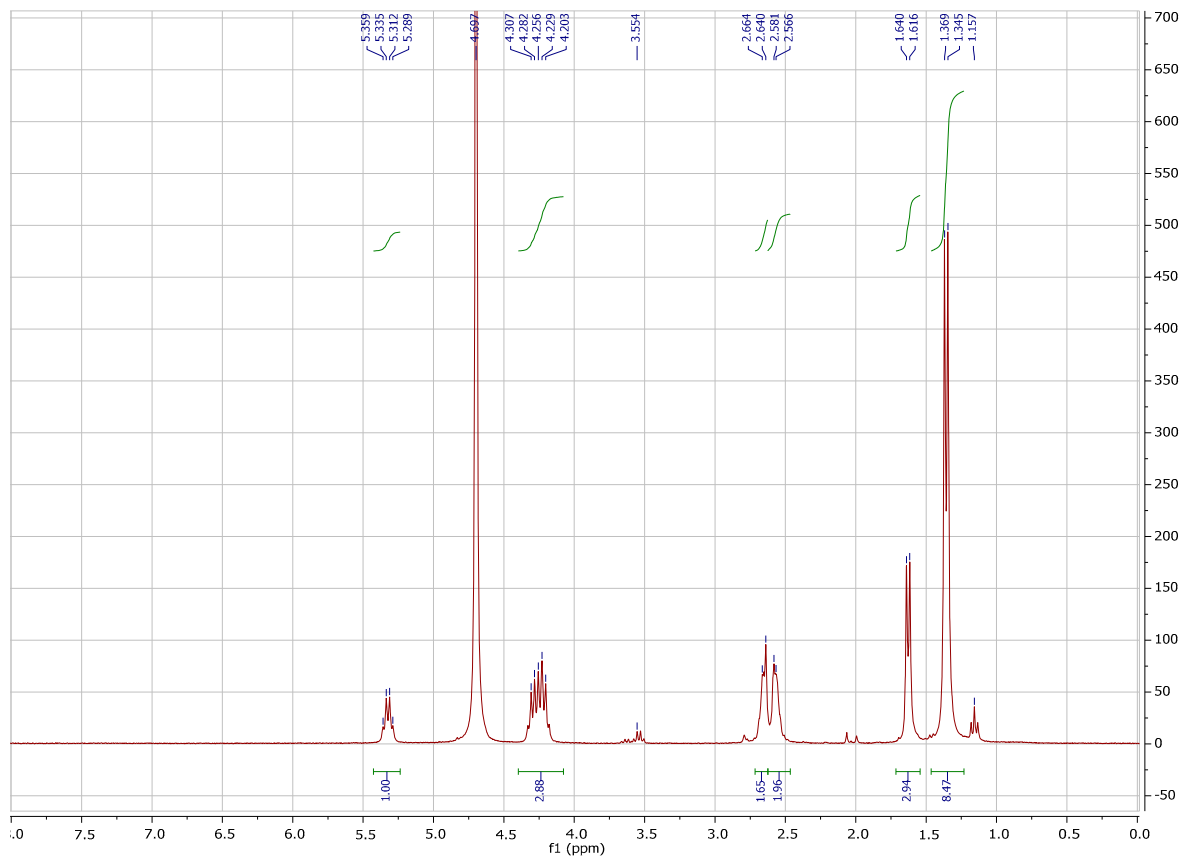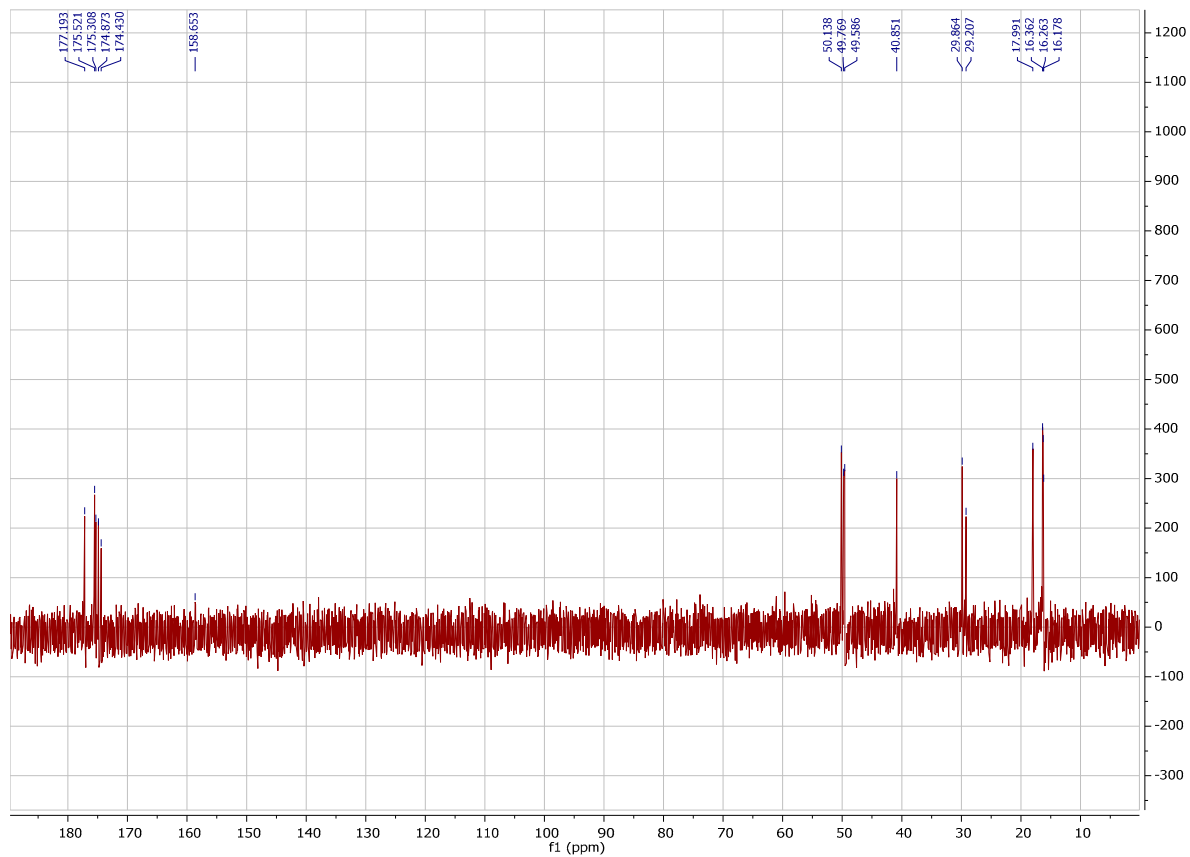

SM: 7G

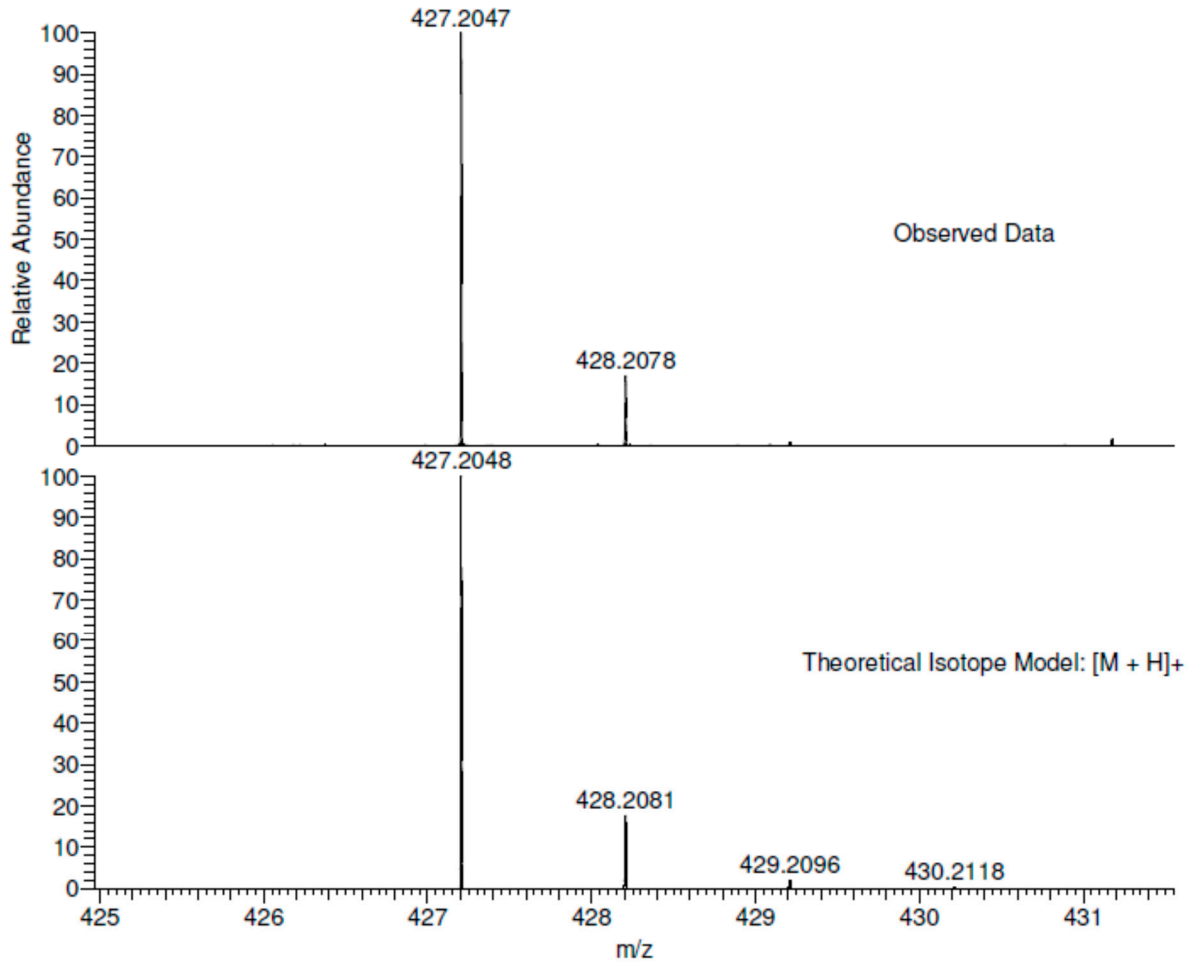



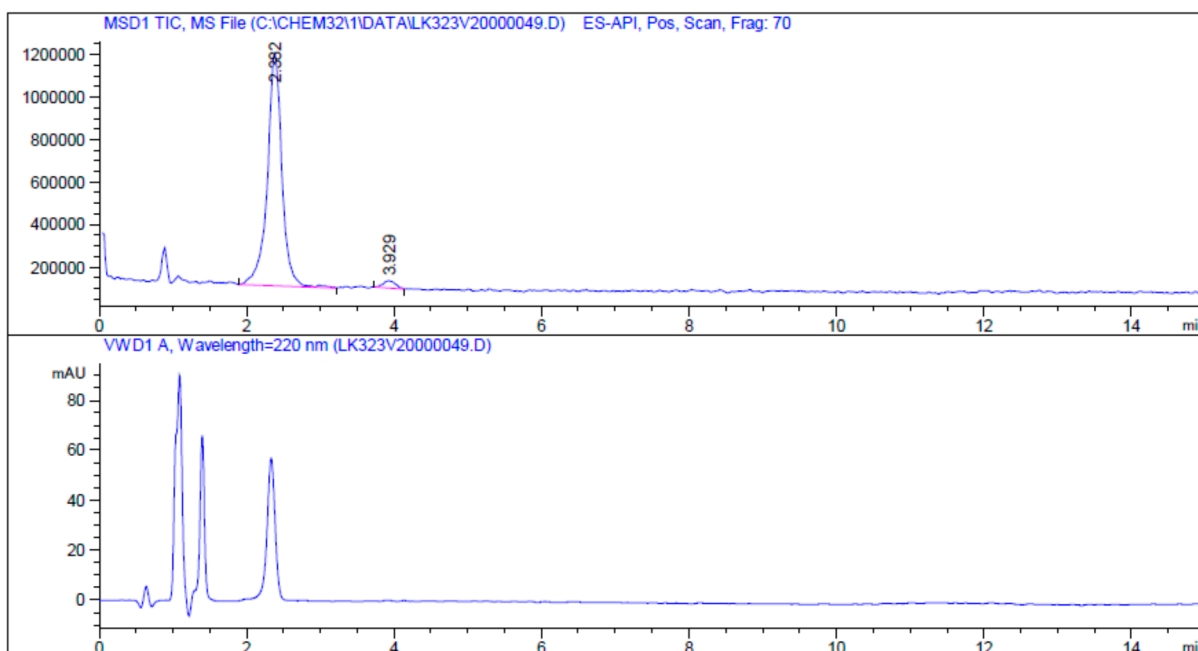

=====  
 Area Percent Report  
 =====

Sorted By : Signal  
 Multiplier: : 1.0000  
 Dilution: : 1.0000  
 Use Multiplier & Dilution Factor with ISTDs

Signal 1: MSD1 TIC, MS File

| Peak # | RetTime [min] | Type | Width [min] | Area      | Height    | Area %  |
|--------|---------------|------|-------------|-----------|-----------|---------|
| 1      | 2.382         | BB   | 0.2094      | 1.50151e7 | 1.09338e6 | 97.3823 |
| 2      | 3.929         | BB   | 0.1539      | 4.03623e5 | 3.56642e4 | 2.6177  |

Totals : 1.54188e7 1.12904e6

## Microbiology

All MICs were determined using an agar dilution method.<sup>16</sup> This necessitated the use of a defined antagonist-free medium (peptone-free), prepared as previously described with the inclusion of 2% saponin-lysed horse blood, 25 µg/ml NAD and 25 µg/ml haemin.<sup>46</sup> Test compounds were dissolved in sterile deionised water and incorporated into the antagonist-free medium at a final concentration range of 1 – 128 mg/l. All bacteria were prepared from fresh (18 h) subcultures on blood agar. Each isolate was suspended in sterile deionised water to a density equivalent to 0.5 McFarland units using a densitometer (approx.  $1.5 \times 10^8$  CFU/ml) and then diluted 1 in 15. A 1 µl aliquot of each diluted suspension was then delivered onto plates with a multipoint inoculator to give a final inoculum of approximately 10 000 or 150 000 CFU/spot as recommended.<sup>16</sup> All plates (including antimicrobial-free

controls) were incubated for 22 h at 37°C. The minimum inhibitory concentration (MIC) was recorded as the lowest concentration of test compound that resulted in complete inhibition of bacterial growth.

## HPLC blanks

### HPLC method A

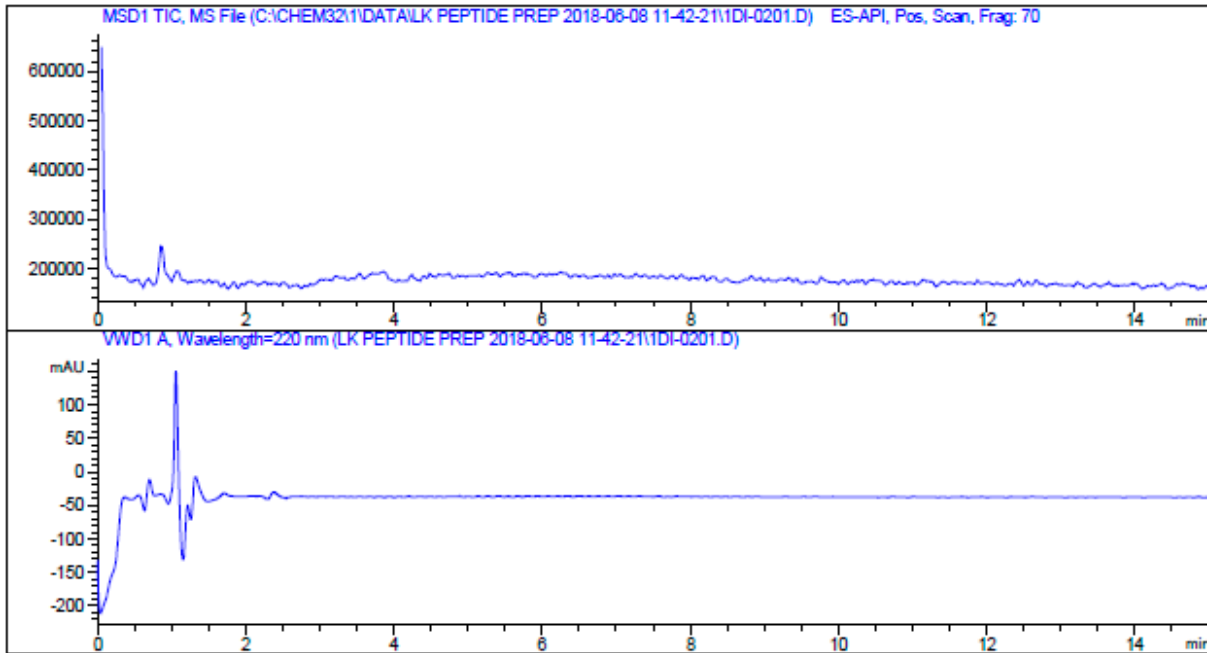

### HPLC method B

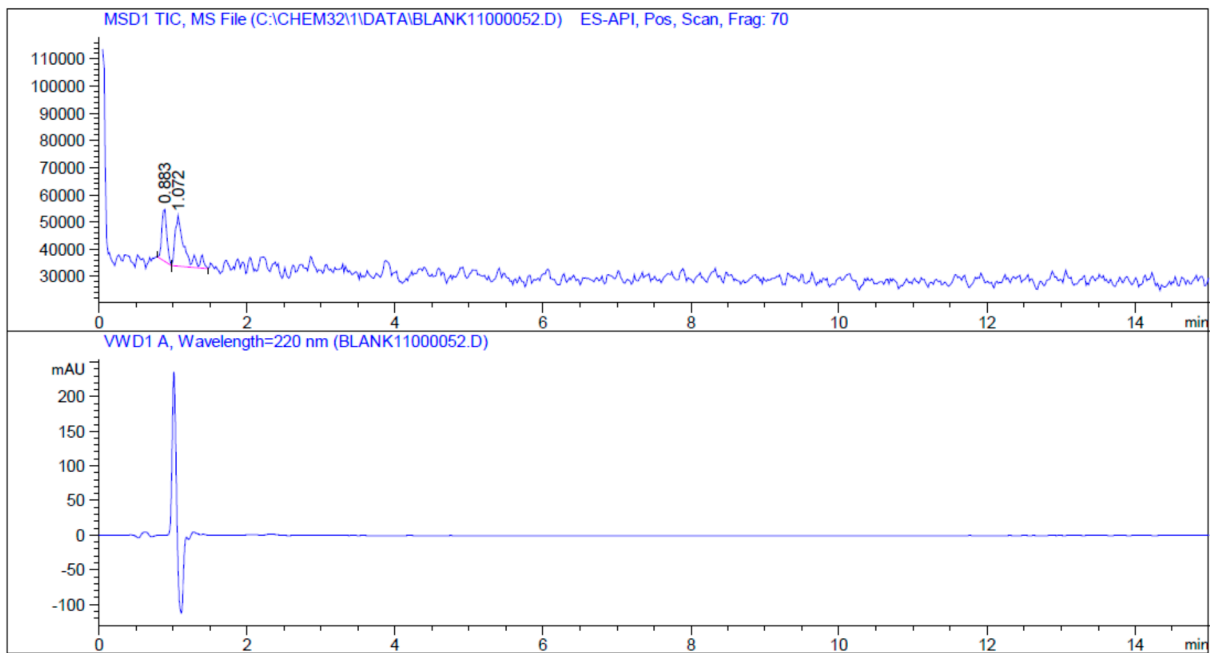

### HPLC method C

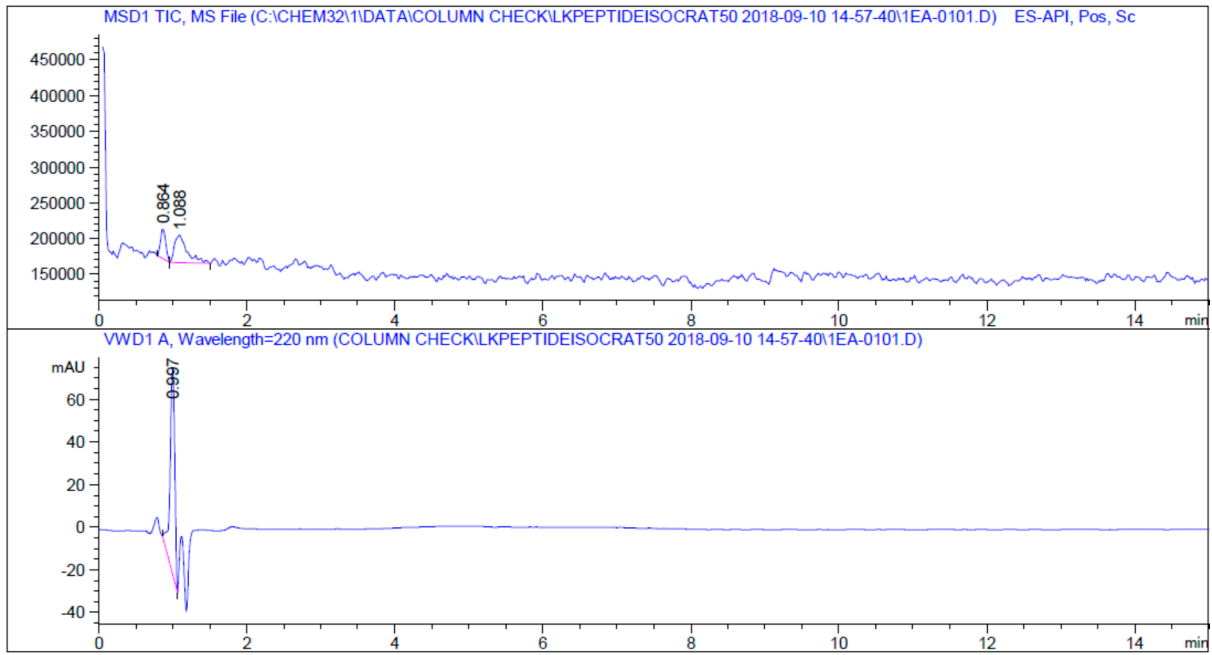

### HPLC method D

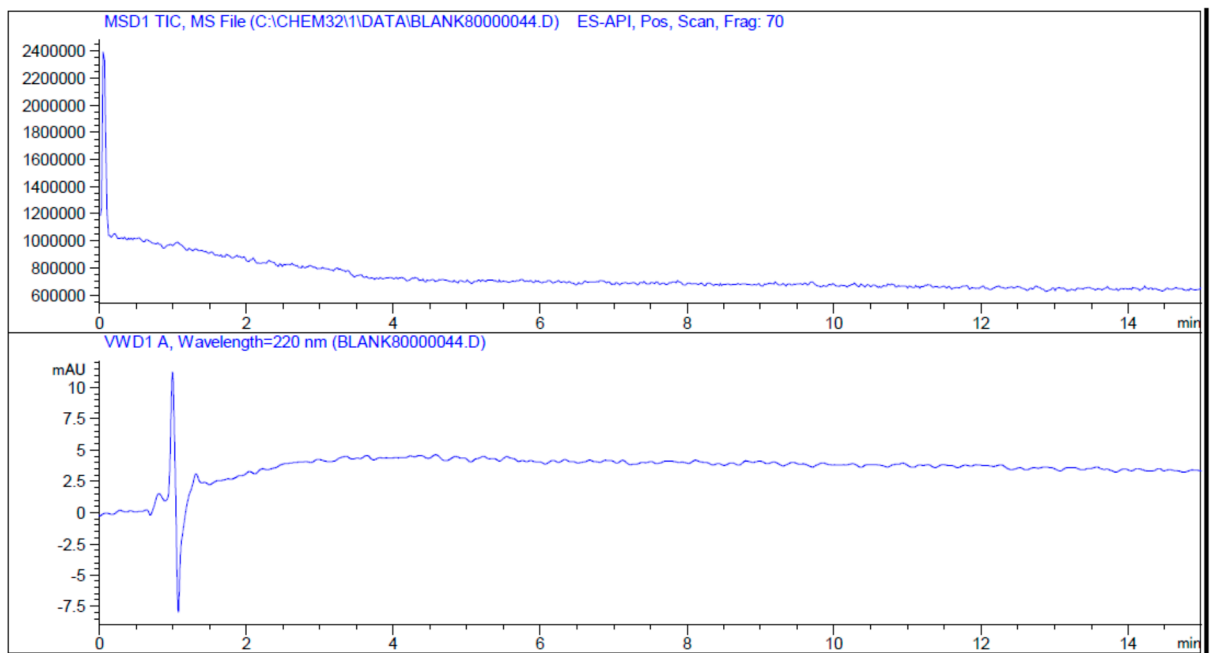

Supplement: molecules-25-01315-s001.pdf [file molecules-25-01315-s001.pdf]
